# Supplementary material for: What is the major driver of China’s hospital medical expenditure growth? A decomposing analysis
Source: PubMed Central journal article supplement — BMJ Open. 2022 Feb 8;12(2):e048308. doi: 10.1136/bmjopen-2020-048308 (PMC8830235; doi:10.1136/bmjopen-2020-048308), 2022-02-08
Supplement: bmjopen-2020-048308.draft_revisions.pdf [file bmjopen-2020-048308.draft_revisions.pdf]

# BMJ Open

BMJ Open is committed to open peer review. As part of this commitment we make the peer review history of every article we publish publicly available.

When an article is published we post the peer reviewers' comments and the authors' responses online. We also post the versions of the paper that were used during peer review. These are the versions that the peer review comments apply to.

The versions of the paper that follow are the versions that were submitted during the peer review process. They are not the versions of record or the final published versions. They should not be cited or distributed as the published version of this manuscript.

BMJ Open is an open access journal and the full, final, typeset and author-corrected version of record of the manuscript is available on our site with no access controls, subscription charges or pay-per-view fees (<http://bmjopen.bmj.com>).

If you have any questions on BMJ Open's open peer review process please email [info.bmjopen@bmj.com](mailto:info.bmjopen@bmj.com)

# BMJ Open

## What is the major driver of China's hospital medical expenditure growth? A decomposition analysis

|                               |                                                                                                                                                                                                                                                                                                                                                                                                                                                                                                                             |
|-------------------------------|-----------------------------------------------------------------------------------------------------------------------------------------------------------------------------------------------------------------------------------------------------------------------------------------------------------------------------------------------------------------------------------------------------------------------------------------------------------------------------------------------------------------------------|
| Journal:                      | <i>BMJ Open</i>                                                                                                                                                                                                                                                                                                                                                                                                                                                                                                             |
| Manuscript ID                 | bmjopen-2020-048308                                                                                                                                                                                                                                                                                                                                                                                                                                                                                                         |
| Article Type:                 | Original research                                                                                                                                                                                                                                                                                                                                                                                                                                                                                                           |
| Date Submitted by the Author: | 22-Dec-2020                                                                                                                                                                                                                                                                                                                                                                                                                                                                                                                 |
| Complete List of Authors:     | Yan, Xiaoling; Chinese Academy of Medical Sciences and Peking Union Medical College, School of Health Policy and Management; Chinese Academy of Medical Sciences & Peking Union Medical College Institute of Medical Information<br>Liu, Yuanli; Chinese Academy of Medical Sciences and Peking Union Medical College, School of Health Policy and Management<br>Rao, Keqin; China Health Economics Association<br>Li, Jinlei; Chinese Academy of Medical Sciences and Peking Union Medical College School of Public Health |
| Keywords:                     | HEALTH ECONOMICS, Health policy < HEALTH SERVICES ADMINISTRATION & MANAGEMENT, Health economics < HEALTH SERVICES ADMINISTRATION & MANAGEMENT                                                                                                                                                                                                                                                                                                                                                                               |
|                               |                                                                                                                                                                                                                                                                                                                                                                                                                                                                                                                             |

SCHOLARONE™  
Manuscripts

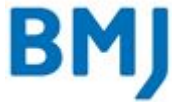

I, the Submitting Author has the right to grant and does grant on behalf of all authors of the Work (as defined in the below author licence), an exclusive licence and/or a non-exclusive licence for contributions from authors who are: i) UK Crown employees; ii) where BMJ has agreed a CC-BY licence shall apply, and/or iii) in accordance with the terms applicable for US Federal Government officers or employees acting as part of their official duties; on a worldwide, perpetual, irrevocable, royalty-free basis to BMJ Publishing Group Ltd ("BMJ") its licensees and where the relevant Journal is co-owned by BMJ to the co-owners of the Journal, to publish the Work in this journal and any other BMJ products and to exploit all rights, as set out in our [licence](#).

The Submitting Author accepts and understands that any supply made under these terms is made by BMJ to the Submitting Author unless you are acting as an employee on behalf of your employer or a postgraduate student of an affiliated institution which is paying any applicable article publishing charge ("APC") for Open Access articles. Where the Submitting Author wishes to make the Work available on an Open Access basis (and intends to pay the relevant APC), the terms of reuse of such Open Access shall be governed by a Creative Commons licence – details of these licences and which [Creative Commons](#) licence will apply to this Work are set out in our licence referred to above.

Other than as permitted in any relevant BMJ Author's Self Archiving Policies, I confirm this Work has not been accepted for publication elsewhere, is not being considered for publication elsewhere and does not duplicate material already published. I confirm all authors consent to publication of this Work and authorise the granting of this licence.

# What is the major driver of China's hospital medical expenditure growth?

## A decomposing analysis

Xiaoling Yan<sup>1,2</sup>, Yuanli Liu<sup>1\*</sup>, Keqin Rao<sup>3</sup> and Jinlei Li<sup>4</sup>

<sup>1</sup> School of Health Policy and Management, Chinese Academy of Medical Sciences and Peking Union Medical College, 5 Dongdansantiao, Dongcheng District, Beijing 100730, China; yanxiaoling08@163.com(X.Y.)

<sup>2</sup> Institute of Medical Information, Chinese Academy of Medical Sciences and Peking Union Medical College, 3 yabao Street, Chaoyang District, Beijing 100020, China

<sup>3</sup> China Health Economics Association, 38 Xueyuan Street, Haidian District, Beijing 100191, China; uab12345@qq.com

<sup>4</sup> School of Public Health, Chinese Academy of Medical Sciences and Peking Union Medical College, 5 Dongdansantiao, Dongcheng District, Beijing 100730, China; lijinglei921@126.com(J.L.)

\* Correspondence: liuyl\_fpo@126.com; Tel.: +86-1352-2592-907

Word count:2,500

**ABSTRACT**

**Objectives:** To quantify increases in the medical expenditures of public hospitals associated with changes in service use and prices, which could inform policy efforts to curb the future growth of hospital medical expenditures.

**Design:** Nationwide and provincial data on service volume, service price and intensity of public hospitals' outpatient and inpatient services from 2008 to 2018 were extracted from the China Health Statistical Yearbooks, and population size data were obtained from the 2019 China Statistical Yearbook.

**Methods:** Decomposition analysis was performed to measure the relative effects of changes in service use (volume or utilization rate) and service price and intensity on the increase in the inpatient and outpatient total and average (per capita) medical expenditures of public hospitals from 2008 through 2018.

**Results:** After adjustments for price inflation, the total and average medical expenditure of public hospitals increased approximately 3-fold from 2008 to 2018. Over this period, the increase in service volume was associated with 67.4% of the observed increase in total medical expenditures in the inpatient sector and with 57.2% of the observed increase in total medical expenditures in the outpatient sector; the growth in utilization rate was associated with 66.3% of the observed

1  
2  
3  
4 growth in average medical expenditures in the inpatient sector and with  
5  
6 55.2% of the observed growth in average medical expenditures in the  
7  
8 outpatient sector.  
9

10  
11 **Conclusion:** Service use, rather than price, appears to be the major driver  
12  
13 of increases in medical expenditures in Chinese hospital. These results  
14  
15 will inform medical cost containment policies in both China and other  
16  
17 countries.  
18  
19  
20  
21

### 22 23 **Strengths and limitations of this study**

- 24  
25 ● This is the first paper using the decomposing method to explore the  
26  
27 associations of service use, service price and intensity with  
28  
29 increases in public hospitals' total and average medical expenditures  
30  
31 in the first decade of the new round of health system reform in China.  
32  
33
- 34  
35 ● This study traced sources of the growth in medical costs for outpatient  
36  
37 and inpatient care in public hospitals.  
38  
39
- 40  
41 ● Nationwide and provincial data were used, which could provide crucial  
42  
43 evidence for local decision makers.  
44  
45
- 46  
47 ● Due to the lack of a price index specific to the health sector in  
48  
49 China, this study cannot distinguish between the contributions of  
50  
51 service price and service intensity.  
52  
53
- 54  
55 ● This study did not consider changes in types of conditions prompting  
56  
57 people to visit the hospitals and the aging of the population.  
58  
59  
60

## INTRODUCTION

Medical cost escalation is a major problem in both developed and developing countries, including China.<sup>[1],[2]</sup> What is the major driver of medical cost growth? Some existing literature directly explores US health spending drivers by decomposing growth in health spending into its constituent parts, which focus on 2 or more factors, including population growth, population ageing, disease prevalence, utilization, cost of care, and technology. No consensus has been reached on the factors driving increased US healthcare spending.<sup>[3],[4],[5]</sup>

Studies decomposing growth in China's health expenditure since the 1990s have also obtained different results. Zhai et al.'s study, using data from China's National Health Accounts studies and Global Burden of Disease 2013 studies, decomposed the changes in health expenditures by disease into population growth, population ageing, disease prevalence rate, expenditure per case of disease, and excess health price inflation. It found that 72.6% of the increases in China's health expenditure between 1993 and 2012 was caused by the growth in health expenditure per prevalent case.<sup>[6]</sup> A recent study by Yip et al., using the China National Health Accounts data, decomposed the growth in health spending by healthcare type into increase in visit volume and increase in charges per visit or admission. The study showed that the increase in visit volume accounted for approximately 70% of the increase in total health spending in China

1  
2  
3  
4 between 2008 and 2017, and increases in charges per visit or admission  
5  
6 accounted for approximately 30% of the increase.<sup>[7]</sup> These studies examined  
7  
8  
9 drivers of health expenditure growth from different perspectives (cost  
10  
11 of disease and healthcare) in different periods of time since the 1990s.  
12  
13

14 As the main body of China's health service delivery system, public  
15  
16 hospitals accounted for 93.2% of hospital inpatient admissions and 92.6%  
17  
18 of hospital ambulatory visits in 2008; the corresponding values dropped  
19  
20 to 81.8% and 85.3% in 2018.<sup>[8]</sup> Public hospital medical expenditures  
21  
22 accounted for approximately half of the total health expenditures in  
23  
24 2018.<sup>[8, 9]</sup> Cost containment in public hospitals is a key focus of China's  
25  
26 new round of health system reform since 2009. <sup>[7],[10]</sup> Public hospital  
27  
28 reforms were launched in 2012, including altering provider payment,  
29  
30 eliminating drug mark-up, and adjusting fee schedules. Previous studies  
31  
32 took an indirect approach, using regression methods to examine the  
33  
34 respective impacts of these reforms on drug expenditures and total or  
35  
36 per visit medical expenditures.<sup>[11-17]</sup> These studies found that such  
37  
38 reforms reduced drug expenditures, but not overall medical  
39  
40 expenditures.<sup>[17]</sup>  
41  
42  
43  
44  
45  
46  
47  
48  
49

50 Our study focuses on growth in total and average medical expenditure  
51  
52 of public hospitals. We take a direct approach to decompose growth into  
53  
54 its constituent factors, including changes in service use and changes  
55  
56 in service price and intensity. To our knowledge, this is the first paper  
57  
58  
59  
60



1  
2  
3  
4 to use the decomposing method to explore the associations of service use,  
5  
6 service price and intensity with increases in total and average medical  
7  
8 expenditures for public hospitals based on nationwide and provincial  
9  
10 data during the first decade of the new round of health system reform  
11  
12 in China. These results will inform cost containment policies in China  
13  
14 and other countries that experience soaring health expenditures.  
15  
16  
17  
18  
19  
20  
21

## 22 **STUDY DATA AND METHODS**

### 23 **Data source and variable definitions**

24  
25 We extracted eleven years of nationwide data and eight years of provincial  
26  
27 data from the China Health Statistical Yearbooks in 2009–2019 published  
28  
29 by the National Health Commission. We obtained aggregative information  
30  
31 on medical expenditures per visit or per admission discharged, and  
32  
33 service volumes of public hospital outpatient and inpatient care for  
34  
35 each year.<sup>[8]</sup> In this paper, we use public hospital medical revenue  
36  
37 variables as expenditure indicators. According to the interpretation  
38  
39 of the indicators in the China Health Statistics Yearbook and previous  
40  
41 studies<sup>[17]</sup>, hospital medical expenditures in this study fall into three  
42  
43 categories: medical services, drugs, and diagnostic  
44  
45 examinations/medical consumables. All expenditure variables in this  
46  
47 study were adjusted for inflation using the economy-wide consumer price  
48  
49 index of China from the International Monetary Fund and were reported  
50  
51  
52  
53  
54  
55  
56  
57  
58  
59  
60

in Chinese yuan in 2018 prices.<sup>[18]</sup> Nationwide and provincial population size data were obtained from the 2019 China Statistical Yearbook.

Table 1 provides definitions of variables used in this study. For outpatient care, service volume was the annual volume of visits to public hospitals, and utilization was the portion of population that received public hospital outpatient care, while price and intensity were the mean expenditure per visit. For inpatient care, service volume was the annual volume of admissions discharged from public hospitals, and utilization was the portion of population that received public hospital inpatient care, while price and intensity were the mean expenditure per admission discharged.

**Table 1 Definitions for service volume, utilization, price and intensity, by type of care**

| Care type  | Service volume<br>(A)                                                               | Service utilization<br>(B)                                                                                                  | Price and intensity<br>(C)                   |
|------------|-------------------------------------------------------------------------------------|-----------------------------------------------------------------------------------------------------------------------------|----------------------------------------------|
| Outpatient | Annual volume of visits to public hospitals in outpatient and emergency departments | Annual visits per capita; that is the portion of the population that received public hospital outpatient and emergency care | Medical expenditure per visit                |
| Inpatient  | Annual volume of admissions discharged from public hospitals                        | Annual admissions per capita, that is, the portion of the population that received public hospital inpatient care           | Medical expenditure per admission discharged |

## Decomposition methods

The total medical expenditure of public hospitals is the product of two factors: (1) service volume and (2) price and intensity, as shown in the following equation:

$$TME_y = V_y \times P_y,$$

where  $y$  indicates year;  $TME_y$  is total medical expenditure;  $V_y$  is service volume; and  $P_y$  is price and intensity.

To measure the relative effect of each factor, we used the decomposition method described by Das Gupta<sup>[19]</sup>. This decomposition was based on the equation above to calculate standardized rates for each factor and then calculate their additive contributions to annual changes in hospital outpatient or inpatient total medical expenditures from 2008 to 2018. (For a more detailed description of the decomposing method, see online appendix exhibit 1).

Given that service volume is the number of people that receive inpatient or outpatient care in public hospitals, its effect on growth in real total medical expenditures reflects both the effects of population growth and the changing portion of people using care. After adjusting for population growth, we used the decomposition method to measure the relative effect of service utilization (portion of population using care) and price and cost per case on the growth in average real medical expenditure (per capita).

## RESULTS

Both the inpatient and outpatient real total medical expenditures of public hospitals increased annually from 2008 to 2018 (Table 2). In 2018, the inpatient real total medical expenditure increased 3.6 fold, and the outpatient real total medical expenditure increased 2.9 fold compared with 2008 costs. The growth rates of inpatient and outpatient real total medical expenditures showed downward trends. Inpatient and outpatient real total medical expenditure increased at average annual rates of 18.2% and 14.4%, respectively, between 2008 and 2013, and dropped to 9.1% and 8.3% between 2013 and 2018. The average annual growth rates of hospital service volume and service price and intensity also displayed downward trends, while the average annual growth rate of hospital service volume outpaced that of service price and intensity in the same period. Similar trends occurred after adjusting for population growth. (For more detailed data on average medical expenditures and service utilization for inpatient and outpatient care, see online appendix exhibit 2).

**Table 2 Medical expenditures and service volumes for public hospital inpatient and outpatient care in China (2008-18)**

|                                | Inpatient                                          |                                 |                                      | Outpatient                                         |                             |                     |
|--------------------------------|----------------------------------------------------|---------------------------------|--------------------------------------|----------------------------------------------------|-----------------------------|---------------------|
|                                | Real total<br>medical<br>exp.<br>(billion<br>yuan) | Exp. per<br>admission<br>(yuan) | Admissions <sup>1</sup><br>(million) | Real total<br>medical<br>exp.<br>(billion<br>yuan) | Exp. per<br>visit<br>(yuan) | Visits<br>(million) |
| 2008                           | 456.8                                              | 6678.7                          | 68.4                                 | 285.0                                              | 172.8                       | 1649.1              |
| 2009                           | 571.2                                              | 7344.5                          | 77.8                                 | 338.3                                              | 191.3                       | 1768.9              |
| 2010                           | 676.2                                              | 7789.8                          | 86.8                                 | 380.6                                              | 203.1                       | 1873.8              |
| 2011                           | 770.4                                              | 7960.4                          | 96.8                                 | 426.1                                              | 207.6                       | 2052.5              |
| 2012                           | 930.6                                              | 8224.8                          | 113.1                                | 497.0                                              | 217.2                       | 2288.7              |
| 2013                           | 1054.3                                             | 8600.1                          | 122.6                                | 558.6                                              | 227.5                       | 2455.1              |
| 2014                           | 1190.1                                             | 8894.5                          | 133.8                                | 629.4                                              | 237.7                       | 2647.4              |
| 2015                           | 1278.5                                             | 9345.6                          | 136.8                                | 675.0                                              | 248.8                       | 2712.4              |
| 2016                           | 1406.1                                             | 9573.9                          | 146.9                                | 728.1                                              | 255.7                       | 2847.7              |
| 2017                           | 1517.6                                             | 9764.2                          | 155.4                                | 774.9                                              | 262.5                       | 2952.0              |
| 2018                           | 1629.1                                             | 9976.4                          | 163.3                                | 830.5                                              | 272.2                       | 3051.2              |
| <b>Annual growth rates (%)</b> |                                                    |                                 |                                      |                                                    |                             |                     |
| 2008-13                        | 18.2                                               | 5.2                             | 12.4                                 | 14.4                                               | 5.6                         | 8.3                 |
| 2013-18                        | 9.1                                                | 3.0                             | 5.9                                  | 8.3                                                | 3.7                         | 4.4                 |

**NOTES** Expenditures per admission discharged or per visit, admission or visit volume data were extracted from the China Health Statistical Yearbooks in 2009-2019. Total medical expenditure represents the authors' analysis of data based on the above equation. <sup>1</sup>Numbers of inpatients who were discharged from public hospitals.

Figure 1 tracks a 1172.3 billion yuan and a 545.5 billion yuan increase in inpatient and outpatient real total medical expenditures, respectively, for public hospitals from 2008 through 2018. (The exchange rate in 2018 was 6.6 Chinese yuan to one US dollar.) From 2008 to 2018, the increase in admission volume was associated with a 67.4 % (790.3

1  
2  
3  
4 billion yuan) of the observed increase in inpatient real total medical  
5  
6 expenditure, while the change in price and intensity was associated with  
7  
8 the remaining 32.6% (382.0 billion yuan). The increase in visit volume  
9  
10 was associated with a 57.2% (312.0 billion yuan) of the observed increase  
11  
12 in outpatient real total medical expenditure, while the change in service  
13  
14 price and intensity was associated with the remaining 42.8% (233.5  
15  
16 billion yuan).  
17  
18  
19  
20  
21

22 Figure 2 shows that the real average medical expenditure (per capita)  
23  
24 on inpatient care rose by 823.5 yuan from 2008 to 2018, from 343.9 yuan  
25  
26 in 2008 to 1167.5 yuan in 2018. The contribution of growth in service  
27  
28 utilization (more admissions discharged per capita) to the growth in  
29  
30 real average medical expenditure on inpatient care was 66.3% (545.7 yuan  
31  
32 of the 823.5 yuan increase), while the increase in price and intensity  
33  
34 was associated with the remaining 33.7% (277.9 yuan of the 823.5 yuan)  
35  
36 increase. The real average medical expenditure on outpatient care  
37  
38 increased by 380.6 yuan between 2008 and 2018, from 214.6 yuan in 2008  
39  
40 to 595.2 yuan in 2018. Rising service utilization contributed to 55.2%  
41  
42 of the growth in real average medical expenditure on outpatient care,  
43  
44 compared to rising price and intensity, which contributed 44.8%.  
45  
46  
47  
48  
49  
50  
51

52  
53 For public hospitals' inpatient and outpatient care in 31 provinces,  
54  
55 autonomous regions and municipalities of mainland China, growth in  
56  
57 service volume contributed more than growth in service price and  
58  
59  
60

1  
2  
3  
4 intensity to the growth in real total medical expenditures in public  
5  
6 hospital inpatient and outpatient care for most provinces from 2011 to  
7  
8 2018 (Table 3a). For inpatient care, the growth in service volume  
9  
10 contributed more than the growth in service price and intensity to the  
11  
12 growth in real total medical expenditures for all provinces except Tibet.  
13  
14 For example, growth in service volume was associated with 87.3% of the  
15  
16 observed growth in real total medical expenditure in the inpatient sector  
17  
18 in Zhejiang province (38.2 billion yuan of the 43.8 billion yuan  
19  
20 increase). For outpatient care, growth in service volume contributed  
21  
22 more to growth in public hospital outpatient real total medical  
23  
24 expenditures for most provinces (23 of the 31 provinces). Trends were  
25  
26 similar in the decompositions of real average medical expenditures for  
27  
28 public hospitals' inpatient and outpatient care in 31 provinces,  
29  
30 autonomous regions and municipalities (Table 3b).  
31  
32  
33  
34  
35  
36  
37  
38  
39  
40  
41  
42  
43  
44  
45  
46  
47  
48  
49  
50  
51  
52  
53  
54  
55  
56  
57  
58  
59  
60

**Table 3a Decompositions of total medical expenditures for public hospitals' inpatient and outpatient care in 31 provinces, autonomous regions and municipalities of mainland China during 2011-2018**

| Province       | Inpatient      |                     | Outpatient     |                     |
|----------------|----------------|---------------------|----------------|---------------------|
|                | service volume | Price and intensity | service volume | price and intensity |
| All            | 69.5           | 30.5                | 59.2           | 40.8                |
| Beijing        | 77.7           | 22.3                | 51.5           | 48.5                |
| Tianjin        | 70.0           | 30.0                | 47.7           | 52.3                |
| Hebei          | 56.7           | 43.3                | 67.2           | 32.8                |
| Shanxi         | 62.4           | 37.6                | 60.8           | 39.2                |
| Inner Mongolia | 78.5           | 21.5                | 66.5           | 33.5                |
| Liaoning       | 65.9           | 34.1                | 48.3           | 51.7                |
| Jilin          | 54.8           | 45.2                | 45.2           | 54.8                |
| Heilongjiang   | 72.2           | 27.8                | 54.7           | 45.3                |
| Shanghai       | 74.5           | 25.5                | 58.2           | 41.8                |
| Jiangsu        | 77.7           | 22.3                | 60.5           | 39.5                |
| Zhejiang       | 87.3           | 12.7                | 70.6           | 29.4                |
| Anhui          | 76.1           | 23.9                | 65.3           | 34.7                |
| Fujian         | 56.9           | 43.1                | 45.0           | 55.0                |
| Jiangxi        | 59.6           | 40.4                | 46.1           | 53.9                |
| Shandong       | 62.6           | 37.4                | 68.1           | 31.9                |
| Henan          | 59.8           | 40.2                | 59.0           | 41.0                |
| Hubei          | 67.4           | 32.6                | 70.4           | 29.6                |
| Hunan          | 66.2           | 33.8                | 61.5           | 38.5                |
| Guangdong      | 65.1           | 34.9                | 36.0           | 64.0                |
| Guangxi        | 63.8           | 36.2                | 58.1           | 41.9                |
| Hainan         | 68.9           | 31.1                | 55.7           | 44.3                |
| Chongqing      | 76.1           | 23.9                | 59.1           | 40.9                |
| Sichuan        | 68.9           | 31.1                | 59.8           | 40.2                |
| Guizhou        | 82.3           | 17.7                | 76.0           | 24.0                |
| Yunnan         | 79.6           | 20.4                | 58.1           | 41.9                |
| Tibet          | 49.3           | 50.7                | 34.7           | 65.3                |
| Shaanxi        | 75.1           | 24.9                | 63.4           | 36.6                |
| Gansu          | 83.4           | 16.6                | 65.1           | 34.9                |
| Qinghai        | 66.7           | 33.3                | 37.5           | 62.5                |
| Ningxia        | 75.9           | 24.1                | 58.7           | 41.3                |
| Xinjiang       | 69.0           | 31.0                | 63.7           | 36.3                |



**Table 3b Decompositions of average medical expenditures for public hospitals' inpatient and outpatient care in 31 provinces, autonomous regions and municipalities of mainland China during 2011-2018**

| Province       | Inpatient           |                     | Outpatient          |                     |
|----------------|---------------------|---------------------|---------------------|---------------------|
|                | service utilization | price and intensity | service utilization | price and intensity |
| All            | 68.0                | 32.0                | 57.0                | 43.0                |
| Beijing        | 75.6                | 24.4                | 45.3                | 54.7                |
| Tianjin        | 60.6                | 39.4                | 18.6                | 81.4                |
| Hebei          | 54.3                | 45.7                | 65.3                | 34.7                |
| Shanxi         | 60.6                | 39.4                | 58.8                | 41.2                |
| Inner Mongolia | 77.9                | 22.1                | 65.6                | 34.4                |
| Liaoning       | 66.2                | 33.8                | 48.8                | 51.2                |
| Jilin          | 55.9                | 44.1                | 46.5                | 53.5                |
| Heilongjiang   | 73.0                | 27.0                | 56.3                | 43.7                |
| Shanghai       | 73.3                | 26.7                | 55.6                | 44.4                |
| Jiangsu        | 77.1                | 22.9                | 59.3                | 40.7                |
| Zhejiang       | 86.3                | 13.7                | 67.8                | 32.2                |
| Anhui          | 74.0                | 26.0                | 63.0                | 37.0                |
| Fujian         | 52.6                | 47.4                | 40.2                | 59.8                |
| Jiangxi        | 58.1                | 41.9                | 43.7                | 56.3                |
| Shandong       | 60.4                | 39.6                | 66.1                | 33.9                |
| Henan          | 58.8                | 41.2                | 57.8                | 42.2                |
| Hubei          | 66.4                | 33.6                | 69.3                | 30.7                |
| Hunan          | 64.2                | 35.8                | 59.1                | 40.9                |
| Guangdong      | 61.3                | 38.7                | 27.0                | 73.0                |
| Guangxi        | 61.3                | 38.7                | 54.7                | 45.3                |
| Hainan         | 65.7                | 34.3                | 51.6                | 48.4                |
| Chongqing      | 74.3                | 25.7                | 56.3                | 43.7                |
| Sichuan        | 67.6                | 32.4                | 58.2                | 41.8                |
| Guizhou        | 81.7                | 18.3                | 75.2                | 24.8                |
| Yunnan         | 78.5                | 21.5                | 56.1                | 43.9                |
| Tibet          | 43.9                | 56.1                | 26.1                | 73.9                |
| Shaanxi        | 74.5                | 25.5                | 61.9                | 38.1                |
| Gansu          | 83.0                | 17.0                | 64.1                | 35.9                |
| Qinghai        | 64.8                | 35.2                | 32.2                | 67.8                |
| Ningxia        | 73.9                | 26.1                | 54.8                | 45.2                |
| Xinjiang       | 62.6                | 37.4                | 56.5                | 43.5                |

**NOTES:** Provincial expenditures per admission discharged or per visit,

1  
2  
3  
4 admission or visit volume data were only available since 2011 from the  
5  
6 China Health Statistical Yearbooks in 2012–2019. Numbers in italics are  
7  
8 outliers where the contribution of service volume or service utilization  
9  
10 is less than that of price and intensity.  
11  
12  
13  
14  
15  
16

## 17 **Discussion**

18  
19 This study measured the increases of inpatient and outpatient real total  
20  
21 and average medical expenditures of public hospitals as well as how  
22  
23 service use and price were collectively associated with these increases  
24  
25 from 2008 to 2018. Our results showed that the inpatient and outpatient  
26  
27 real total medical expenditures of public hospitals increased annually,  
28  
29 but the growth rate decreased. The growth in service volume explains  
30  
31 more of the growth in the real total medical expenditures of public  
32  
33 hospitals in China than growth in service price and intensity, especially  
34  
35 for inpatient care. After adjusting for population growth, our study  
36  
37 found a similar pattern.  
38  
39  
40  
41  
42  
43  
44

45 The average annual growth rate of inpatient and outpatient real total  
46  
47 medical expenditures of public hospitals decreased by nearly half from  
48  
49 2013 to 2018 compared to the period from 2008 to 2013. This finding is  
50  
51 consistent with the goal of containing the unreasonable growth of medical  
52  
53 expenditures in public hospital reform since 2012.<sup>[20]</sup> Empirical studies  
54  
55 in Beijing<sup>[16, 21]</sup> and Guangdong<sup>[22]</sup> showed the same trend. Payment method  
56  
57  
58  
59  
60

1  
2  
3  
4 reforms since 2011 also played a role in containing the unreasonable  
5  
6 growth of public hospital expenses.<sup>[23]</sup>  
7  
8

9 Our findings of the major driver of hospital medical expenditures differ  
10  
11 from those of Zhai et al., who, using data for the period 1993–2012,  
12  
13 reported that the contribution of increasing health expenditure per  
14  
15 prevalent case to the growth in health expenditures was more than 70%.<sup>[6]</sup>  
16  
17 This study contradicts our finding that approximately 70% of the increase  
18  
19 in the inpatient real total medical expenditure of public hospitals was  
20  
21 associated with service volume, based on data for the period 2008–2018.  
22  
23 A number of differences can contribute to varying results across studies,  
24  
25 such as a different perspective (e.g., cost of disease vs. hospital care)  
26  
27 and component factors. A key source of differences may be varying time  
28  
29 periods. Yip et al.'s results closely parallel ours. Using data for the  
30  
31 period 2008–2017, Yip et al. found that the increase in service volume  
32  
33 accounted for approximately 70% of the increase in total health spending  
34  
35 in China.<sup>[7]</sup> Addressing drivers of the increase in service volume, Moses  
36  
37 et al.'s decomposition of change in volume of outpatient visits and  
38  
39 inpatient admissions by countries from 1990–2016 showed that more than  
40  
41 80% of the increase in volume of outpatient visits and inpatient  
42  
43 admissions was due to an increase in age-sex utilization rates, and less  
44  
45 than 20% could be attributed to changes in the other 3 factors (population  
46  
47 growth, population ageing, and sex composition).<sup>[24]</sup>  
48  
49  
50  
51  
52  
53  
54  
55  
56  
57  
58  
59  
60

1  
2  
3  
4 One study indicated that the need factor (i.e., whether one had a chronic  
5  
6 disease or not) was a dominant determining factor for health service  
7  
8 utilization among rural residents in China.<sup>[25]</sup> According to the China  
9  
10 National Health Services Survey, the prevalence of chronic diseases  
11  
12 increased from 15.7% in 2008 to 34.3% 2018. Coupled with the soaring  
13  
14 real gross domestic product and declining share of out-of-pocket spending  
15  
16 on health services, the affordability of health services has  
17  
18 improved<sup>[7], [26]</sup>. An extensive body of literature highlights the impact  
19  
20 that expanding China's basic medical insurance has had on increasing  
21  
22 health service use, especially inpatient services.<sup>[27-31]</sup> It is plausible  
23  
24 that rising health service utilization is related to the increase in  
25  
26 the underlying need for and improvements in affordability of public  
27  
28 hospital service. However, the increase in health service utilization  
29  
30 may also be supply-induced.

31  
32  
33  
34  
35  
36  
37  
38  
39  
40 This study has several limitations. First, the analysis relies on  
41  
42 government administrative data, which may be subject to reporting errors.  
43  
44  
45  
46 Second, due to the lack of a price index specific to the health sector  
47  
48 in China, this study cannot distinguish between the contributions of  
49  
50 service price and service intensity. Third, further research is needed  
51  
52 to identify the sources of the increase in public hospital medical  
53  
54 expenditures by types of conditions and by controlling for ageing, which  
55  
56 could provide crucial evidence for decision makers.  
57  
58  
59  
60

## Conclusions

We concluded that service use, rather than price, appears to be the major driver of China's hospital medical expenditure increase. In the coming years, health service utilization is likely to accelerate due to the ageing population and the increased burden of noncommunicable diseases. A study of China's health expenditure projections showed that the increase in services per case of disease and unit cost would contribute 4.3 and 2.4 percentage points, respectively, of the 8.4% annual average growth rate in health expenditure during 2015–2035.<sup>[32]</sup> Controlling price growth is crucial, but its effect on containing medical costs would be limited. Controlling service utilization would be essential through a nationwide effort for a healthy population, which would include disease prevention, healthy ageing, ensuring quality care and improving unreasonable healthcare demands.<sup>[33],[34]</sup> Positive incentive mechanisms should be established to enhance an integrated medical and long-term care delivery system, which would be expected to increase growth in outpatient and long-term care in primary facilities and prevent unnecessary hospitalization.

## Author Contributions

YX and LY designed and conceptualized the study. YX conducted the acquisition, analysis and interpretation of data, and drafted the manuscript. LY reviewed the manuscript. LJ and RK reviewed and edited

1  
2  
3 the manuscript. All authors read and approved the final manuscript.  
4  
5  
6  
7

### 8 **Funding**

9

10 This research received no specific grant from any funding agency in the  
11  
12 public, commercial or not-for-profit sectors.  
13  
14  
15  
16  
17

### 18 **Competing interests**

19

20  
21 The authors declare that they have no competing interests.  
22  
23  
24  
25

### 26 **Date availability statement**

27

28 All data generated or analyzed during this study are included in this  
29  
30 published article.  
31  
32  
33  
34  
35

### 36 **Patient and public involvement**

37

38 Patients and/or the public were not involved in the design, or conduct,  
39  
40 or reporting or dissemination plans of this research.  
41  
42  
43  
44  
45

### 46 **Patient consent for publication**

47

48 Not required.  
49  
50  
51  
52  
53  
54

### 55 **Ethics approval**

56

57 This study did not require the participation of human subjects. The  
58  
59 information was anonymous, and no data related to individuals were  
60

1  
2  
3  
4 collected or were accessible. As a secondary analysis of existing data,  
5  
6 ethics approval was, therefore, unnecessary.  
7  
8  
9  
10

## 11 **Acknowledgements**

12  
13  
14 We would like to acknowledge Guangyu Hu, Ayan Mao and Zhenzhen Rao for  
15  
16 providing feedback on early paper drafts.  
17  
18  
19  
20  
21

## 22 **References**

- 23  
24  
25 1 Dieleman J, Campbell M, Chapin A, et al. Evolution and patterns of  
26  
27 global health financing 1995–2014: development assistance for health,  
28  
29 and government, prepaid private, and out-of-pocket health spending in  
30  
31 184 countries. *The Lancet*. 2017;389(10083):1981–2004.  
32  
33  
34  
35 2 Fan VY, Savedoff WD. The health financing transition: a conceptual  
36  
37 framework and empirical evidence. *Soc Sci Med*. 2014;105:112–21.  
38  
39  
40  
41 3 Roehrig CS, Rousseau DM. The Growth In Cost Per Case Explains Far  
42  
43 More Of US Health Spending Increases Than Rising Disease Prevalence.  
44  
45 *Health Affairs*. 2011;30(9):1657–63.  
46  
47  
48 4 Starr M, Dominiak L, Aizcorbe A. Decomposing Growth In Spending Finds  
49  
50 Annual Cost Of Treatment Contributed Most To Spending Growth, 1980–2006.  
51  
52 *Health Affairs*. 2014;33(5):823–31.  
53  
54  
55  
56 5 Dieleman JL, Squires E, Bui AL, et al. Factors Associated With  
57  
58 Increases in US Health Care Spending, 1996–2013. *Jama-J Am Med Assoc*.  
59  
60

1  
2  
3  
4 2017;318(17):1668-78.  
5

6 Zhai T, Goss J, Li J. Main drivers of health expenditure growth in  
7  
8 China: a decomposition analysis. BMC Health Services Research.  
9  
10 2017;17(1):185.  
11  
12

13  
14 7 Yip WN, Fu HQ, Chen AT, et al. 10 years of health-care reform in China:  
15  
16 progress and gaps in Universal Health Coverage. Lancet.  
17  
18 2019;394(10204):1192-204.  
19  
20

21  
22 8 The National Health Commission. China Health Statistical Yearbook.  
23  
24 Beijing,China: Peking Union Medical College Press; 2019.  
25

26  
27 9 Xu J, Jian W, Zhu K, et al. Reforming public hospital financing in  
28  
29 China: progress and challenges. BMJ. 2019;365:l4015.  
30  
31

32  
33 10 Meng QY, Mills A, Wang LD, et al. What can we learn from China's  
34  
35 health system reform? BMJ. 2019;365(12349).  
36

37  
38 11 Zhu D, Shi X, Nicholas S, et al. Impact of China's healthcare price  
39  
40 reforms on traditional Chinese medicine public hospitals in Beijing:  
41  
42 an interrupted time-series study. BMJ open. 2019;9(8):e029646.  
43  
44

45  
46 12 Zhang H, Hu HM, Wu C, et al. Impact of China's Public Hospital  
47  
48 Reform on Healthcare Expenditures and Utilization: A Case Study in ZJ  
49  
50 Province. Plos One. 2015;10(11).  
51

52  
53 13 Wang Y, Zhang Y, Ma C, et al. Limited effects of the comprehensive  
54  
55 pricing healthcare reform in China. Public Health. 2019;175:4-7.  
56  
57

58  
59 14 Tang WX, Xie J, Lu YJ, et al. Effects on the medical revenue of  
60



1  
2  
3  
4 comprehensive pricing reform in Chinese urban public hospitals after  
5  
6 removing drug markups: case of Nanjing. *J Med Econ*. 2018;21(4):326-39.

7  
8  
9 15 Tang S, Han Y, HE G. An empirical study on hospitalization expenses  
10  
11 and its structural changes based on grey correlation analysis method:  
12  
13 A case of the reform of urban public hospitals in Changzhou and Taizhou  
14  
15 cities. *Chinese Journal of Health Policy*. 2019;12(7):36-41.

16  
17  
18  
19 16 Liu X, Xu J, Yuan B, et al. Containing medical expenditure: lessons  
20  
21 from reform of Beijing public hospitals. *BMJ*. 2019;365:12369.

22  
23  
24  
25 17 Fu HQ, Li L, Yip W. Intended and unintended impacts of price changes  
26  
27 for drugs and medical services: Evidence from China. *Social Science &*  
28  
29 *Medicine*. 2018;211:114-22.

30  
31  
32  
33 18 International Monetary Fund. IMF Executive Board Concludes 2019  
34  
35 Article IV Consultation with the People's Republic of China. 2019.

36  
37 Available:

38  
39  
40 [https://www.imf.org/en/News/Articles/2019/08/09/pr19314-china-imf-e](https://www.imf.org/en/News/Articles/2019/08/09/pr19314-china-imf-executive-board-concludes-2019-article-iv-consultation)  
41  
42 [xecutive-board-concludes-2019-article-iv-consultation](https://www.imf.org/en/News/Articles/2019/08/09/pr19314-china-imf-executive-board-concludes-2019-article-iv-consultation) [Accessed 30

43  
44  
45 Sep 2019].

46  
47  
48 19 Das Gupta P. Decomposition of the difference between two rates  
49  
50 and its consistency when more than two populations are involved.  
51  
52 *Mathematical Population Studies:: An International Journal of*  
53  
54 *Mathematical Demography*. 1991;3(2):105-25.

55  
56  
57  
58 20 Xinhua News Agency. Five departments of the State Council jointly  
59  
60

1  
2  
3  
4 issued a document to control the unreasonable increase of medical  
5  
6 expenses in public hospitals. 2015. Available:  
7  
8 [http://www.gov.cn/xinwen/2015-11/06/content\\_5005927.htm](http://www.gov.cn/xinwen/2015-11/06/content_5005927.htm) [Accessed 8  
9  
10  
11 Dec. 2020].

12  
13  
14 21 Li BY, Man XW, Fang YY, et al. Analysis on the Cost Changes of  
15  
16 Total Health Expenditure of Medical Institutions In Beijing During the  
17  
18 12th 5-Year Plan Period. Chinese Journal of Social Medicine.  
19  
20 2018;35(5):107-10.  
21  
22

23  
24 22 Deng J, Song XG, Xu CW, et al. Empirical Analysis and Optimization  
25  
26 Research of Medical Service Price Reform in Urban Public Hospitals of  
27  
28 Guangdong. Chinese Health Economy. 2018;37(7):37-40.  
29  
30

31  
32 23 Yan XL, Rao KQ, Hu LL, et al. Discussions on the progress and  
33  
34 problems of public hospital payment system reforms in China. Chin J Hosp  
35  
36 Admin. 2015;31(2):84-6.  
37  
38

39  
40 24 Moses MW, Pedroza P, Baral R, et al. Funding and services needed  
41  
42 to achieve universal health coverage: applications of global, regional,  
43  
44 and national estimates of utilisation of outpatient visits and inpatient  
45  
46 admissions from 1990 to 2016, and unit costs from 1995 to 2016. Lancet  
47  
48 Public Health. 2019;4(1):E49-E73.  
49  
50

51  
52 25 Li YN, Nong DX, Wei B, et al. The impact of predisposing, enabling,  
53  
54 and need factors in utilization of health services among rural residents  
55  
56 in Guangxi, China. BMC Health Services Research. 2016;16:9.  
57  
58  
59  
60

1  
2  
3  
4 26 Meng Q, Xu L, Zhang Y, et al. Trends in access to health services  
5  
6 and financial protection in China between 2003 and 2011: a  
7  
8 cross-sectional study. *Lancet*. 2012;379(9818):805-14.

9  
10  
11 27 Su D, Chen Y, Gao H, et al. Effect of integrated urban and rural  
12  
13 residents medical insurance on the utilization of medical services by  
14  
15 residents in China: a propensity score matching with  
16  
17 difference-in-differences regression approach. *BMJ Open*.  
18  
19 2019(9):E026408.  
20  
21  
22  
23

24  
25 28 Liu H, Zhao Z. Does health insurance matter? Evidence from China's  
26  
27 urban resident basic medical insurance. *Journal of Comparative Economics*.  
28  
29 2014;42(4):1007-20.  
30  
31

32  
33 29 Zhang YG, Dong D, Xu L, et al. Equity in health care after 10 years  
34  
35 of the New Rural Co-operative Medical Insurance Scheme in China: an  
36  
37 analysis of national survey data. *Lancet*. 2018;392:35-.  
38  
39

40  
41 30 Babiarz KS, Miller G, Yi HM, et al. China's New Cooperative Medical  
42  
43 Scheme Improved Finances Of Township Health Centers But Not The Number  
44  
45 Of Patients Served. *Health Affairs*. 2012;31(5):1065-74.  
46  
47

48  
49 31 Xu J, Wang J, King M, et al. Rural-urban disparities in the  
50  
51 utilization of mental health inpatient services in China: the role of  
52  
53 health insurance. *Int J Health Econ Manag*. 2018;18(4):377-93.  
54  
55

56  
57 32 Zhai TM, Goss J, Dmytraczenko T, et al. China's Health Expenditure  
58  
59 Projections To 2035: Future Trajectory And The Estimated Impact Of  
60

1  
2  
3  
4 Reforms. HEALTH AFFAIRS. 2019;38(5):835-43.  
5

6 33 Meng Y, Yan X, li X, et al. Principal concept and practices and  
7  
8 enlightenment of managing health demand in developed countries.  
9

10 Chinese Journal of Health Management. 2016;10(3):241-5.  
11

12  
13 34 Stadhouders N, Kruse F, Tanke M, et al. Effective healthcare  
14  
15 cost-containment policies: A systematic review. Health Policy.  
16  
17 2019;123(1):71-9.  
18  
19  
20  
21  
22

### 23 **Figure List**

24  
25  
26 Figure 1 Contributions of growth in service volume and price and intensity  
27  
28 to growth in real total medical expenditure of public hospitals,  
29  
30 2008-2018  
31  
32  
33

34  
35  
36 Figure 2 Contributions of growth in service utilization and price and  
37  
38 intensity to growth in real average medical expenditure of public  
39  
40 hospitals, 2008-2018  
41  
42  
43  
44  
45  
46  
47  
48  
49  
50  
51  
52  
53  
54  
55  
56  
57  
58  
59  
60

1  
2  
3  
4  
5  
6  
7  
8  
9  
10  
11  
12  
13  
14  
15  
16  
17  
18  
19  
20  
21  
22  
23  
24  
25  
26  
27  
28  
29  
30  
31  
32  
33  
34  
35  
36  
37  
38  
39  
40  
41  
42  
43  
44  
45  
46  
47  
48  
49  
50  
51  
52  
53  
54  
55  
56  
57  
58  
59  
60

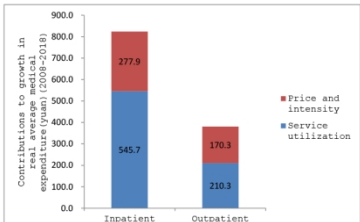

Figure 2 Contributions of growth in service utilization and price and intensity to growth in real average medical expenditure of public hospitals, 2008-2018

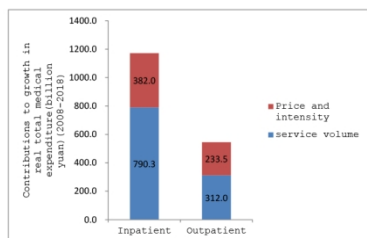

Figure 1 Contributions of growth in service volume and price and intensity to growth in real total medical expenditure of public hospitals, 2008-2018

## Appendix exhibit 1.

### Decomposing Methods

To measure the relative effect of each of the two factors, we used the decomposition method described by Das Gupta<sup>1</sup>. This decomposition was based on the equation above to calculate standardized rates for each factor and then calculate the additive contributions of each factor to annual changes in hospital outpatient or inpatient total expenditure from 2009-2018 (below equations).

$$\Delta TE = TE_{y_1} - TE_{y_0}$$

$$V_a = \frac{P_{y_1} + P_{y_0}}{2} (V_{y_1} - V_{y_0})$$

$$P_a = \frac{V_{y_1} + V_{y_0}}{2} (P_{y_1} - P_{y_0})$$

$$V_r = V_a / \Delta TE * 100\%$$

$$P_r = P_a / \Delta TE * 100\%$$

where  $\Delta TE$  is the change in total expenditures between  $y_1$  and  $y_0$  (e.g., 2008 and 2018).  $V_a$  is the change in total expenditures associated with the change in service volumes;  $P_a$  is the change in total expenditures associated with the change in service price and intensity;  $V_r$  is the relative contribution rate of change in total expenditure due to change in service volume; and  $P_r$  is the relative contribution rate of change in total expenditure due to change in service price and intensity.

1  
2  
3  
4 **Appendix exhibit 2.**

5  
6 **Table 1 After adjustment for population growth, the average medical**  
7  
8 **expenditures and service utilization for public hospital inpatient and**  
9  
10 **outpatient care in China (2008-18)**

|                                | Inpatient                              |                                 |                           | Outpatient                             |                             |                        |
|--------------------------------|----------------------------------------|---------------------------------|---------------------------|----------------------------------------|-----------------------------|------------------------|
|                                | Real average<br>medical<br>exp. (yuan) | Exp. per<br>admission<br>(yuan) | Service<br>utilization(%) | Real average<br>medical<br>exp. (yuan) | Exp. per<br>visit<br>(yuan) | Service<br>utilization |
| 2008                           | 343.9                                  | 6678.7                          | 5.1                       | 214.6                                  | 172.8                       | 1.2                    |
| 2009                           | 428.0                                  | 7344.5                          | 5.8                       | 253.5                                  | 191.3                       | 1.3                    |
| 2010                           | 504.3                                  | 7789.8                          | 6.5                       | 283.9                                  | 203.1                       | 1.4                    |
| 2011                           | 571.8                                  | 7960.4                          | 7.2                       | 316.3                                  | 207.6                       | 1.5                    |
| 2012                           | 687.2                                  | 8224.8                          | 8.4                       | 367.0                                  | 217.2                       | 1.7                    |
| 2013                           | 774.8                                  | 8600.1                          | 9.0                       | 410.5                                  | 227.5                       | 1.8                    |
| 2014                           | 870.1                                  | 8894.5                          | 9.8                       | 460.2                                  | 237.7                       | 1.9                    |
| 2015                           | 930.0                                  | 9345.6                          | 10.0                      | 491.0                                  | 248.8                       | 2.0                    |
| 2016                           | 1016.9                                 | 9573.9                          | 10.6                      | 526.6                                  | 255.7                       | 2.1                    |
| 2017                           | 1091.7                                 | 9764.2                          | 11.2                      | 557.5                                  | 262.5                       | 2.1                    |
| 2018                           | 1167.5                                 | 9976.4                          | 11.7                      | 595.2                                  | 272.2                       | 2.2                    |
| <b>Annual growth rates (%)</b> |                                        |                                 |                           |                                        |                             |                        |
| 2008-13                        | 17.6                                   | 5.2                             | 11.8                      | 13.8                                   | 5.6                         | 7.8                    |
| 2013-18                        | 8.5                                    | 3                               | 5.4                       | 7.7                                    | 3.7                         | 3.9                    |

38 **NOTES** Expenditures per admission discharged or per visit, admission or  
39 visit volume data were extracted from the China Health Statistical  
40 Yearbooks in 2009-2019. All expenditure variables in this study were  
41 adjusted for inflation using the economy-wide consumer price index of  
42 China from the International Monetary Fund and were reported in Chinese  
43 yuan in 2018 prices. We expresses service utilization as the admission  
44 or visit volume divided by the population size in a given year, which  
45 was obtained from the China Statistical Yearbook in 2019. The real average  
46 medical expenditures in a given year was medical expenditures per  
47 admission or per visit multiplied by service utilization.  
48  
49  
50  
51  
52  
53  
54  
55  
56  
57  
58  
59  
60



1  
2  
3  
4  
5  
6  
7  
8  
9  
10  
11  
12  
13  
14  
15  
16  
17  
18  
19  
20  
21  
22  
23  
24  
25  
26  
27  
28  
29  
30  
31  
32  
33  
34  
35  
36  
37  
38  
39  
40  
41  
42  
43  
44  
45  
46  
47  
48  
49  
50  
51  
52  
53  
54  
55  
56  
57  
58  
59  
60

**Note**

1. Das Gupta P. Decomposition of the difference between two rates and its consistency when more than two populations are involved. *Mathematical Population Studies: An International Journal of Mathematical Demography*. 1991;3(2):105-25.

For peer review only

# BMJ Open

## What is the major driver of China's hospital medical expenditure growth? A decomposing analysis

|                                 |                                                                                                                                                                                                                                                                                                                                                                                                                                                                                                                                                |
|---------------------------------|------------------------------------------------------------------------------------------------------------------------------------------------------------------------------------------------------------------------------------------------------------------------------------------------------------------------------------------------------------------------------------------------------------------------------------------------------------------------------------------------------------------------------------------------|
| Journal:                        | <i>BMJ Open</i>                                                                                                                                                                                                                                                                                                                                                                                                                                                                                                                                |
| Manuscript ID                   | bmjopen-2020-048308.R1                                                                                                                                                                                                                                                                                                                                                                                                                                                                                                                         |
| Article Type:                   | Original research                                                                                                                                                                                                                                                                                                                                                                                                                                                                                                                              |
| Date Submitted by the Author:   | 25-Jul-2021                                                                                                                                                                                                                                                                                                                                                                                                                                                                                                                                    |
| Complete List of Authors:       | Yan, Xiaoling; Chinese Academy of Medical Sciences & Peking Union Medical College, School of Health Policy and Management; Chinese Academy of Medical Sciences & Peking Union Medical College Institute of Medical Information<br>Liu, Yuanli; Chinese Academy of Medical Sciences & Peking Union Medical College, School of Health Policy and Management<br>Rao, Keqin; China Health Economics Association<br>Li, Jinlei; Chinese Academy of Medical Sciences & Peking Union Medical College, School of Population Medicine and Public Health |
| <b>Primary Subject Heading</b>: | Health economics                                                                                                                                                                                                                                                                                                                                                                                                                                                                                                                               |
| Secondary Subject Heading:      | Health policy, Health services research                                                                                                                                                                                                                                                                                                                                                                                                                                                                                                        |
| Keywords:                       | HEALTH ECONOMICS, Health policy < HEALTH SERVICES ADMINISTRATION & MANAGEMENT, Health economics < HEALTH SERVICES ADMINISTRATION & MANAGEMENT                                                                                                                                                                                                                                                                                                                                                                                                  |
|                                 |                                                                                                                                                                                                                                                                                                                                                                                                                                                                                                                                                |

SCHOLARONE™  
Manuscripts

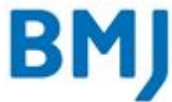

I, the Submitting Author has the right to grant and does grant on behalf of all authors of the Work (as defined in the below author licence), an exclusive licence and/or a non-exclusive licence for contributions from authors who are: i) UK Crown employees; ii) where BMJ has agreed a CC-BY licence shall apply, and/or iii) in accordance with the terms applicable for US Federal Government officers or employees acting as part of their official duties; on a worldwide, perpetual, irrevocable, royalty-free basis to BMJ Publishing Group Ltd ("BMJ") its licensees and where the relevant Journal is co-owned by BMJ to the co-owners of the Journal, to publish the Work in this journal and any other BMJ products and to exploit all rights, as set out in our [licence](#).

The Submitting Author accepts and understands that any supply made under these terms is made by BMJ to the Submitting Author unless you are acting as an employee on behalf of your employer or a postgraduate student of an affiliated institution which is paying any applicable article publishing charge ("APC") for Open Access articles. Where the Submitting Author wishes to make the Work available on an Open Access basis (and intends to pay the relevant APC), the terms of reuse of such Open Access shall be governed by a Creative Commons licence – details of these licences and which [Creative Commons](#) licence will apply to this Work are set out in our licence referred to above.

Other than as permitted in any relevant BMJ Author's Self Archiving Policies, I confirm this Work has not been accepted for publication elsewhere, is not being considered for publication elsewhere and does not duplicate material already published. I confirm all authors consent to publication of this Work and authorise the granting of this licence.

# What is the major driver of China's hospital medical expenditure growth?

## A decomposing analysis

Xiaoling Yan<sup>1,2</sup>, Yuanli Liu<sup>1\*</sup>, Keqin Rao<sup>3</sup> and Jinlei Li<sup>4</sup>

<sup>1</sup> School of Health Policy and Management, Chinese Academy of Medical Sciences and Peking Union Medical College, 5 Dongdantsiantiao, Dongcheng District, Beijing 100730, China; [yanxiaoling08@163.com](mailto:yanxiaoling08@163.com) (X.Y.)

<sup>2</sup> Institute of Medical Information, Chinese Academy of Medical Sciences and Peking Union Medical College, 3 yabao Street, Chaoyang District, Beijing 100020, China

<sup>3</sup> China Health Economics Association, 38 Xueyuan Street, Haidian District, Beijing 100191, China; [uab12345@qq.com](mailto:uab12345@qq.com) (K.R.)

<sup>4</sup> School of Population Medicine and Public Health, Chinese Academy of Medical Sciences and Peking Union Medical College, 5 Dongdantsiantiao, Dongcheng District, Beijing 100730, China; [lijinlei921@126.com](mailto:lijinlei921@126.com) (J.L.)

\* Correspondence: Yuanli Liu; Postal address: 5 Dongdantsiantiao, Dongcheng District, Beijing 100730, China; E-mail: [liuyuanli\\_pumc@163.com](mailto:liuyuanli_pumc@163.com); Tel.: +86-1352-2592-907; Fax: +86-010-65105930.

Word count: 3486

**ABSTRACT**

**Objectives:** This study aimed to quantify increases in the medical expenditures of public hospitals associated with changes in service use and prices, which could inform policy efforts to curb the future growth of hospital medical expenditures.

**Design:** Nationwide and provincial data regarding service volume, service price and intensity of public hospitals' outpatient and inpatient care from 2008 to 2018 were extracted from the China Health Statistical Yearbooks, and population size data were obtained from the 2019 China Statistical Yearbook.

**Methods:** A decomposition analysis was performed to measure the relative effects of changes in service use (volume or its subcomponent factors) and service price and intensity on the increase in the inpatient and outpatient total medical expenditures of public hospitals from 2008 to 2018.

**Results:** After adjusting for price inflation, the total medical expenditure of public hospitals increased by approximately 3-fold from 2008 to 2018. During this period, the increase in service volume was associated with 67.4% of the observed increase in the total medical expenditures in the inpatient sector and 57.2% of the observed increase in the total medical expenditures in the outpatient sector. Most of the service volume effect is due to an increase in the hospital utilization

1  
2  
3  
4 rate. The growth in the utilization rate was associated with 73.7% of  
5  
6 the observed growth in the total medical expenditures in the inpatient  
7  
8 sector and 60.3% of the observed growth in the total medical expenditures  
9  
10 in the outpatient sector.  
11  
12

13  
14 **Conclusion:** Service use, rather than price, appears to be the major driver  
15  
16 of increases in medical expenditures in Chinese hospitals. An important  
17  
18 policy implication for China and other countries with similar drivers  
19  
20 is that the effect of controlling price and intensity growth on containing  
21  
22 medical costs could be limited and controlling service utilization growth  
23  
24 could be essential.  
25  
26  
27  
28  
29  
30

### 31 **Strengths and limitations of this study**

- 32  
33  
34 ● This study extends the existing literature by focusing on the drivers  
35  
36 of growth in public hospitals' medical expenditure during the first  
37  
38 decade of the new round of health system reform in China.  
39  
40
- 41  
42 ● This study decomposed growth in medical expenditure into changes in  
43  
44 its primary policy-relevant constituent factors, i.e., service  
45  
46 volume and price, and subcomponent factors of service volume.  
47  
48
- 49  
50 ● This study provides region-specific decomposition rates of the  
51  
52 sources of the growth in public hospitals' medical expenditure in  
53  
54 31 provinces, autonomous regions and municipalities in mainland  
55  
56 China.  
57  
58
- 59  
60 ● Due to the lack of a price index specific to the health sector in

1  
2  
3  
4 China, this study cannot distinguish between the contributions of  
5  
6 the service price and service intensity.  
7

- 8  
9 ● This study did not consider changes in the types of conditions  
10  
11 prompting people to visit hospitals and the ageing of the population.  
12  
13

## 14 15 16 17 **INTRODUCTION**

18  
19 Medical cost escalation is a major problem in both developed and  
20  
21 developing countries, including China.<sup>1,2</sup> Efforts to contain medical  
22  
23 expenditure growth may benefit from a better understanding of the  
24  
25 underlying drivers of increasing medical costs.  
26  
27

28  
29  
30 Studies decomposing growth in China's health expenditure into its  
31  
32 constituent parts since the 1990s have revealed different results. Zhai  
33  
34 et al.'s study used data from China's National Health Accounts studies  
35  
36 and Global Burden of Disease 2013 studies and decomposed the changes  
37  
38 in health expenditures by disease into population growth, population  
39  
40 ageing, disease prevalence rate, expenditure per case of disease, and  
41  
42 excess health price inflation. These authors found that 72.6% of the  
43  
44 increases in China's health expenditure between 1993 and 2012 was caused  
45  
46 by growth in health expenditure per prevalent case.<sup>3</sup> A recent study by  
47  
48 Yip et al. using China National Health Accounts data decomposed the growth  
49  
50 in health spending by healthcare type into an increase in visit volume  
51  
52 and an increase in charges per visit or admission. The study showed that  
53  
54  
55  
56  
57  
58  
59  
60

1  
2  
3  
4 the increase in visit volume accounted for approximately 70% of the  
5  
6 increase in the total health spending in China between 2008 and 2017,  
7  
8 while increases in charges per visit or admission accounted for  
9  
10 approximately 30% of the increase.<sup>4</sup> These studies examined the drivers  
11  
12 of health expenditure growth in China from different perspectives (cost  
13  
14 of disease or healthcare) during different periods since the 1990s.  
15  
16  
17  
18

19 Some existing studies explored spending drivers in the US,<sup>5,6,7</sup>  
20  
21 Switzerland<sup>8</sup> and Brazil<sup>9</sup> by decomposing growth in spending into its  
22  
23 constituent parts while focusing on two or more factors, including  
24  
25 population growth, population ageing, disease prevalence,  
26  
27 utilization/quantity, and cost/price. Among all these factors in the  
28  
29 decomposing models in the existing literature, the two primary factors  
30  
31 are quantity and price, and the other factors can be considered the  
32  
33 further decomposition of these two factors.  
34  
35  
36  
37  
38  
39

40 As the main body of China's health service delivery system, public  
41  
42 hospitals accounted for 92.8% of hospital inpatient admissions and 92.6%  
43  
44 of hospital ambulatory visits in 2008; the corresponding values decreased  
45  
46 to 81.8% and 85.3% in 2018.<sup>10</sup> Public hospital medical expenditures  
47  
48 accounted for approximately half of the total health expenditures in  
49  
50 2018.<sup>10 11</sup> Cost containment in public hospitals has been a key focus of  
51  
52  
53  
54 China's new round of health system reform since 2009.<sup>4,12</sup> Public hospital  
55  
56 reforms were launched in 2012, including altering provider payment,  
57  
58  
59  
60



1  
2  
3  
4 eliminating drug mark-up, and adjusting fee schedules.<sup>11</sup> A guidance  
5  
6 document to contain excess public hospital medical expenditure growth  
7  
8 issued by the central government in 2015 listed 21 monitoring indicators  
9  
10 of medical cost control for public hospitals.<sup>13</sup> Of these indicators, seven  
11  
12 indicators monitor charges per unit of service (charges per visit,  
13  
14 admission, or case), three indicators monitor service utilization, and  
15  
16 the remaining indicators mainly monitor the share of the cost of drugs,  
17  
18 diagnostic examinations or medical consumables in medical expenditures.  
19  
20 Based on these monitoring indicators, it seems that the assumption  
21  
22 underlying policy decisions was that price and intensity were the primary  
23  
24 drivers of medical costs. However, these reforms did not reduce the  
25  
26 overall medical expenditures.<sup>14 15</sup>

27  
28  
29  
30  
31  
32  
33  
34  
35 Our study extends the existing literature by focusing on the drivers  
36  
37 of the growth of national and provincial total medical expenditures of  
38  
39 public hospitals during the first decade of the new round of health system  
40  
41 reform in China. We focused on the growth in medical expenditure of public  
42  
43 hospitals because most of medical spending is by public hospitals and  
44  
45 because cost containment in public hospitals is the focus of health-care  
46  
47 delivery reform across China. We decompose growth in medical expenditure  
48  
49 into its primary policy-relevant constituent factors to quantify how  
50  
51 much of the growth in real total medical expenditure was attributable  
52  
53 to changes in service volume versus service price and intensity. We also  
54  
55  
56  
57  
58  
59  
60

1  
2  
3  
4 explored the impact of changes in the subcomponent factors of the service  
5  
6 volume, i.e., the population size, hospital utilization rates, and the  
7  
8 share of public hospital utilization, on the growth of public hospitals'  
9  
10 real total medical expenditures. One of the main contributions of this  
11  
12 study is the provision of the region-specific decomposition rates of  
13  
14 31 provinces, autonomous regions and municipalities in mainland China.  
15  
16  
17 The results of this study could inform cost containment policies in China  
18  
19 and other countries that experience soaring medical expenditures.  
20  
21  
22  
23  
24  
25  
26

## 27 **STUDY DATA AND METHODS**

### 32 **Data sources**

33  
34 We extracted eleven years of nationwide data and eight years of provincial  
35  
36 data from the China Health Statistical Yearbooks in 2009–2019 published  
37  
38 by the National Health Commission (originally called the Ministry of  
39  
40 Health).<sup>4 16</sup> We obtained aggregative information of public hospital  
41  
42 medical expenditures per visit or per admission discharged and outpatient  
43  
44 and inpatient service volumes of public and private hospitals per year.<sup>10</sup>  
45  
46  
47  
48 The nationwide and provincial population size data in specific years  
49  
50  
51 between 2008 and 2018 were obtained from the 2019 China Statistical  
52  
53 Yearbook, which provides nationwide and provincial population size data  
54  
55  
56 from 2008 to 2018.<sup>17</sup>  
57  
58  
59  
60

1  
2  
3  
4 We chose 2008 as the base year for the nationwide analysis and 2011  
5  
6 as the base year for the provincial analysis because the earliest  
7  
8 available years of nationwide and provincial public hospitals' service  
9  
10 volume and price and intensity data were 2008 and 2011, respectively.  
11  
12 Additionally, there were significant policy changes in 2009 and 2012  
13  
14 as mentioned above, rendering 2008 and 2011 appropriate as base years.  
15  
16 The year 2018 was selected as the end date for both the nationwide and  
17  
18 provincial analyses because the latest data we could obtain during our  
19  
20 study period was 2018, which was also the period of the first decade  
21  
22 of new round health system reform.  
23  
24  
25  
26  
27  
28  
29  
30  
31

### 32 **Patient and public involvement**

33  
34 The data used for this study were directly harvested from China Health  
35  
36 Statistical Yearbooks and China Statistical Yearbook. Therefore there  
37  
38 was no direct patient and public involvement.  
39  
40  
41  
42  
43  
44

### 45 **Variable definition**

46  
47 In this paper, we use public hospital medical revenue variables as  
48  
49 expenditure indicators. According to the interpretation of the  
50  
51 indicators in the China Health Statistics Yearbook and previous studies,  
52  
53 hospital medical expenditures in this study fall into the following three  
54  
55 categories: medical services, drugs, and diagnostic  
56  
57  
58  
59  
60

1  
2  
3  
4 examinations/medical consumables.<sup>14</sup> All expenditure variables in this  
5  
6 study were adjusted for inflation using the economy-wide consumer price  
7  
8 index of China from the International Monetary Fund and were reported  
9  
10  
11 in Chinese yuan in 2018 prices.<sup>18</sup>  
12  
13

14 Table 1 provides the definitions of the variables used in this study.  
15  
16 For outpatient care, the service volume was defined as the annual volume  
17  
18 of visits to public hospitals; the utilization rate was defined as annual  
19  
20 hospital visits per capita, including public and private hospital visits;  
21  
22 the share of public hospitals' utilization was defined as the fraction  
23  
24 of public hospitals in the number of hospital visits; and price and  
25  
26 intensity was defined as the mean expenditure per visit for public  
27  
28 hospitals. For inpatient care, the service volume was defined as the  
29  
30 annual volume of admissions discharged from public hospitals; the  
31  
32 utilization rate was defined as annual hospital admissions per capita,  
33  
34 including public and private hospital admissions; the share of public  
35  
36 hospitals' utilization was defined as the fraction of public hospitals  
37  
38 in the number of hospital admissions; and price and intensity was defined  
39  
40 as the mean expenditure per admission discharged from public hospitals.  
41  
42  
43  
44  
45  
46  
47  
48  
49  
50  
51  
52  
53  
54  
55  
56  
57

58 **Table 1** Definitions of service volume, utilization rate, share of public  
59  
60

hospitals' utilization, price and intensity, by type of care

| Care type  | Service volume                                                                   | Utilization rate                                                               | Share of public hospitals' utilization                              | Price and intensity                                            |
|------------|----------------------------------------------------------------------------------|--------------------------------------------------------------------------------|---------------------------------------------------------------------|----------------------------------------------------------------|
| Outpatient | Annual volume of visits to public hospitals outpatient and emergency departments | Annual hospital (including public and private hospitals) visits per capita     | The share of public hospitals in the number of hospital visits.     | Public hospitals' medical expenditure per visit                |
| Inpatient  | Annual volume of admissions discharged from public hospitals                     | Annual hospital (including public and private hospitals) admissions per capita | The share of public hospitals in the number of hospital admissions. | Public hospitals' medical expenditure per admission discharged |

### Decomposition methods

The total medical expenditure of public hospitals is the product of two factors: (1) service volume and (2) price and intensity, as shown in the following equation:

$$TME_y = V_y \times P_y,$$

where  $y$  indicates the year;  $TME_y$  is the total medical expenditure;  $V_y$  is the service volume; and  $P_y$  is the service price and intensity.

To measure the relative effect of each factor, we used the decomposition method described by Das Gupta.<sup>19 20</sup> This decomposition was based on the equation above to calculate standardized expenditures for each factor and then calculate their additive contributions to the changes in hospital outpatient or inpatient total medical expenditures from 2008

1  
2  
3  
4 to 2018. (for a more detailed description of the decomposition method,  
5  
6 see online appendix exhibit 1.1).  
7

8  
9 Given that the public hospitals' service volume can be expressed as  
10  
11 the product of the population size, hospital utilization rate, and share  
12  
13 of public hospital utilization (the share of public hospitals in the  
14  
15 number of admissions or visits), its effect on the growth of real total  
16  
17 medical expenditures reflects the subcomponent effects of population  
18  
19 growth, changes in the utilization rate and changes in the share of public  
20  
21 hospital utilization. We further explored the impact of changes in the  
22  
23 population size, utilization rate, and share of public hospital  
24  
25 utilization on the growth of total medical expenditure of public  
26  
27 hospitals by developing a four-factor decomposition model as follows:  
28  
29  
30  
31  
32  
33

$$34 \quad TME_y = Pop_y \times \frac{V_{th,y}}{Pop_y} \times \frac{V_{ph,y}}{V_{th,y}} \times P_y,$$

35  
36 where  $y$  indicates the year;  $TME_y$  is the total medical expenditure of public  
37  
38 hospitals;  $Pop_y$  is the population size;  $V_{th,y}$  is the service volume of all  
39  
40 hospitals (including public and private hospitals);  $V_{ph,y}$  is the service  
41  
42 volume of public hospitals; and  $P_y$  is the service price and intensity  
43  
44 of public hospital care.  
45  
46  
47  
48  
49

50  
51 Then, we calculated their additive contributions to the growth of  
52  
53 public hospital outpatient or inpatient total medical expenditures from  
54  
55 2008 to 2018. The sum of the contributions of the changes in the population  
56  
57 size, utilization rate, and share of public hospitals' utilization was  
58  
59  
60

1  
2  
3  
4 equal to the contribution of the changes in the service volume in the  
5  
6 above two-factor decomposition. (for a more detailed description of the  
7  
8 four-factor decomposition method, see online appendix exhibit 1.2).  
9  
10  
11  
12  
13

## 14 **RESULTS**

15  
16 Both the inpatient and outpatient real total medical expenditures of  
17  
18 public hospitals increased annually from 2008 to 2018 (Table 2). In 2018,  
19  
20 the inpatient real total medical expenditure increased by 3.6-fold,  
21  
22 and the outpatient real total medical expenditure increased 2.9-fold  
23  
24 compared with the costs in 2008. The growth rates of inpatient and  
25  
26 outpatient real total medical expenditures showed downward trends.  
27  
28 Inpatient and outpatient real total medical expenditures increased at  
29  
30 average annual rates of 18.2% and 14.4%, respectively, between 2008  
31  
32 and 2013 and decreased to 9.1% and 8.3% between 2013 and 2018. The average  
33  
34 annual growth rates of public hospitals' service volume and service  
35  
36 price and intensity also displayed downward trends, while the average  
37  
38 annual growth rate of public hospitals' service volume outpaced that  
39  
40 of service price and intensity during the same period.  
41  
42  
43  
44  
45  
46  
47  
48  
49  
50  
51  
52  
53  
54  
55  
56  
57

58 **Table 2** Medical expenditures and service volumes of public hospital  
59  
60

## inpatient and outpatient care in China (2008–18)

|                                | Inpatient                                          |                                 |                                      | Outpatient                                         |                             |                     |
|--------------------------------|----------------------------------------------------|---------------------------------|--------------------------------------|----------------------------------------------------|-----------------------------|---------------------|
|                                | Real total<br>medical<br>exp.<br>(billion<br>yuan) | Exp. per<br>admission<br>(yuan) | Admissions <sup>1</sup><br>(million) | Real total<br>medical<br>exp.<br>(billion<br>yuan) | Exp. per<br>visit<br>(yuan) | Visits<br>(million) |
| 2008                           | 456.8                                              | 6678.7                          | 68.4                                 | 285.0                                              | 172.8                       | 1649.1              |
| 2009                           | 571.2                                              | 7344.5                          | 77.8                                 | 338.3                                              | 191.3                       | 1768.9              |
| 2010                           | 676.2                                              | 7789.8                          | 86.8                                 | 380.6                                              | 203.1                       | 1873.8              |
| 2011                           | 770.4                                              | 7960.4                          | 96.8                                 | 426.1                                              | 207.6                       | 2052.5              |
| 2012                           | 930.6                                              | 8224.8                          | 113.1                                | 497.0                                              | 217.2                       | 2288.7              |
| 2013                           | 1054.3                                             | 8600.1                          | 122.6                                | 558.6                                              | 227.5                       | 2455.1              |
| 2014                           | 1190.1                                             | 8894.5                          | 133.8                                | 629.4                                              | 237.7                       | 2647.4              |
| 2015                           | 1278.5                                             | 9345.6                          | 136.8                                | 675.0                                              | 248.8                       | 2712.4              |
| 2016                           | 1406.1                                             | 9573.9                          | 146.9                                | 728.1                                              | 255.7                       | 2847.7              |
| 2017                           | 1517.6                                             | 9764.2                          | 155.4                                | 774.9                                              | 262.5                       | 2952.0              |
| 2018                           | 1629.1                                             | 9976.4                          | 163.3                                | 830.5                                              | 272.2                       | 3051.2              |
| <b>Annual growth rates (%)</b> |                                                    |                                 |                                      |                                                    |                             |                     |
| 2008–13                        | 18.2                                               | 5.2                             | 12.4                                 | 14.4                                               | 5.6                         | 8.3                 |
| 2013–18                        | 9.1                                                | 3.0                             | 5.9                                  | 8.3                                                | 3.7                         | 4.4                 |

**NOTES** Expenditures per admission discharged or per visit, admission and visit volume data were extracted from the China Health Statistical Yearbooks in 2009–2019. Total medical expenditure represents the authors' analysis of data based on the above equation. <sup>1</sup>Numbers of inpatients who were discharged from public hospitals.

Figure 1 reveals a 1172.3 billion yuan and a 545.5 billion yuan increase in inpatient and outpatient real total medical expenditures, respectively, for public hospitals from 2008 through 2018. (the exchange rate in 2018 was 6.6 Chinese yuan to one US dollar.) From 2008 to 2018, the increase in admission volume was associated with 67.4 % (790.3 billion yuan) of the observed increase in inpatient real total medical expenditure, while the change in price and intensity was associated with the remaining 32.6% (382.0 billion yuan). The increase in visit volume



1  
2  
3  
4 was associated with 57.2% (312.0 billion yuan) of the observed increase  
5  
6 in outpatient real total medical expenditure, while the change in the  
7  
8 service price and intensity was associated with the remaining 42.8%  
9  
10  
11 (233.5 billion yuan).  
12

13  
14 Figure 2 shows growth in the real total medical expenditure associated  
15  
16 with changes in each factor in the four-factor decomposition from 2008  
17  
18 to 2018. The increase in utilization rate contributed 73.7% (863.8  
19  
20 billion yuan of the 1172.0 billion yuan increase) of the growth in the  
21  
22 real total medical expenditure on inpatient care, and 60.3% (328.8  
23  
24 billion yuan of the 545.5 billion yuan increase) of the growth in the  
25  
26 real total medical expenditure on outpatient care. Population growth  
27  
28 was associated with a slight increase in inpatient (4.2%) and outpatient  
29  
30 (4.8%) total medical expenditures, while a lower share of public  
31  
32 hospitals' utilization was associated with a slight reduction in  
33  
34 inpatient (10.9%) and outpatient (8.1%) total medical expenditures.  
35  
36  
37  
38  
39  
40  
41  
42

43 Regarding public hospitals' inpatient and outpatient care in 31  
44  
45 provinces, autonomous regions and municipalities in mainland China,  
46  
47 growth in the service volume contributed more than growth in the service  
48  
49 price and intensity to the growth in the real total medical expenditures  
50  
51 in public hospital inpatient and outpatient care in most provinces from  
52  
53 2011 to 2018 (Table 3a). Regarding inpatient care, the growth in service  
54  
55 volume contributed more than the growth in service price and intensity  
56  
57  
58  
59  
60

1  
2  
3  
4 to the growth in the real total medical expenditures in all provinces  
5  
6 except for Tibet. For example, the growth in service volume was associated  
7  
8 with 87.3% of the observed growth in the real total medical expenditure  
9  
10 in the inpatient sector in Zhejiang Province (38.2 billion yuan of the  
11  
12 43.8 billion yuan increase) . Regarding outpatient care, the growth in  
13  
14 service volume contributed more to growth in public hospital outpatient  
15  
16 real total medical expenditures in most provinces (23 of the 31  
17  
18 provinces).

19  
20  
21  
22  
23  
24  
25 Increases in hospital utilization rates accounted for most increases  
26  
27 in real total medical expenditures on inpatient and outpatient care in  
28  
29 public hospitals in 31 provinces, autonomous regions and municipalities  
30  
31 in mainland China from 2011 to 2018 (Table 3b) . Regarding inpatient care,  
32  
33 increases in hospital utilization rates accounted for the largest  
34  
35 increases in real total medical expenditures of public hospitals in all  
36  
37 31 provinces, autonomous regions and municipalities. Regarding  
38  
39 outpatient care, increases in hospital utilization rates accounted for  
40  
41 the largest increases in real total medical expenditures of public  
42  
43 hospitals in 25 provinces, autonomous regions and municipalities, except  
44  
45 for 6 provinces, autonomous regions and municipalities, where increases  
46  
47 in price and intensity accounted for the largest increases in the real  
48  
49 total medical expenditures of public hospitals. Changes in the share  
50  
51 of public hospital service utilization were associated with reductions  
52  
53  
54  
55  
56  
57  
58  
59  
60

1  
2  
3  
4 in both inpatient and outpatient real total medical expenditures of  
5  
6 public hospitals in 30 provinces, autonomous regions and municipalities,  
7  
8 except for Xinjiang. Changes in the population size were associated with  
9  
10 increases in both inpatient and outpatient real total medical  
11  
12 expenditures of public hospitals in 28 provinces, autonomous regions  
13  
14 and municipalities, except for 3 provinces (Liaoning, Jilin and Heilong).  
15  
16  
17  
18  
19  
20  
21  
22  
23  
24  
25  
26  
27  
28  
29  
30  
31  
32  
33  
34  
35  
36  
37  
38  
39  
40  
41  
42  
43  
44  
45  
46  
47  
48  
49  
50  
51  
52  
53  
54

55 **Table 3a** Contributions of growths in the service volume and price and  
56  
57 intensity to the growths of public hospital real total medical  
58  
59  
60

expenditures on inpatient and outpatient care in 31 provinces, autonomous regions and municipalities in mainland China, 2011–2018

| Province  | Inpatient      |                     | Outpatient     |                     |
|-----------|----------------|---------------------|----------------|---------------------|
|           | Service volume | Price and intensity | Service volume | Price and intensity |
| Beijing   | 77.7           | 22.3                | 51.5           | 48.5                |
| Tianjin   | 70.0           | 30.0                | 47.7           | 52.3*               |
| Hebei     | 56.7           | 43.3                | 67.2           | 32.8                |
| Shanxi    | 62.4           | 37.6                | 60.8           | 39.2                |
| IM        | 78.5           | 21.5                | 66.5           | 33.5                |
| Liaoning  | 65.9           | 34.1                | 48.3           | 51.7*               |
| Jilin     | 54.8           | 45.2                | 45.2           | 54.8*               |
| HLJ       | 72.2           | 27.8                | 54.7           | 45.3                |
| Shanghai  | 74.5           | 25.5                | 58.2           | 41.8                |
| Jiangsu   | 77.7           | 22.3                | 60.5           | 39.5                |
| Zhejiang  | 87.3           | 12.7                | 70.6           | 29.4                |
| Anhui     | 76.1           | 23.9                | 65.3           | 34.7                |
| Fujian    | 56.9           | 43.1                | 45.0           | 55.0*               |
| Jiangxi   | 59.6           | 40.4                | 46.1           | 53.9*               |
| Shandong  | 62.6           | 37.4                | 68.1           | 31.9                |
| Henan     | 59.8           | 40.2                | 59.0           | 41.0                |
| Hubei     | 67.4           | 32.6                | 70.4           | 29.6                |
| Hunan     | 66.2           | 33.8                | 61.5           | 38.5                |
| Guangdong | 65.1           | 34.9                | 36.0           | 64.0*               |
| Guangxi   | 63.8           | 36.2                | 58.1           | 41.9                |
| Hainan    | 68.9           | 31.1                | 55.7           | 44.3                |
| Chongqing | 76.1           | 23.9                | 59.1           | 40.9                |
| Sichuan   | 68.9           | 31.1                | 59.8           | 40.2                |
| Guizhou   | 82.3           | 17.7                | 76.0           | 24.0                |
| Yunnan    | 79.6           | 20.4                | 58.1           | 41.9                |
| Tibet     | 49.3           | 50.7*               | 34.7           | 65.3*               |
| Shaanxi   | 69.5           | 30.5                | 63.4           | 36.6                |
| Gansu     | 81.2           | 18.8                | 65.1           | 34.9                |
| Qinghai   | 60.9           | 39.1                | 37.5           | 62.5*               |
| Ningxia   | 68.8           | 31.2                | 58.7           | 41.3                |
| Xinjiang  | 63.6           | 36.4                | 63.7           | 36.3                |

**Table 3b** Contributions of changes in each factor in the 4-factor decomposition to the growth in real total medical expenditure on public

hospital inpatient and outpatient care in 31 provinces, autonomous regions and municipalities in mainland China, 2011-2018

| Province  | Inpatient |                  |              |                     | Outpatient |                  |              |                     |
|-----------|-----------|------------------|--------------|---------------------|------------|------------------|--------------|---------------------|
|           | Pop. size | Utilization rate | Share of PHU | Price and intensity | Pop. size  | Utilization rate | Share of PHU | Price and intensity |
| Beijing   | 9.5       | 75.2             | -7.0         | 22.2                | 11.5       | 50.8             | -10.8        | 48.6                |
| Tianjin   | 24.4      | 44.6             | 1.2          | 29.8                | 35.8       | 37.2             | -25.4        | 52.4*               |
| Hebei     | 5.6       | 65.2             | -14.3        | 43.6                | 5.9        | 75.1             | -13.9        | 33.0                |
| Shanxi    | 4.7       | 74.3             | -17.0        | 38.0                | 5.0        | 65.1             | -9.5         | 39.3                |
| IM        | 3.0       | 82.6             | -7.2         | 21.6                | 3.0        | 69.5             | -6.0         | 33.5                |
| Liaoning  | -1.0      | 92.3             | -25.8        | 34.6                | -1.1       | 71.0             | -22.0        | 52.1                |
| Jilin     | -2.6      | 79.1             | -22.2        | 45.8                | -2.6       | 58.5             | -11.0        | 55.1                |
| HLJ       | -2.9      | 98.3             | -23.6        | 28.1                | -3.9       | 78.0             | -19.7        | 45.6                |
| Shanghai  | 4.6       | 72.0             | -2.0         | 25.5                | 6.0        | 55.1             | -2.9         | 41.8                |
| Jiangsu   | 2.9       | 85.4             | -10.7        | 22.5                | 3.1        | 69.6             | -12.3        | 39.7                |
| Zhejiang  | 7.6       | 88.8             | -9.1         | 12.7                | 9.1        | 72.1             | -10.7        | 29.4                |
| Anhui     | 8.5       | 82.0             | -14.5        | 24.0                | 7.0        | 65.6             | -7.3         | 34.7                |
| Fujian    | 9.4       | 57.5             | -9.9         | 43.1                | 8.3        | 40.1             | -3.3         | 54.9*               |
| Jiangxi   | 4.0       | 65.2             | -9.8         | 40.6                | 4.4        | 48.8             | -7.2         | 54.0*               |
| Shandong  | 5.9       | 70.4             | -13.9        | 37.6                | 6.2        | 73.3             | -11.5        | 32.0                |
| Henan     | 2.6       | 76.5             | -20.0        | 40.9                | 3.0        | 72.2             | -16.7        | 41.5                |
| Hubei     | 3.3       | 73.6             | -9.7         | 32.8                | 4.0        | 71.7             | -8.7         | 32.9                |
| Hunan     | 6.0       | 79.4             | -19.5        | 34.2                | 6.3        | 68.1             | -13.1        | 38.7                |
| Guangdong | 10.3      | 60.6             | -5.8         | 34.8                | 12.5       | 26.9             | -3.3         | 63.9*               |
| Guangxi   | 6.9       | 63.8             | -7.0         | 36.3                | 7.9        | 52.8             | -2.5         | 41.8                |
| Hainan    | 9.8       | 70.1             | -11.0        | 31.1                | 8.8        | 52.9             | -5.9         | 44.3                |
| Chongqing | 7.8       | 92.9             | -25.1        | 24.4                | 6.9        | 60.4             | -8.3         | 40.9                |
| Sichuan   | 4.6       | 80.4             | -16.4        | 31.4                | 4.2        | 63.3             | -7.8         | 40.3                |
| Guizhou   | 4.0       | 92.8             | -14.8        | 18.0                | 3.9        | 84.7             | -12.9        | 24.3                |
| Yunnan    | 5.5       | 83.0             | -9.0         | 20.5                | 5.0        | 59.5             | -6.5         | 41.9                |
| Tibet     | 10.8      | 55.5             | -17.5        | 51.3                | 12.1       | 36.6             | -14.3        | 65.6*               |
| Shaanxi   | 3.8       | 80.0             | -14.6        | 30.8                | 4.2        | 65.1             | -6.0         | 36.6                |
| Gansu     | 3.3       | 86.9             | -9.0         | 18.9                | 3.3        | 67.9             | -6.2         | 34.9                |
| Qinghai   | 7.2       | 65.4             | -11.8        | 39.3                | 8.0        | 42.0             | -12.7        | 62.7*               |
| Ningxia   | 11.2      | 77.7             | -20.3        | 31.5                | 9.2        | 57.8             | -8.3         | 41.3                |
| Xinjiang  | 20.9      | 42.7             | 0.1          | 36.2                | 17.2       | 43.2             | 3.6          | 36.0                |

**NOTES:** IM is Inner Mongolia, HLJ is Heilongjiang, Pop size is population size, Share of PHU is the share of public hospitals' utilization. Provincial expenditures per admission discharged or per visit, admission and visit volume data have only been available since 2011 from the China Health Statistical Yearbooks in 2012-2019. \* The exception of provinces where increases in price and intensity accounted for the largest increases in the real total medical expenditures of

1  
2  
3 public hospitals.  
4  
5  
6  
7

## 8 **Discussion**

9

10 This study measured the increases in inpatient and outpatient real total  
11 medical expenditures of public hospitals and how service use and price  
12 were collectively associated with these increases from 2008 to 2018.  
13 Our results show that the inpatient and outpatient real total medical  
14 expenditures of public hospitals increased annually, but the growth rate  
15 decreased. The growth in service use explains more of the growth in the  
16 real total medical expenditures of public hospitals in China than the  
17 growth in service price and intensity, especially for inpatient care.  
18  
19  
20  
21  
22  
23  
24  
25  
26  
27  
28  
29

30  
31 The annual growth rate of inpatient and outpatient real total medical  
32 expenditures of public hospitals decreased by nearly half from 2013 to  
33 2018 compared to that during the period from 2008 to 2013. This finding  
34 is consistent with the goal of containing the excess growth of medical  
35 expenditures of public hospital reform since 2012.<sup>13</sup> Empirical studies  
36 in Beijing<sup>21 22</sup> and Guangdong<sup>23</sup> showed the same trend. Payment method  
37 reforms since 2011 have played a role in containing the excess growth  
38 of public hospital expenses.<sup>24</sup>  
39  
40  
41  
42  
43  
44  
45  
46  
47  
48  
49  
50

51 Our findings of the major drivers of public hospitals' medical  
52 expenditures differ from those reported by Zhai et al., who used data  
53 from the 1993-2012 period and reported that the contribution of  
54 increasing health expenditure per prevalent case to the growth in health  
55  
56  
57  
58  
59  
60

1  
2  
3  
4 expenditures was more than 70%.<sup>3</sup> This study contradicts our finding that  
5  
6 approximately 70% of the increase in the inpatient real total medical  
7  
8 expenditure of public hospitals was associated with the service volume  
9  
10 based on data from the 2008–2018 period. Several differences can  
11  
12 contribute to the varying results across the studies, such as different  
13  
14 perspectives (e.g., cost of disease vs. hospital care) and component  
15  
16 factors. A key source of the differences may be the varying time periods.  
17  
18 Yip et al.'s results closely parallel ours. Using data from the 2008–2017  
19  
20 period, Yip et al. found that the increase in service volume accounted  
21  
22 for approximately 70% of the increase in total health spending in China.<sup>4</sup>  
23  
24  
25  
26  
27  
28

29  
30 Our findings also suggest that most of the service volume effect is  
31  
32 due to an increase in the hospital utilization rate. Our findings closely  
33  
34 parallel Moses et al.'s<sup>25</sup> results. Moses et al.'s decomposition of change  
35  
36 in the volume of outpatient visits and inpatient admissions by countries  
37  
38 from 1990–2016 showed that in China, more than 80% of the increase in  
39  
40 volume of outpatient visits and inpatient admissions was due to an  
41  
42 increase in age-sex utilization rates, and less than 20% could be  
43  
44 attributed to changes in the other three factors (population growth,  
45  
46 population ageing, and sex composition).<sup>25</sup>  
47  
48  
49  
50  
51  
52

53  
54 Is the increase in service use acceptable? One study indicated that  
55  
56 the need factor (i.e., whether one had a chronic disease) was a dominant  
57  
58 factor determining health service utilization among rural residents in  
59  
60

1  
2  
3  
4 China.<sup>26</sup> According to the China National Health Services Survey, the  
5  
6 prevalence of chronic diseases among respondents aged 65 and above  
7  
8 increased from 46.8% in 2008 to 62.3% in 2018.<sup>27 28</sup> The share of population  
9  
10 aged 65 and above increased from 8.3% in 2008 to 11.9% in 2018.<sup>17</sup> Coupled  
11  
12 with the soaring real gross domestic product and declining share of  
13  
14 out-of-pocket spending on health services, the affordability of health  
15  
16 services has improved.<sup>4,29</sup> An extensive body of literature highlights the  
17  
18 impact of expanding China's basic medical insurance on increasing health  
19  
20 service use, especially inpatient services.<sup>30-34</sup> It is plausible that  
21  
22 rising hospital service utilization is related to the increase in the  
23  
24 underlying need for and improvements in access to hospital services.  
25  
26 However, the increase in health service utilization may also be  
27  
28 supply-induced.<sup>35</sup> However, because underutilization was a concern before  
29  
30 the health system reform initiated in 2009, the increase in hospital  
31  
32 service utilization currently represents as improvements in access.  
33  
34 Therefore, the increase in service use is acceptable.  
35  
36  
37  
38  
39  
40  
41  
42  
43

44  
45 These findings inform health policy makers, whose current cost contains  
46  
47 tools mainly to control the cost per visit or per admission,<sup>13</sup> that  
48  
49 controlling price and intensity growth are crucial, but their effect  
50  
51 on containing medical costs could be limited. In the coming years, health  
52  
53 service utilization is likely to increase due to the ageing population  
54  
55 and the increased burden of noncommunicable diseases. A study of China's  
56  
57  
58  
59  
60



1  
2  
3  
4 health expenditure projections showed that the increase in services per  
5  
6 case of disease and unit cost would contribute 4.3 and 2.4 percentage  
7  
8 points, respectively, of the 8.4% annual average growth rate in health  
9  
10 expenditure during the 2015–2035 period.<sup>36</sup> Controlling service  
11  
12 utilization growth could be essential through a nationwide effort for  
13  
14 a healthy population, which could include disease prevention, healthy  
15  
16 ageing, ensuring quality care and minimizing unreasonable healthcare  
17  
18 demands.<sup>37,38</sup> Positive incentive mechanisms should be established to  
19  
20 enhance an integrated medical and long-term care delivery system, which  
21  
22 would be expected to increase growth in outpatient and long-term care  
23  
24 in primary facilities and prevent unnecessary hospitalization.  
25  
26  
27  
28  
29  
30  
31

32 However, this study has several limitations. First, the analysis relies  
33  
34 on government administrative data, which may be subject to reporting  
35  
36 errors. Second, due to the lack of a price index specific to the health  
37  
38 sector in China, this study cannot distinguish between the contributions  
39  
40 of service price and service intensity. Third, further research is needed  
41  
42 to identify the sources of the increase in public hospital medical  
43  
44 expenditures by type of condition and by controlling for ageing, which  
45  
46 could provide crucial evidence for decision makers.  
47  
48  
49  
50  
51  
52  
53  
54  
55

## 56 **Conclusions**

57  
58 We conclude that service use, rather than price, appears to be the major  
59  
60

1  
2  
3  
4 driver of the increases in China's hospital medical expenditures. An  
5  
6 important policy implication for China and other countries with similar  
7  
8 drivers is that the effect of controlling price and intensity growth  
9  
10 on containing medical costs could be limited and controlling service  
11  
12 utilization growth could be essential.  
13  
14  
15  
16  
17  
18

### 19 **Author Contributions**

20  
21 YX and LY designed and conceptualized the study. YX conducted the  
22  
23 acquisition, analysis and interpretation of the data and drafted the  
24  
25 manuscript. LY reviewed the manuscript. LJ and RK reviewed and edited  
26  
27 the manuscript. All authors read and approved the final manuscript.  
28  
29  
30

### 31 **Funding**

32  
33 This research received no specific grants from any funding agency in  
34  
35 the public, commercial or not-for-profit sectors.  
36  
37  
38  
39  
40

### 41 **Competing interests**

42  
43 The authors declare that they have no competing interests.  
44  
45  
46  
47  
48

### 49 **Date availability statement**

50  
51 Raw data used in our study are publicly available, and all data sources  
52  
53 have been cited in the methods section. The data used to support the  
54  
55 findings of this study are available from the corresponding author upon  
56  
57 request.  
58  
59  
60

1  
2  
3  
4  
5  
6 **Patient consent for publication**  
7

8  
9 Not required.  
10  
11  
12  
13

14 **Ethics statement**  
15

16  
17 No human participants included.  
18  
19  
20  
21

22 **Acknowledgements**  
23

24 We would like to acknowledge Guangyu Hu, Ayan Mao and Zhenzhen Rao for  
25  
26 providing feedback on early paper drafts.  
27  
28  
29  
30  
31

32 **References**  
33

- 34  
35 1. Dieleman J, Campbell M, Chapin A, et al. Evolution and patterns of  
36  
37 global health financing 1995-2014: development assistance for  
38  
39 health, and government, prepaid private, and out-of-pocket health  
40  
41 spending in 184 countries. *The Lancet* 2017;389(10083):1981-2004.  
42  
43 doi: 10.1016/s0140-6736(17)30874-7  
44  
45  
46  
47  
48 2. Fan VY, Savedoff WD. The health financing transition: a conceptual  
49  
50 framework and empirical evidence. *Soc Sci Med* 2014;105:112-21. doi:  
51  
52 10.1016/j.socscimed.2014.01.014 [published Online First:  
53  
54 2014/02/15]  
55  
56  
57  
58 3. Zhai T, Goss J, Li J. Main drivers of health expenditure growth in  
59  
60

- 1  
2  
3  
4 China: a decomposition analysis. *BMC Health Services Research*  
5  
6 2017;17(1):185. doi: 10.1186/s12913-017-2119-1  
7  
8  
9 4. Yip WN, Fu HQ, Chen AT, et al. 10 years of health-care reform in China:  
10  
11 progress and gaps in Universal Health Coverage. *Lancet*  
12  
13 2019;394(10204):1192-204. doi: Doi 10.1016/S0140-6736(19)32136-1  
14  
15  
16  
17 5. Roehrig CS, Rousseau DM. The Growth In Cost Per Case Explains Far  
18  
19 More Of US Health Spending Increases Than Rising Disease Prevalence.  
20  
21 *Health Affairs* 2011;30(9):1657-63.  
22  
23  
24  
25 6. Starr M, Dominiak L, Aizcorbe A. Decomposing Growth In Spending Finds  
26  
27 Annual Cost Of Treatment Contributed Most To Spending Growth,  
28  
29 1980-2006. *Health Affairs* 2014;33(5):823-31.  
30  
31  
32  
33 7. Dieleman JL, Squires E, Bui AL, et al. Factors Associated With  
34  
35 Increases in US Health Care Spending, 1996-2013. *Jama-J Am Med Assoc*  
36  
37 2017;318(17):1668-78. doi: 10.1001/jama.2017.15927  
38  
39  
40  
41 8. Stucki M. Factors related to the change in Swiss inpatient costs by  
42  
43 disease: a 6-factor decomposition. *The European journal of health*  
44  
45 *economics : HEPAC : health economics in prevention and care*  
46  
47 2021;22(2):195-221. doi: 10.1007/s10198-020-01243-3 [published  
48  
49 Online First: 2021/01/13]  
50  
51  
52  
53 9. Alves JD, Osorio-de-Castro CGS, Wettermark B, et al.  
54  
55 Immunosuppressants in Brazil: underlying drivers of spending trends,  
56  
57 2010-2015. *Expert Review of Pharmacoeconomics & Outcomes Research*  
58  
59  
60

- 1  
2  
3  
4 2018;18(5):565-72. doi: 10.1080/14737167.2018.1485098  
5  
6  
7 10. The National Health Commission. China Health Statistical  
8  
9 Yearbook-2019. Beijing,China: Peking Union Medical College Press  
10  
11 2019.  
12  
13  
14 11. Xu J, Jian W, Zhu K, et al. Reforming public hospital financing in  
15  
16 China: progress and challenges. *BMJ* 2019;365:14015. doi:  
17  
18 10.1136/bmj.14015 [published Online First: 2019/06/23]  
19  
20  
21  
22 12. Meng QY, Mills A, Wang LD, et al. What can we learn from China's  
23  
24 health system reform? *BMJ* 2019;365(12349) doi:  
25  
26 <https://doi.org/10.1136/bmj.12349>  
27  
28  
29  
30 13. Xinhua News Agency. Five departments of the State Council jointly  
31  
32 issued a document to control the unreasonable increase of medical  
33  
34 expenses in public hospitals 2015 [Available from:  
35  
36 [http://www.gov.cn/xinwen/2015-11/06/content\\_5005927.htm](http://www.gov.cn/xinwen/2015-11/06/content_5005927.htm) accessed  
37  
38 8 Dec. 2020.  
39  
40  
41  
42  
43 14. Fu HQ, Li L, Yip W. Intended and unintended impacts of price changes  
44  
45 for drugs and medical services: Evidence from China. *Social Science*  
46  
47 *& Medicine* 2018;211:114-22. doi: 10.1016/j.socscimed.2018.06.007  
48  
49  
50  
51 15. Wang Y, Zhang Y, Ma C, et al. Limited effects of the comprehensive  
52  
53 pricing healthcare reform in China. *Public Health* 2019;175:4-7. doi:  
54  
55 10.1016/j.puhe.2019.06.014  
56  
57  
58  
59 16. Xinhua News Agency. The state council institutional reform plan 2018  
60

- 1  
2  
3  
4 [Available from:  
5  
6 [http://www.gov.cn/xinwen/2018-03/17/content\\_5275116.htm](http://www.gov.cn/xinwen/2018-03/17/content_5275116.htm) accessed  
7  
8  
9 Jun 25 2021.  
10
- 11 17. National Bureau of Statistics. China Statistical Yearbook 2019.  
12  
13 Beijing, China: China Statistics Press 2019.  
14
- 15 18. International Monetary Fund. IMF Executive Board Concludes 2019  
16  
17 Article IV Consultation with the People's Republic of China. 2019.  
18  
19 [https://www.imf.org/en/News/Articles/2019/08/09/pr19314-china-i](https://www.imf.org/en/News/Articles/2019/08/09/pr19314-china-imf-executive-board-concludes-2019-article-iv-consultation)  
20  
21 [mf-executive-board-concludes-2019-article-iv-consultation](https://www.imf.org/en/News/Articles/2019/08/09/pr19314-china-imf-executive-board-concludes-2019-article-iv-consultation)  
22  
23  
24  
25  
26 (accessed 30 Sep 2019).  
27  
28
- 29 19. Das Gupta P. Decomposition of the difference between two rates and  
30  
31 its consistency when more than two populations are involved.  
32  
33 *Mathematical Population Studies:: An International Journal of*  
34  
35 *Mathematical Demography* 1991;3(2):105-25.  
36  
37  
38
- 39 20. Das Gupta P. Standardization and decomposition of rates: a users's  
40  
41 manual: US Department of Commerce, Economics and Statistics  
42  
43 Administration, Bureau of the Census 1993.  
44  
45  
46  
47
- 48 21. Liu X, Xu J, Yuan B, et al. Containing medical expenditure: lessons  
49  
50 from reform of Beijing public hospitals. *BMJ* 2019;365:12369. doi:  
51  
52 10.1136/bmj.12369 [published Online First: 2019/06/23]  
53  
54
- 55 22. Li BY, Man XW, Fang YY, et al. Analysis on the Cost Changes of Total  
56  
57 Health Expenditure of Medical Institutions In Beijing During the  
58  
59  
60

- 1  
2  
3  
4 12th 5-Year Plan Period. *Chinese Journal of Social Medicine*  
5  
6 2018;35(5):107-10.  
7  
8  
9 23. Deng J, Song XG, Xu CW, et al. Empirical Analysis and Optimization  
10  
11 Research of Medical Service Price Reform in Urban Public Hospitals  
12  
13 of Guangdong. *Chinese Health Economy* 2018;37(7):37-40.  
14  
15  
16 24. Yan XL, Rao KQ, Hu LL, et al. Discussions on the progress and problems  
17  
18 of public hospital payment system reforms in China. *Chin J Hosp Admin*  
19  
20 2015;31(2):84-86.  
21  
22  
23 25. Moses MW, Pedroza P, Baral R, et al. Funding and services needed  
24  
25 to achieve universal health coverage: applications of global,  
26  
27 regional, and national estimates of utilisation of outpatient visits  
28  
29 and inpatient admissions from 1990 to 2016, and unit costs from 1995  
30  
31 to 2016. *Lancet Public Health* 2019;4(1):E49-E73.  
32  
33  
34 26. Li YN, Nong DX, Wei B, et al. The impact of predisposing, enabling,  
35  
36 and need factors in utilization of health services among rural  
37  
38 residents in Guangxi, China. *Bmc Health Services Research* 2016;16:9.  
39  
40  
41  
42  
43  
44  
45  
46  
47  
48  
49  
50  
51  
52  
53  
54  
55  
56  
57  
58  
59  
60

- 1  
2  
3  
4 Peking Union Medical College Press 2009.  
5  
6  
7 29. Meng Q, Xu L, Zhang Y, et al. Trends in access to health services  
8  
9 and financial protection in China between 2003 and 2011: a  
10  
11 cross-sectional study. *Lancet* 2012;379(9818):805-14. doi:  
12  
13 10.1016/s0140-6736(12)60278-5  
14  
15  
16  
17 30. Su D, Chen Y, Gao H, et al. Effect of integrated urban and rural  
18  
19 residents medical insurance on the utilization of medical services  
20  
21 by residents in China: a propensity score matching with  
22  
23 difference-in-differences regression approach. *BMJ Open*  
24  
25 2019(9):E026408.  
26  
27  
28  
29  
30 31. Liu H, Zhao Z. Does health insurance matter? Evidence from China's  
31  
32 urban resident basic medical insurance. *Journal of Comparative*  
33  
34 *Economics* 2014;42(4):1007-20.  
35  
36  
37  
38 32. Zhang YG, Dong D, Xu L, et al. Equity in health care after 10 years  
39  
40 of the New Rural Co-operative Medical Insurance Scheme in China:  
41  
42 an analysis of national survey data. *Lancet* 2018;392:35-35.  
43  
44  
45  
46 33. Babiarz KS, Miller G, Yi HM, et al. China's New Cooperative Medical  
47  
48 Scheme Improved Finances Of Township Health Centers But Not The  
49  
50 Number Of Patients Served. *Health Affairs* 2012;31(5):1065-74. doi:  
51  
52 10.1377/hlthaff.2010.1311  
53  
54  
55  
56 34. Xu J, Wang J, King M, et al. Rural-urban disparities in the utilization  
57  
58 of mental health inpatient services in China: the role of health  
59  
60



- 1  
2  
3  
4 insurance. *Int J Health Econ Manag* 2018;18(4):377-93. doi:  
5  
6 10.1007/s10754-018-9238-z [published Online First: 2018/03/29]  
7  
8  
9 35. Zhang H, Hu HM, Wu C, et al. Impact of China's Public Hospital Reform  
10  
11 on Healthcare Expenditures and Utilization: A Case Study in ZJ  
12  
13 Province. *Plos One* 2015;10(11) doi: 10.1371/journal.pone.0143130  
14  
15  
16  
17 36. Zhai TM, Goss J, Dmytraczenko T, et al. China's Health Expenditure  
18  
19 Projections To 2035: Future Trajectory And The Estimated Impact Of  
20  
21 Reforms. *HEALTH AFFAIRS* 2019;38(5):835-43. doi:  
22  
23 10.1377/hlthaff.2018.05324  
24  
25  
26  
27 37. Meng Y, Yan X, li X, et al. Principal concept and practices and  
28  
29 enlightenment of managing health demand in developed countries.  
30  
31 *Chinese Journal of Health Management* 2016;10(3):241-45.  
32  
33  
34  
35 38. Stadhouders N, Kruse F, Tanke M, et al. Effective healthcare  
36  
37 cost-containment policies: A systematic review. *Health Policy*  
38  
39 2019;123(1):71-79. doi:  
40  
41 <https://doi.org/10.1016/j.healthpol.2018.10.015>  
42  
43  
44  
45  
46

### Figure legends

47  
48  
49 Figure 1 Contributions of growth in service volume and price and intensity  
50  
51 to growth in the real total medical expenditure of public hospitals,  
52  
53 2008-2018  
54  
55  
56  
57  
58  
59

60 Figure 2 Growth in the real total medical expenditure of public hospitals

1  
2  
3  
4 associated with changes in each factor in the 4-factor decomposition  
5  
6 by type of care, 2008-2018  
7  
8  
9  
10  
11  
12  
13  
14  
15  
16  
17  
18  
19  
20  
21  
22  
23  
24  
25  
26  
27  
28  
29  
30  
31  
32  
33  
34  
35  
36  
37  
38  
39  
40  
41  
42  
43  
44  
45  
46  
47  
48  
49  
50  
51  
52  
53  
54  
55  
56  
57  
58  
59  
60

For peer review only

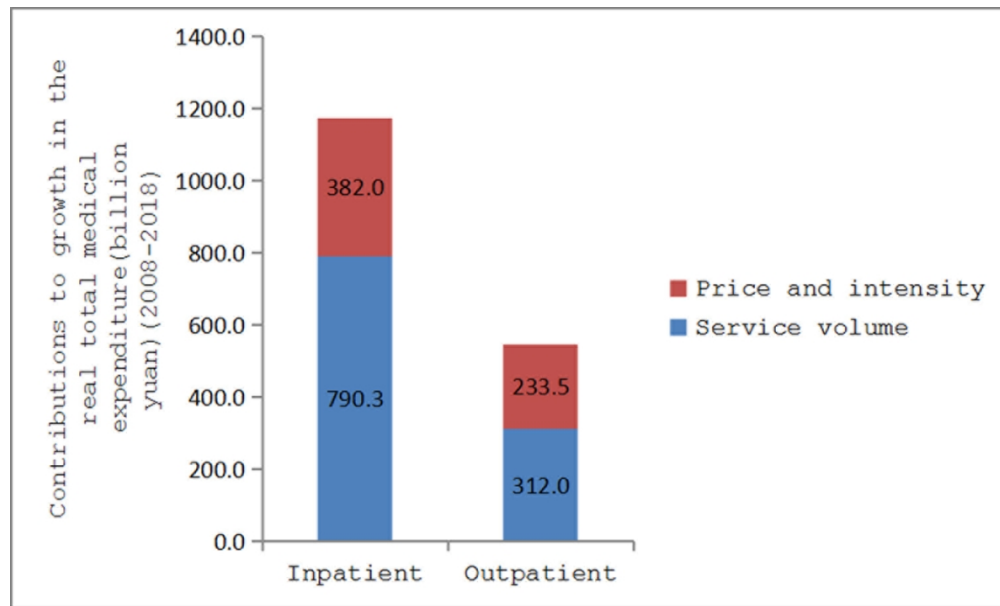

Figure 1 Contributions of growth in service volume and price and intensity to growth in the real total medical expenditure of public hospitals, 2008-2018

397x311mm (96 x 96 DPI)

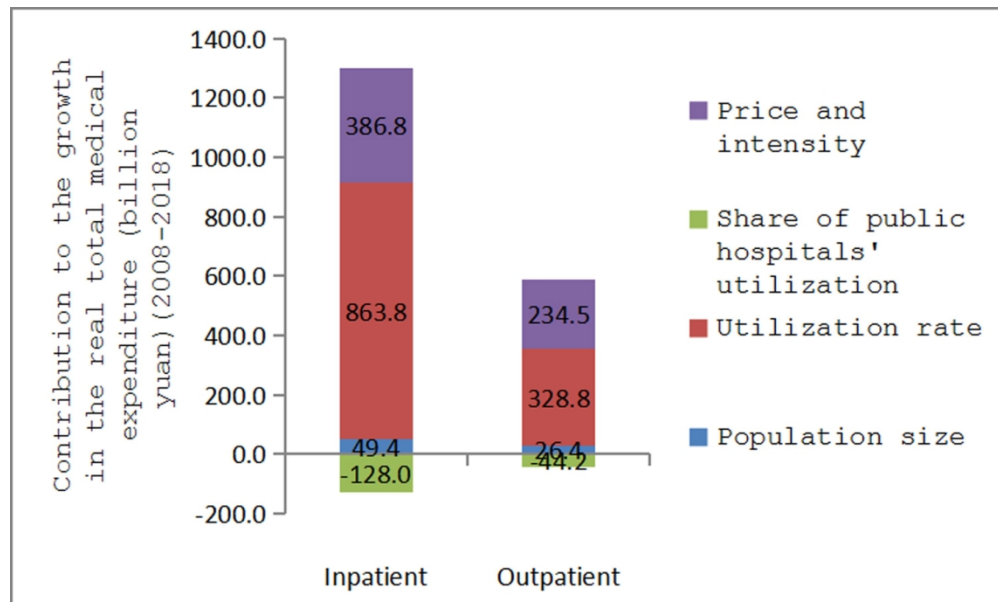

Figure 2 Growth in the real total medical expenditure of public hospitals associated with changes in each factor in the 4-factor decomposition by type of care, 2008–2018

Growth in the real total medical expenditure of public hospitals from 2008 to 2018 were decomposed into changes in four factors: population size, utilization rate, share of public hospitals' utilization, and price and intensity. Colours represent the contribution of each factor to the overall growth in real total medical expenditure. Bars below zero show that the factor contributed to a decrease and bars above zero show an increase.

397x429mm (96 x 96 DPI)

## Appendix exhibit 1.

### Decomposition-standardization methods

#### 1.1 The case of two factors

To measure the relative effect of each of the two factors, we used the decomposition method described by Das Gupta<sup>1,2</sup>. This decomposition was based on the calculation of the standardized rates of each factor, and then, we calculated the additive contributions of each factor to the changes in hospital outpatient or inpatient total expenditure in different years from 2008 to 2018 using the following equations:

$$\text{Price and intensity standardized medical expenditure: } y_0: \frac{P_{y1}+P_{y0}}{2} V_{y0}$$

$$\text{Price and intensity standardized medical expenditure: } y_1: \frac{P_{y1}+P_{y0}}{2} V_{y1}.$$

The difference between the  $y_0$  price and intensity standardized medical expenditure and the  $y_1$  price and intensity standardized medical expenditure is the effect of the difference in the service volume, or the contribution of the difference in the service volume to the difference in the medical expenditure between  $y_0$  and  $y_1$  based on the following equation:

$$V_a = \frac{P_{y1}+P_{y0}}{2} (V_{y1} - V_{y0}).$$

Similarly, the difference between the  $y_0$  service volume standardized medical expenditure and the  $y_1$  service volume standardized medical expenditure is the effect of the difference in the price and intensity, or the contribution of the difference in the price and intensity to the difference in the medical expenditure between  $y_0$  and  $y_1$  based on the following equation:

$$P_a = \frac{V_{y1}+V_{y0}}{2} (P_{y1} - P_{y0}).$$

Then, we obtain the following identity:

$$\Delta TME = TME_{y_1} - TME_{y_0} = V_a + P_a.$$

The relative contributions of the two factors can be expressed as follows:

$$V_r = V_a / \Delta TME * 100\%,$$

$$P_r = P_a / \Delta TME * 100\%,$$

where  $\Delta TME$  is the change in the total medical expenditures between  $y_1$  and  $y_0$  (e.g., 2008 and 2018).  $V_a$  is the difference in the total medical expenditures associated with the difference in the service volume in counterfactual scenarios if the price and intensities were identical in the two years;  $P_a$  is the difference in the total medical expenditures associated with the difference in the service price and intensity in counterfactual scenarios if the service volumes were identical in the two years;  $V_r$  is the relative contribution rate of the difference in the total medical expenditure attributed to the in the service volume by expressed as a percentage; and  $P_r$  is the relative contribution rate of the difference in the total medical expenditure attributed to the difference in the service price and intensity by expressed as a percentage.

## 1.2 The case of four factors

The following four factors were constructed: (1) the total Chinese population, (2) the utilization rate (hospital visits per capita), (3) the share of public hospital service utilization, (4) the service price and intensity; then, the total medical expenditure of public hospitals can be written as follows:

$$TME_y = Pop_y \times \frac{V_{th,y}}{Pop_y} \times \frac{V_{ph,y}}{V_{th,y}} \times P_y,$$

where  $y$  indicates the year;  $TME_y$  is the total medical expenditure of public hospitals;  $Pop_y$  is the population size;  $V_{th,y}$  is the service volume of all hospitals (including public and private hospitals);  $V_{ph,y}$  is the service volume of public hospitals; and  $P_y$  is the service price and intensity of public hospital care.

To make it easier to write the above equation, the total medical expenditure can be written as follows:

$$TME_y = \alpha \beta \gamma \delta.$$

Then, we can express the total medical expenditure in  $y_0$  and  $y_1$  as follows:

$$TME_{y_0} = ABCD, \quad TME_{y_1} = abcd$$

From the decomposition method described by Das Gupta<sup>1,2</sup>, we obtain  $\beta \gamma \delta$ -standardized expenditure as follows:

$$\text{in } y_0 = Q(A),$$

$$\text{in } y_1 = Q(a),$$

such that

$$\alpha\_effect = Q(a-A),$$

where  $Q$  is a function of  $b, c, d, B, C, D$  given by the following:

$$Q = Q(b, c, d, B, C, D) = \frac{bcd + BCD}{4} + \frac{bcd + bCd + Bcd + BCD + Bcd + bcd}{12}.$$

Other standardized total medical expenditure and factor effects can be easily derived by interchanging the letters in the above equations. For example, the  $\alpha \gamma \delta$  standardized total medical expenditure and effect are obtained by substituting  $b, a, B, A$  for  $a, b, A, B$ , respectively.

Then, we obtain the following identity:

$$\Delta TME = TME_{y_1} - TME_{y_0} = \alpha\_effect + \beta\_effect + \gamma\_effect + \delta\_effect$$

**Note**

1. Das Gupta P. Decomposition of the difference between two rates and its consistency when more than two populations are involved. *Mathematical Population Studies: An International Journal of Mathematical Demography* 1991;3(2):105-25.
2. Das Gupta P. Standardization and decomposition of rates: a users's manual: US Department of Commerce, Economics and Statistics Administration, Bureau of the Census 1993.

For peer review only



**The RECORD statement – checklist of items, extended from the STROBE statement, that should be reported in observational studies using routinely collected health data.**

|                           | Item No. | STROBE items                                                                                                                                                                               | Location in manuscript where items are reported | RECORD items                                                                                                                                                                                                                                                                                                                                                                                                                                | Location in manuscript where items are reported                                        |
|---------------------------|----------|--------------------------------------------------------------------------------------------------------------------------------------------------------------------------------------------|-------------------------------------------------|---------------------------------------------------------------------------------------------------------------------------------------------------------------------------------------------------------------------------------------------------------------------------------------------------------------------------------------------------------------------------------------------------------------------------------------------|----------------------------------------------------------------------------------------|
| <b>Title and abstract</b> |          |                                                                                                                                                                                            |                                                 |                                                                                                                                                                                                                                                                                                                                                                                                                                             |                                                                                        |
|                           | 1        | (a) Indicate the study's design with a commonly used term in the title or the abstract (b) Provide in the abstract an informative and balanced summary of what was done and what was found |                                                 | RECORD 1.1: The type of data used should be specified in the title or abstract. When possible, the name of the databases used should be included.<br><br>RECORD 1.2: If applicable, the geographic region and timeframe within which the study took place should be reported in the title or abstract.<br><br>RECORD 1.3: If linkage between databases was conducted for the study, this should be clearly stated in the title or abstract. | RECORD 1.1, 1.2 and 1.3 were reported in the Design section of the abstract in page 2. |
| <b>Introduction</b>       |          |                                                                                                                                                                                            |                                                 |                                                                                                                                                                                                                                                                                                                                                                                                                                             |                                                                                        |
| Background rationale      | 2        | Explain the scientific background and rationale for the investigation being reported                                                                                                       |                                                 |                                                                                                                                                                                                                                                                                                                                                                                                                                             | Page 4, 5 and 6.                                                                       |
| Objectives                | 3        | State specific objectives, including any prespecified hypotheses                                                                                                                           |                                                 |                                                                                                                                                                                                                                                                                                                                                                                                                                             | Page 6 and 7.                                                                          |
| <b>Methods</b>            |          |                                                                                                                                                                                            |                                                 |                                                                                                                                                                                                                                                                                                                                                                                                                                             |                                                                                        |
| Study Design              | 4        | Present key elements of study design early in the paper                                                                                                                                    |                                                 |                                                                                                                                                                                                                                                                                                                                                                                                                                             | Page 10, 11 and 12.                                                                    |
| Setting                   | 5        | Describe the setting, locations, and relevant dates, including periods of recruitment, exposure, follow-up, and data collection                                                            |                                                 |                                                                                                                                                                                                                                                                                                                                                                                                                                             | Page 7 and 8.                                                                          |
| Participants              | 6        | (a) <i>Cohort study</i> - Give the eligibility criteria, and the                                                                                                                           |                                                 | RECORD 6.1: The methods of study population selection (such as codes or                                                                                                                                                                                                                                                                                                                                                                     | Not applicable.                                                                        |

|                                                                                                                                           |                              |                                                                                                                                                                                                                                                                                                                                                                                                                                                                                                                                                                                                                                          |                                                                                                                                                                                      |                                                                                                                                                                                                                                                                                                                                                                                                                                                                                                                                                                                                                       |                      |
|-------------------------------------------------------------------------------------------------------------------------------------------|------------------------------|------------------------------------------------------------------------------------------------------------------------------------------------------------------------------------------------------------------------------------------------------------------------------------------------------------------------------------------------------------------------------------------------------------------------------------------------------------------------------------------------------------------------------------------------------------------------------------------------------------------------------------------|--------------------------------------------------------------------------------------------------------------------------------------------------------------------------------------|-----------------------------------------------------------------------------------------------------------------------------------------------------------------------------------------------------------------------------------------------------------------------------------------------------------------------------------------------------------------------------------------------------------------------------------------------------------------------------------------------------------------------------------------------------------------------------------------------------------------------|----------------------|
| 1<br>2<br>3<br>4<br>5<br>6<br>7<br>8<br>9<br>10<br>11<br>12<br>13<br>14<br>15<br>16<br>17<br>18<br>19<br>20<br>21<br>22<br>23<br>24<br>25 |                              | sources and methods of selection of participants. Describe methods of follow-up<br><i>Case-control study</i> - Give the eligibility criteria, and the sources and methods of case ascertainment and control selection. Give the rationale for the choice of cases and controls<br><i>Cross-sectional study</i> - Give the eligibility criteria, and the sources and methods of selection of participants<br><br><i>(b) Cohort study</i> - For matched studies, give matching criteria and number of exposed and unexposed<br><i>Case-control study</i> - For matched studies, give matching criteria and the number of controls per case |                                                                                                                                                                                      | algorithms used to identify subjects) should be listed in detail. If this is not possible, an explanation should be provided.<br><br>RECORD 6.2: Any validation studies of the codes or algorithms used to select the population should be referenced. If validation was conducted for this study and not published elsewhere, detailed methods and results should be provided.<br><br>RECORD 6.3: If the study involved linkage of databases, consider use of a flow diagram or other graphical display to demonstrate the data linkage process, including the number of individuals with linked data at each stage. |                      |
| 26<br>27<br>28<br>29<br>30<br>31<br>32                                                                                                    | Variables                    | 7                                                                                                                                                                                                                                                                                                                                                                                                                                                                                                                                                                                                                                        | Clearly define all outcomes, exposures, predictors, potential confounders, and effect modifiers. Give diagnostic criteria, if applicable.                                            | RECORD 7.1: A complete list of codes and algorithms used to classify exposures, outcomes, confounders, and effect modifiers should be provided. If these cannot be reported, an explanation should be provided.                                                                                                                                                                                                                                                                                                                                                                                                       | Page 8 and 9 and 10. |
| 33<br>34<br>35<br>36<br>37<br>38<br>39<br>40                                                                                              | Data sources/<br>measurement | 8                                                                                                                                                                                                                                                                                                                                                                                                                                                                                                                                                                                                                                        | For each variable of interest, give sources of data and details of methods of assessment (measurement). Describe comparability of assessment methods if there is more than one group |                                                                                                                                                                                                                                                                                                                                                                                                                                                                                                                                                                                                                       | Page 7 and 8.        |
| 41<br>42                                                                                                                                  | Bias                         | 9                                                                                                                                                                                                                                                                                                                                                                                                                                                                                                                                                                                                                                        | Describe any efforts to address potential sources of bias                                                                                                                            |                                                                                                                                                                                                                                                                                                                                                                                                                                                                                                                                                                                                                       | Not applicable.      |
| 43<br>44<br>45<br>46<br>47                                                                                                                | Study size                   | 10                                                                                                                                                                                                                                                                                                                                                                                                                                                                                                                                                                                                                                       | Explain how the study size was                                                                                                                                                       |                                                                                                                                                                                                                                                                                                                                                                                                                                                                                                                                                                                                                       | Not applicable.      |

|                                                                                                                                           |                                  |            |                                                                                                                                                                                                                                                                                                                                                                                                                                                                                                                                                                      |                                                                                                                                                                                                                                                              |
|-------------------------------------------------------------------------------------------------------------------------------------------|----------------------------------|------------|----------------------------------------------------------------------------------------------------------------------------------------------------------------------------------------------------------------------------------------------------------------------------------------------------------------------------------------------------------------------------------------------------------------------------------------------------------------------------------------------------------------------------------------------------------------------|--------------------------------------------------------------------------------------------------------------------------------------------------------------------------------------------------------------------------------------------------------------|
|                                                                                                                                           |                                  | arrived at |                                                                                                                                                                                                                                                                                                                                                                                                                                                                                                                                                                      |                                                                                                                                                                                                                                                              |
| 1<br>2<br>3<br>4<br>5<br>6                                                                                                                | Quantitative variables           | 11         | Explain how quantitative variables were handled in the analyses. If applicable, describe which groupings were chosen, and why                                                                                                                                                                                                                                                                                                                                                                                                                                        | Page 8, 9 and 10.                                                                                                                                                                                                                                            |
| 7<br>8<br>9<br>10<br>11<br>12<br>13<br>14<br>15<br>16<br>17<br>18<br>19<br>20<br>21<br>22<br>23<br>24<br>25<br>26<br>27<br>28<br>29<br>30 | Statistical methods              | 12         | (a) Describe all statistical methods, including those used to control for confounding<br>(b) Describe any methods used to examine subgroups and interactions<br>(c) Explain how missing data were addressed<br>(d) <i>Cohort study</i> - If applicable, explain how loss to follow-up was addressed<br><i>Case-control study</i> - If applicable, explain how matching of cases and controls was addressed<br><i>Cross-sectional study</i> - If applicable, describe analytical methods taking account of sampling strategy<br>(e) Describe any sensitivity analyses | Page 10, 11 and 12.                                                                                                                                                                                                                                          |
| 31<br>32<br>33<br>34<br>35<br>36<br>37<br>38<br>39<br>40<br>41                                                                            | Data access and cleaning methods |            | ..                                                                                                                                                                                                                                                                                                                                                                                                                                                                                                                                                                   | RECORD 12.1: Authors should describe the extent to which the investigators had access to the database population used to create the study population.<br><br>RECORD 12.2: Authors should provide information on the data cleaning methods used in the study. |
| 42<br>43<br>44                                                                                                                            | Linkage                          |            | ..                                                                                                                                                                                                                                                                                                                                                                                                                                                                                                                                                                   | RECORD 12.3: State whether the study included person-level, institutional-                                                                                                                                                                                   |

|                  |    |                                                                                                                                                                                                                                                                                                                                                 |  |                                                                                                                                                                                                                                                                                                                    |                 |
|------------------|----|-------------------------------------------------------------------------------------------------------------------------------------------------------------------------------------------------------------------------------------------------------------------------------------------------------------------------------------------------|--|--------------------------------------------------------------------------------------------------------------------------------------------------------------------------------------------------------------------------------------------------------------------------------------------------------------------|-----------------|
|                  |    |                                                                                                                                                                                                                                                                                                                                                 |  | level, or other data linkage across two or more databases. The methods of linkage and methods of linkage quality evaluation should be provided.                                                                                                                                                                    |                 |
| <b>Results</b>   |    |                                                                                                                                                                                                                                                                                                                                                 |  |                                                                                                                                                                                                                                                                                                                    |                 |
| Participants     | 13 | (a) Report the numbers of individuals at each stage of the study ( <i>e.g.</i> , numbers potentially eligible, examined for eligibility, confirmed eligible, included in the study, completing follow-up, and analysed)<br>(b) Give reasons for non-participation at each stage.<br>(c) Consider use of a flow diagram                          |  | RECORD 13.1: Describe in detail the selection of the persons included in the study ( <i>i.e.</i> , study population selection) including filtering based on data quality, data availability and linkage. The selection of included persons can be described in the text and/or by means of the study flow diagram. | Not applicable. |
| Descriptive data | 14 | (a) Give characteristics of study participants ( <i>e.g.</i> , demographic, clinical, social) and information on exposures and potential confounders<br>(b) Indicate the number of participants with missing data for each variable of interest<br>(c) <i>Cohort study</i> - summarise follow-up time ( <i>e.g.</i> , average and total amount) |  |                                                                                                                                                                                                                                                                                                                    | Page 12 and 13. |
| Outcome data     | 15 | <i>Cohort study</i> - Report numbers of outcome events or summary measures over time<br><i>Case-control study</i> - Report numbers in each exposure category, or summary measures of exposure<br><i>Cross-sectional study</i> - Report numbers of outcome events or summary measures                                                            |  |                                                                                                                                                                                                                                                                                                                    | Page 13         |
| Main results     | 16 | (a) Give unadjusted estimates                                                                                                                                                                                                                                                                                                                   |  |                                                                                                                                                                                                                                                                                                                    | Page 13 and 14  |

|    |                   |                                                                                                                                                                                  |                                                                                                                                                                            |                                                                                                                                                                                                                                                                                                          |                         |
|----|-------------------|----------------------------------------------------------------------------------------------------------------------------------------------------------------------------------|----------------------------------------------------------------------------------------------------------------------------------------------------------------------------|----------------------------------------------------------------------------------------------------------------------------------------------------------------------------------------------------------------------------------------------------------------------------------------------------------|-------------------------|
| 1  |                   | and, if applicable, confounder-adjusted estimates and their precision (e.g., 95% confidence interval). Make clear which confounders were adjusted for and why they were included |                                                                                                                                                                            |                                                                                                                                                                                                                                                                                                          |                         |
| 2  |                   | (b) Report category boundaries when continuous variables were categorized                                                                                                        |                                                                                                                                                                            |                                                                                                                                                                                                                                                                                                          |                         |
| 3  |                   | (c) If relevant, consider translating estimates of relative risk into absolute risk for a meaningful time period                                                                 |                                                                                                                                                                            |                                                                                                                                                                                                                                                                                                          |                         |
| 4  |                   |                                                                                                                                                                                  |                                                                                                                                                                            |                                                                                                                                                                                                                                                                                                          |                         |
| 5  |                   |                                                                                                                                                                                  |                                                                                                                                                                            |                                                                                                                                                                                                                                                                                                          |                         |
| 6  |                   |                                                                                                                                                                                  |                                                                                                                                                                            |                                                                                                                                                                                                                                                                                                          |                         |
| 7  |                   |                                                                                                                                                                                  |                                                                                                                                                                            |                                                                                                                                                                                                                                                                                                          |                         |
| 8  |                   |                                                                                                                                                                                  |                                                                                                                                                                            |                                                                                                                                                                                                                                                                                                          |                         |
| 9  |                   |                                                                                                                                                                                  |                                                                                                                                                                            |                                                                                                                                                                                                                                                                                                          |                         |
| 10 |                   |                                                                                                                                                                                  |                                                                                                                                                                            |                                                                                                                                                                                                                                                                                                          |                         |
| 11 |                   |                                                                                                                                                                                  |                                                                                                                                                                            |                                                                                                                                                                                                                                                                                                          |                         |
| 12 |                   |                                                                                                                                                                                  |                                                                                                                                                                            |                                                                                                                                                                                                                                                                                                          |                         |
| 13 |                   |                                                                                                                                                                                  |                                                                                                                                                                            |                                                                                                                                                                                                                                                                                                          |                         |
| 14 |                   |                                                                                                                                                                                  |                                                                                                                                                                            |                                                                                                                                                                                                                                                                                                          |                         |
| 15 | Other analyses    | 17                                                                                                                                                                               | Report other analyses done—e.g., analyses of subgroups and interactions, and sensitivity analyses                                                                          |                                                                                                                                                                                                                                                                                                          | Page 15, 16,17, and 18. |
| 16 |                   |                                                                                                                                                                                  |                                                                                                                                                                            |                                                                                                                                                                                                                                                                                                          |                         |
| 17 |                   |                                                                                                                                                                                  |                                                                                                                                                                            |                                                                                                                                                                                                                                                                                                          |                         |
| 18 |                   |                                                                                                                                                                                  |                                                                                                                                                                            |                                                                                                                                                                                                                                                                                                          |                         |
| 19 |                   |                                                                                                                                                                                  |                                                                                                                                                                            |                                                                                                                                                                                                                                                                                                          |                         |
| 20 | <b>Discussion</b> |                                                                                                                                                                                  |                                                                                                                                                                            |                                                                                                                                                                                                                                                                                                          |                         |
| 21 | Key results       | 18                                                                                                                                                                               | Summarise key results with reference to study objectives                                                                                                                   |                                                                                                                                                                                                                                                                                                          | Page 19                 |
| 22 |                   |                                                                                                                                                                                  |                                                                                                                                                                            |                                                                                                                                                                                                                                                                                                          |                         |
| 23 | Limitations       | 19                                                                                                                                                                               | Discuss limitations of the study, taking into account sources of potential bias or imprecision. Discuss both direction and magnitude of any potential bias                 | RECORD 19.1: Discuss the implications of using data that were not created or collected to answer the specific research question(s). Include discussion of misclassification bias, unmeasured confounding, missing data, and changing eligibility over time, as they pertain to the study being reported. | Page 22                 |
| 24 |                   |                                                                                                                                                                                  |                                                                                                                                                                            |                                                                                                                                                                                                                                                                                                          |                         |
| 25 |                   |                                                                                                                                                                                  |                                                                                                                                                                            |                                                                                                                                                                                                                                                                                                          |                         |
| 26 |                   |                                                                                                                                                                                  |                                                                                                                                                                            |                                                                                                                                                                                                                                                                                                          |                         |
| 27 |                   |                                                                                                                                                                                  |                                                                                                                                                                            |                                                                                                                                                                                                                                                                                                          |                         |
| 28 |                   |                                                                                                                                                                                  |                                                                                                                                                                            |                                                                                                                                                                                                                                                                                                          |                         |
| 29 |                   |                                                                                                                                                                                  |                                                                                                                                                                            |                                                                                                                                                                                                                                                                                                          |                         |
| 30 |                   |                                                                                                                                                                                  |                                                                                                                                                                            |                                                                                                                                                                                                                                                                                                          |                         |
| 31 |                   |                                                                                                                                                                                  |                                                                                                                                                                            |                                                                                                                                                                                                                                                                                                          |                         |
| 32 |                   |                                                                                                                                                                                  |                                                                                                                                                                            |                                                                                                                                                                                                                                                                                                          |                         |
| 33 | Interpretation    | 20                                                                                                                                                                               | Give a cautious overall interpretation of results considering objectives, limitations, multiplicity of analyses, results from similar studies, and other relevant evidence |                                                                                                                                                                                                                                                                                                          | Page 19, 20 and 21.     |
| 34 |                   |                                                                                                                                                                                  |                                                                                                                                                                            |                                                                                                                                                                                                                                                                                                          |                         |
| 35 |                   |                                                                                                                                                                                  |                                                                                                                                                                            |                                                                                                                                                                                                                                                                                                          |                         |
| 36 |                   |                                                                                                                                                                                  |                                                                                                                                                                            |                                                                                                                                                                                                                                                                                                          |                         |
| 37 |                   |                                                                                                                                                                                  |                                                                                                                                                                            |                                                                                                                                                                                                                                                                                                          |                         |
| 38 |                   |                                                                                                                                                                                  |                                                                                                                                                                            |                                                                                                                                                                                                                                                                                                          |                         |
| 39 |                   |                                                                                                                                                                                  |                                                                                                                                                                            |                                                                                                                                                                                                                                                                                                          |                         |
| 40 |                   |                                                                                                                                                                                  |                                                                                                                                                                            |                                                                                                                                                                                                                                                                                                          |                         |
| 41 | Generalisability  | 21                                                                                                                                                                               | Discuss the generalisability (external validity) of the study results                                                                                                      |                                                                                                                                                                                                                                                                                                          | Page 21 and 22.         |
| 42 |                   |                                                                                                                                                                                  |                                                                                                                                                                            |                                                                                                                                                                                                                                                                                                          |                         |
| 43 |                   |                                                                                                                                                                                  |                                                                                                                                                                            |                                                                                                                                                                                                                                                                                                          |                         |
| 44 |                   |                                                                                                                                                                                  |                                                                                                                                                                            |                                                                                                                                                                                                                                                                                                          |                         |

| Other Information                                         |    |                                                                                                                                                               |  |                                                                                                                                                          |         |
|-----------------------------------------------------------|----|---------------------------------------------------------------------------------------------------------------------------------------------------------------|--|----------------------------------------------------------------------------------------------------------------------------------------------------------|---------|
| Funding                                                   | 22 | Give the source of funding and the role of the funders for the present study and, if applicable, for the original study on which the present article is based |  |                                                                                                                                                          | Page 23 |
| Accessibility of protocol, raw data, and programming code |    | ..                                                                                                                                                            |  | RECORD 22.1: Authors should provide information on how to access any supplemental information such as the study protocol, raw data, or programming code. | Page 23 |

\*Reference: Benchimol EI, Smeeth L, Guttman A, Harron K, Moher D, Petersen I, Sørensen HT, von Elm E, Langan SM, the RECORD Working Committee. The REporting of studies Conducted using Observational Routinely-collected health Data (RECORD) Statement. *PLoS Medicine* 2015; in press.

\*Checklist is protected under Creative Commons Attribution ([CC BY](https://creativecommons.org/licenses/by/4.0/)) license.

# BMJ Open

## What is the major driver of China's hospital medical expenditure growth? A decomposing analysis

|                                 |                                                                                                                                                                                                                                                                                                                                                                                                                                                                                                                                                |
|---------------------------------|------------------------------------------------------------------------------------------------------------------------------------------------------------------------------------------------------------------------------------------------------------------------------------------------------------------------------------------------------------------------------------------------------------------------------------------------------------------------------------------------------------------------------------------------|
| Journal:                        | <i>BMJ Open</i>                                                                                                                                                                                                                                                                                                                                                                                                                                                                                                                                |
| Manuscript ID                   | bmjopen-2020-048308.R2                                                                                                                                                                                                                                                                                                                                                                                                                                                                                                                         |
| Article Type:                   | Original research                                                                                                                                                                                                                                                                                                                                                                                                                                                                                                                              |
| Date Submitted by the Author:   | 13-Dec-2021                                                                                                                                                                                                                                                                                                                                                                                                                                                                                                                                    |
| Complete List of Authors:       | Yan, Xiaoling; Chinese Academy of Medical Sciences & Peking Union Medical College, School of Health Policy and Management; Chinese Academy of Medical Sciences & Peking Union Medical College Institute of Medical Information<br>Liu, Yuanli; Chinese Academy of Medical Sciences & Peking Union Medical College, School of Health Policy and Management<br>Rao, Keqin; China Health Economics Association<br>Li, Jinlei; Chinese Academy of Medical Sciences & Peking Union Medical College, School of Population Medicine and Public Health |
| <b>Primary Subject Heading</b>: | Health economics                                                                                                                                                                                                                                                                                                                                                                                                                                                                                                                               |
| Secondary Subject Heading:      | Health policy, Health services research                                                                                                                                                                                                                                                                                                                                                                                                                                                                                                        |
| Keywords:                       | HEALTH ECONOMICS, Health policy < HEALTH SERVICES ADMINISTRATION & MANAGEMENT, Health economics < HEALTH SERVICES ADMINISTRATION & MANAGEMENT                                                                                                                                                                                                                                                                                                                                                                                                  |
|                                 |                                                                                                                                                                                                                                                                                                                                                                                                                                                                                                                                                |

SCHOLARONE™  
Manuscripts



I, the Submitting Author has the right to grant and does grant on behalf of all authors of the Work (as defined in the below author licence), an exclusive licence and/or a non-exclusive licence for contributions from authors who are: i) UK Crown employees; ii) where BMJ has agreed a CC-BY licence shall apply, and/or iii) in accordance with the terms applicable for US Federal Government officers or employees acting as part of their official duties; on a worldwide, perpetual, irrevocable, royalty-free basis to BMJ Publishing Group Ltd ("BMJ") its licensees and where the relevant Journal is co-owned by BMJ to the co-owners of the Journal, to publish the Work in this journal and any other BMJ products and to exploit all rights, as set out in our [licence](#).

The Submitting Author accepts and understands that any supply made under these terms is made by BMJ to the Submitting Author unless you are acting as an employee on behalf of your employer or a postgraduate student of an affiliated institution which is paying any applicable article publishing charge ("APC") for Open Access articles. Where the Submitting Author wishes to make the Work available on an Open Access basis (and intends to pay the relevant APC), the terms of reuse of such Open Access shall be governed by a Creative Commons licence – details of these licences and which [Creative Commons](#) licence will apply to this Work are set out in our licence referred to above.

Other than as permitted in any relevant BMJ Author's Self Archiving Policies, I confirm this Work has not been accepted for publication elsewhere, is not being considered for publication elsewhere and does not duplicate material already published. I confirm all authors consent to publication of this Work and authorise the granting of this licence.



# What is the major driver of China's hospital medical expenditure growth?

## A decomposing analysis

Xiaoling Yan<sup>1,2</sup>, Yuanli Liu<sup>1\*</sup>, Keqin Rao<sup>3</sup> and Jinlei Li<sup>4</sup>

<sup>1</sup> School of Health Policy and Management, Chinese Academy of Medical Sciences and Peking Union Medical College, 5 Dongdansantiao, Dongcheng District, Beijing 100730, China; [yanxiaoling08@163.com](mailto:yanxiaoling08@163.com) (X.Y.)

<sup>2</sup> Institute of Medical Information, Chinese Academy of Medical Sciences and Peking Union Medical College, 3 yabao Street, Chaoyang District, Beijing 100020, China

<sup>3</sup> China Health Economics Association, 38 Xueyuan Street, Haidian District, Beijing 100191, China; [uab12345@qq.com](mailto:uab12345@qq.com) (K.R.)

<sup>4</sup> School of Population Medicine and Public Health, Chinese Academy of Medical Sciences and Peking Union Medical College, 5 Dongdansantiao, Dongcheng District, Beijing 100730, China; [lijinlei921@126.com](mailto:lijinlei921@126.com) (J.L.)

\* Correspondence: Yuanli Liu; Postal address: 5 Dongdansantiao, Dongcheng District, Beijing 100730, China; E-mail: [liuyuanli\\_pumc@163.com](mailto:liuyuanli_pumc@163.com); Tel.: +86-1352-2592-907; Fax: +86-010-65105930.

Word count: 3536

**ABSTRACT**

**Objectives:** This study aimed to quantify increases in the medical expenditures of public hospitals associated with changes in service use and prices, which could inform policy efforts to curb the future growth of hospital medical expenditures.

**Design:** Nationwide and provincial data regarding service volume, service price and intensity of public hospitals' outpatient and inpatient care from 2008 to 2018 were extracted from the China Health Statistical Yearbooks, and population size data were obtained from the 2019 China Statistical Yearbook.

**Methods:** A decomposition analysis was performed to measure the relative effects of changes in service use (volume or its subcomponent factors) and service price and intensity on the increase in the inpatient and outpatient total medical expenditures of public hospitals from 2008 to 2018.

**Results:** After adjusting for price inflation, the total medical expenditure of public hospitals increased by approximately 3-fold from 2008 to 2018. During this period, the increase in service volume was associated with 67.4% of the observed increase in the total medical expenditures in the inpatient sector and 57.2% of the observed increase in the total medical expenditures in the outpatient sector. Most of the service volume effect is due to an increase in the hospital utilization

1  
2  
3  
4 rate. The growth in the utilization rate was associated with 73.7% of  
5  
6 the observed growth in the total medical expenditures in the inpatient  
7  
8 sector and 60.3% of the observed growth in the total medical expenditures  
9  
10 in the outpatient sector.  
11  
12

13  
14 **Conclusion:** Service use, rather than price, appears to be the major driver  
15  
16 of increases in medical expenditures in Chinese hospitals. An important  
17  
18 policy implication for China and other countries with similar drivers  
19  
20 is that the effect of controlling price and intensity growth on containing  
21  
22 medical costs could be limited and controlling service utilization growth  
23  
24 could be essential.  
25  
26  
27  
28  
29  
30

### 31 **Strengths and limitations of this study**

- 32  
33  
34 ● This study extends the existing literature by focusing on the drivers  
35  
36 of growth in public hospitals' medical expenditure during the first  
37  
38 decade of the new round of health system reform in China.  
39  
40
- 41  
42 ● This study decomposed growth in medical expenditure into changes in  
43  
44 its primary policy-relevant constituent factors, i.e., service  
45  
46 volume and price, and subcomponent factors of service volume.  
47  
48
- 49  
50 ● This study provides region-specific decomposition rates of the  
51  
52 sources of the growth in public hospitals' medical expenditure in  
53  
54 31 provinces, autonomous regions and municipalities in mainland  
55  
56 China.  
57  
58
- 59  
60 ● Due to the lack of a price index specific to the health sector in

1  
2  
3  
4 China, this study cannot distinguish between the contributions of  
5  
6 the service price and service intensity.  
7

- 8  
9 ● This study did not consider changes in the types of conditions  
10  
11 prompting people to visit hospitals and the ageing of the population.  
12  
13

## 14 15 16 17 **INTRODUCTION**

18  
19 Medical cost escalation is a major problem in both developed and  
20  
21 developing countries, including China.<sup>1,2</sup> Efforts to contain medical  
22  
23 expenditure growth may benefit from a better understanding of the  
24  
25 underlying drivers of increasing medical costs.  
26  
27  
28

29  
30 Studies decomposing growth in China's health expenditure into its  
31  
32 constituent parts since the 1990s have revealed different results. Zhai  
33  
34 et al.'s study used data from China's National Health Accounts studies  
35  
36 and Global Burden of Disease 2013 studies and decomposed the changes  
37  
38 in health expenditures by disease into population growth, population  
39  
40 ageing, disease prevalence rate, expenditure per case of disease, and  
41  
42 excess health price inflation. These authors found that 72.6% of the  
43  
44 increases in China's health expenditure between 1993 and 2012 was caused  
45  
46 by growth in health expenditure per prevalent case.<sup>3</sup> A recent study by  
47  
48 Yip et al. using China National Health Accounts data decomposed the growth  
49  
50 in health spending by healthcare type into an increase in visit volume  
51  
52 and an increase in charges per visit or admission. The study showed that  
53  
54  
55  
56  
57  
58  
59  
60

1  
2  
3  
4 the increase in visit volume accounted for approximately 70% of the  
5  
6 increase in the total health spending in China between 2008 and 2017,  
7  
8 while increases in charges per visit or admission accounted for  
9  
10 approximately 30% of the increase.<sup>4</sup> These studies examined the drivers  
11  
12 of health expenditure growth in China from different perspectives (cost  
13  
14 of disease or healthcare) during different periods since the 1990s.  
15  
16  
17  
18

19 Some existing studies explored spending drivers in the US,<sup>5,6,7</sup>  
20  
21 Switzerland<sup>8</sup> and Brazil<sup>9</sup> by decomposing growth in spending into its  
22  
23 constituent parts while focusing on two or more factors, including  
24  
25 population growth, population ageing, disease prevalence,  
26  
27 utilization/quantity, and cost/price. Among all these factors in the  
28  
29 decomposing models in the existing literature, the two primary factors  
30  
31 are quantity and price, and the other factors can be considered the  
32  
33 further decomposition of these two factors.  
34  
35  
36  
37  
38  
39

40 As the main body of China's health service delivery system, public  
41  
42 hospitals accounted for 92.8% of hospital inpatient admissions and 92.6%  
43  
44 of hospital ambulatory visits in 2008; the corresponding values decreased  
45  
46 to 81.8% and 85.3% in 2018.<sup>10</sup> Public hospital medical expenditures  
47  
48 accounted for approximately half of the total health expenditures in  
49  
50 2018.<sup>10 11</sup> Cost containment in public hospitals has been a key focus of  
51  
52  
53  
54 China's new round of health system reform since 2009.<sup>4,12</sup> Public hospital  
55  
56 reforms were launched in 2012, including altering provider payment,  
57  
58  
59  
60

1  
2  
3  
4 eliminating drug mark-up, and adjusting fee schedules.<sup>11</sup> A guidance  
5  
6 document to contain excess public hospital medical expenditure growth  
7  
8 issued by the central government in 2015 listed 21 monitoring indicators  
9  
10 of medical cost control for public hospitals.<sup>13</sup> Of these indicators, seven  
11  
12 indicators monitor charges per unit of service (charges per visit,  
13  
14 admission, or case), three indicators monitor service utilization, and  
15  
16 the remaining indicators mainly monitor the share of the cost of drugs,  
17  
18 diagnostic examinations or medical consumables in medical expenditures.  
19  
20 Based on these monitoring indicators, it seems that the assumption  
21  
22 underlying policy decisions was that price and intensity were the primary  
23  
24 drivers of medical costs. However, these reforms did not reduce the  
25  
26 overall medical expenditures.<sup>14 15</sup>

27  
28  
29  
30  
31  
32  
33  
34  
35 Our study extends the existing literature by focusing on the drivers  
36  
37 of the growth of national and provincial total medical expenditures of  
38  
39 public hospitals during the first decade of the new round of health system  
40  
41 reform in China. We focused on the growth in medical expenditure of public  
42  
43 hospitals because most of medical spending is by public hospitals and  
44  
45 because cost containment in public hospitals is the focus of health-care  
46  
47 delivery reform across China. We decompose growth in medical expenditure  
48  
49 into its primary policy-relevant constituent factors to quantify how  
50  
51 much of the growth in real total medical expenditure was attributable  
52  
53 to changes in service volume versus service price and intensity. We also  
54  
55  
56  
57  
58  
59  
60

1  
2  
3  
4 explored the impact of changes in the subcomponent factors of the service  
5  
6 volume, i.e., the population size, hospital utilization rates, and the  
7  
8 share of service utilization in public hospitals, on the growth of public  
9  
10 hospitals' real total medical expenditures. One of the main contributions  
11  
12 of this study is the provision of the region-specific decomposition rates  
13  
14 of 31 provinces, autonomous regions and municipalities in mainland China.  
15  
16 The results of this study could inform cost containment policies in China  
17  
18 and other countries that experience soaring medical expenditures.  
19  
20  
21  
22  
23  
24  
25  
26

## 27 **STUDY DATA AND METHODS**

### 32 **Data sources**

33  
34 We extracted eleven years of nationwide data and eight years of provincial  
35  
36 data from the China Health Statistical Yearbooks in 2009–2019 published  
37  
38 by the National Health Commission (originally called the Ministry of  
39  
40 Health).<sup>4 16</sup> We obtained aggregative information of public hospital  
41  
42 medical expenditures per visit or per admission discharged and outpatient  
43  
44 and inpatient service volumes of public and private hospitals per year.<sup>10</sup>  
45  
46  
47  
48  
49 The nationwide and provincial population size data in specific years  
50  
51 between 2008 and 2018 were obtained from the 2019 China Statistical  
52  
53 Yearbook, which provides nationwide and provincial population size data  
54  
55  
56  
57  
58 from 2008 to 2018.<sup>17</sup>  
59  
60

1  
2  
3  
4 We chose 2008 as the base year for the nationwide analysis and 2011  
5  
6 as the base year for the provincial analysis because the earliest  
7  
8 available years of nationwide and provincial public hospitals' service  
9  
10 volume and price and intensity data were 2008 and 2011, respectively.  
11  
12 Additionally, there were significant policy changes in 2009 and 2012  
13  
14 as mentioned above, rendering 2008 and 2011 appropriate as base years.  
15  
16 The year 2018 was selected as the end date for both the nationwide and  
17  
18 provincial analyses because the latest data we could obtain during our  
19  
20 study period was 2018, which was also the period of the first decade  
21  
22 of new round health system reform.  
23  
24  
25  
26  
27  
28  
29  
30  
31

### 32 **Patient and public involvement**

33  
34  
35 The data used for this study were directly harvested from China Health  
36  
37 Statistical Yearbooks and China Statistical Yearbook. Therefore there  
38  
39 was no direct patient and public involvement.  
40  
41  
42  
43  
44

### 45 **Variable definition**

46  
47  
48 In this paper, we use public hospital medical revenue variables as  
49  
50 expenditure indicators. According to the interpretation of the  
51  
52 indicators in the China Health Statistics Yearbook and previous studies,  
53  
54 hospital medical expenditures in this study fall into the following three  
55  
56 categories: medical services, drugs, and diagnostic  
57  
58  
59  
60



1  
2  
3  
4 examinations/medical consumables.<sup>14</sup> All expenditure variables in this  
5  
6 study were adjusted for inflation using the economy-wide consumer price  
7  
8 index of China from the International Monetary Fund and were reported  
9  
10  
11 in Chinese yuan in 2018 prices.<sup>18</sup>  
12  
13

14 Table 1 provides the definitions of the variables used in this study.  
15  
16 For outpatient care, the service volume was defined as the annual volume  
17  
18 of visits to public hospitals; the utilization rate was defined as annual  
19  
20 hospital visits per capita, including public and private hospital visits;  
21  
22 the share of public hospitals' utilization was defined as the fraction  
23  
24 of public hospitals in the number of hospital visits; and price and  
25  
26 intensity was defined as the mean expenditure per visit for public  
27  
28 hospitals. For inpatient care, the service volume was defined as the  
29  
30 annual volume of admissions discharged from public hospitals; the  
31  
32 utilization rate was defined as annual hospital admissions per capita,  
33  
34 including public and private hospital admissions; the share of public  
35  
36 hospitals' utilization was defined as the fraction of public hospitals  
37  
38 in the number of hospital admissions; and price and intensity was defined  
39  
40 as the mean expenditure per admission discharged from public hospitals.  
41  
42  
43  
44  
45  
46  
47  
48  
49  
50  
51  
52  
53  
54  
55  
56  
57  
58  
59  
60

**Table 1** Definitions of service volume, utilization rate, share of public hospitals' utilization, price and intensity, by type of care

| Care type  | Service volume                                                               | Utilization rate                                                               | Share of public hospitals' utilization                              | Price and intensity                                            |
|------------|------------------------------------------------------------------------------|--------------------------------------------------------------------------------|---------------------------------------------------------------------|----------------------------------------------------------------|
| Outpatient | Annual volume of visits to public hospitals outpatient emergency departments | Annual hospital (including public and private hospitals) visits per capita     | The share of public hospitals in the number of hospital visits.     | Public hospitals' medical expenditure per visit                |
| Inpatient  | Annual volume of admissions discharged from public hospitals                 | Annual hospital (including public and private hospitals) admissions per capita | The share of public hospitals in the number of hospital admissions. | Public hospitals' medical expenditure per admission discharged |

### Decomposition methods

The total medical expenditure of public hospitals is the product of two factors: (1) service volume and (2) price and intensity, as shown in the following equation:

$$TME_y = V_y \times P_y,$$

where  $y$  indicates the year;  $TME_y$  is the total medical expenditure;  $V_y$  is the service volume; and  $P_y$  is the service price and intensity.

To measure the relative effect of each factor, we used the decomposition method described by Das Gupta.<sup>19 20</sup> This decomposition was based on the equation above to calculate standardized expenditures for each factor and then calculate their additive contributions to the changes in

1  
2  
3  
4 hospital outpatient or inpatient total medical expenditures from 2008  
5  
6 to 2018. (for a more detailed description of the decomposition method,  
7  
8 see online appendix exhibit 1.1).  
9  
10

11 Given that the public hospitals' service volume can be expressed as  
12  
13 the product of the population size, hospital utilization rate, and share  
14  
15 of service utilization in public hospitals (the share of public hospitals  
16  
17 in the number of admissions or visits), its effect on the growth of real  
18  
19 total medical expenditures reflects the subcomponent effects of  
20  
21 population growth, changes in the utilization rate and changes in the  
22  
23 share of service utilization in public hospitals. We further explored  
24  
25 the impact of changes in the population size, utilization rate, and share  
26  
27 of service utilization in public hospitals. We further explored  
28  
29 the impact of changes in the population size, utilization rate, and share  
30  
31 of service utilization in public hospitals on the growth of total medical  
32  
33 expenditure of public hospitals by developing a four-factor  
34  
35 decomposition model as follows:  
36  
37  
38

$$TME_y = Pop_y \times \frac{V_{th,y}}{Pop_y} \times \frac{V_{ph,y}}{V_{th,y}} \times P_y'$$

39  
40 where  $y$  indicates the year;  $TME_y$  is the total medical expenditure of public  
41  
42 hospitals;  $Pop_y$  is the population size;  $V_{th,y}$  is the service volume of all  
43  
44 hospitals (including public and private hospitals) ;  $V_{ph,y}$  is the service  
45  
46 volume of public hospitals; and  $P_y$  is the service price and intensity  
47  
48 of public hospital care.  
49  
50  
51  
52  
53  
54

55 Then, we calculated their additive contributions to the growth of  
56  
57 public hospital outpatient or inpatient total medical expenditures from  
58  
59  
60

1  
2  
3  
4 2008 to 2018. The sum of the contributions of the changes in the population  
5  
6 size, utilization rate, and share of public hospitals' utilization was  
7  
8 approximately the same as the contribution of the changes in the service  
9  
10 volume in the above two-factor decomposition. (for a more detailed  
11  
12 description of the four-factor decomposition method, see online appendix  
13  
14 exhibit 1.2).  
15  
16  
17  
18  
19  
20  
21

## 22 **RESULTS**

23  
24 Both the inpatient and outpatient real total medical expenditures of  
25  
26 public hospitals increased annually from 2008 to 2018 (Table 2). In 2018,  
27  
28 the inpatient real total medical expenditure increased by 3.6-fold,  
29  
30 and the outpatient real total medical expenditure increased 2.9-fold  
31  
32 compared with the costs in 2008. The growth rates of inpatient and  
33  
34 outpatient real total medical expenditures showed downward trends.  
35  
36  
37  
38  
39 Inpatient and outpatient real total medical expenditures increased at  
40  
41 average annual rates of 18.2% and 14.4%, respectively, between 2008  
42  
43 and 2013 and decreased to 9.1% and 8.3% between 2013 and 2018. The average  
44  
45 annual growth rates of public hospitals' service volume and service  
46  
47 price and intensity also displayed downward trends, while the average  
48  
49 annual growth rate of public hospitals' service volume outpaced that  
50  
51 of service price and intensity during the same period.  
52  
53  
54  
55  
56  
57  
58  
59  
60

**Table 2** Medical expenditures and service volumes of public hospital inpatient and outpatient care in China (2008–18)

|                                | Inpatient                                          |                                 |                                      | Outpatient                                         |                             |                     |
|--------------------------------|----------------------------------------------------|---------------------------------|--------------------------------------|----------------------------------------------------|-----------------------------|---------------------|
|                                | Real total<br>medical<br>exp.<br>(billion<br>yuan) | Exp. per<br>admission<br>(yuan) | Admissions <sup>1</sup><br>(million) | Real total<br>medical<br>exp.<br>(billion<br>yuan) | Exp. per<br>visit<br>(yuan) | Visits<br>(million) |
| 2008                           | 456.8                                              | 6678.7                          | 68.4                                 | 285.0                                              | 172.8                       | 1649.1              |
| 2009                           | 571.2                                              | 7344.5                          | 77.8                                 | 338.3                                              | 191.3                       | 1768.9              |
| 2010                           | 676.2                                              | 7789.8                          | 86.8                                 | 380.6                                              | 203.1                       | 1873.8              |
| 2011                           | 770.4                                              | 7960.4                          | 96.8                                 | 426.1                                              | 207.6                       | 2052.5              |
| 2012                           | 930.6                                              | 8224.8                          | 113.1                                | 497.0                                              | 217.2                       | 2288.7              |
| 2013                           | 1054.3                                             | 8600.1                          | 122.6                                | 558.6                                              | 227.5                       | 2455.1              |
| 2014                           | 1190.1                                             | 8894.5                          | 133.8                                | 629.4                                              | 237.7                       | 2647.4              |
| 2015                           | 1278.5                                             | 9345.6                          | 136.8                                | 675.0                                              | 248.8                       | 2712.4              |
| 2016                           | 1406.1                                             | 9573.9                          | 146.9                                | 728.1                                              | 255.7                       | 2847.7              |
| 2017                           | 1517.6                                             | 9764.2                          | 155.4                                | 774.9                                              | 262.5                       | 2952.0              |
| 2018                           | 1629.1                                             | 9976.4                          | 163.3                                | 830.5                                              | 272.2                       | 3051.2              |
| <b>Annual growth rates (%)</b> |                                                    |                                 |                                      |                                                    |                             |                     |
| 2008–13                        | 18.2                                               | 5.2                             | 12.4                                 | 14.4                                               | 5.6                         | 8.3                 |
| 2013–18                        | 9.1                                                | 3.0                             | 5.9                                  | 8.3                                                | 3.7                         | 4.4                 |

**NOTES** Expenditures per admission discharged or per visit, admission and visit volume data were extracted from the China Health Statistical Yearbooks in 2009–2019. Total medical expenditure represents the authors' analysis of data based on the above equation. <sup>1</sup>Numbers of inpatients who were discharged from public hospitals.

Figure 1 reveals a 1172.3 billion yuan and a 545.5 billion yuan increase in inpatient and outpatient real total medical expenditures, respectively, for public hospitals from 2008 through 2018. (the exchange rate in 2018 was 6.6 Chinese yuan to one US dollar.) From 2008 to 2018, the increase in admission volume was associated with 67.4 % (790.3 billion yuan) of the observed increase in inpatient real total medical expenditure, while the change in price and intensity was associated with

1  
2  
3  
4 the remaining 32.6% (382.0 billion yuan). The increase in visit volume  
5  
6 was associated with 57.2% (312.0 billion yuan) of the observed increase  
7  
8 in outpatient real total medical expenditure, while the change in the  
9  
10 service price and intensity was associated with the remaining 42.8%  
11  
12 (233.5 billion yuan).  
13  
14  
15

16  
17 Figure 2 shows growth in the real total medical expenditure associated  
18  
19 with changes in each factor in the four-factor decomposition from 2008  
20  
21 to 2018. The increase in utilization rate contributed 73.7% (863.8  
22  
23 billion yuan of the 1172.0 billion yuan increase) of the growth in the  
24  
25 real total medical expenditure on inpatient care, and 60.3% (328.8  
26  
27 billion yuan of the 545.5 billion yuan increase) of the growth in the  
28  
29 real total medical expenditure on outpatient care. Population growth  
30  
31 was associated with a slight increase in inpatient (4.2%) and outpatient  
32  
33 (4.8%) total medical expenditures, while a lower share of public  
34  
35 hospitals' utilization was associated with a slight reduction in  
36  
37 inpatient (10.9%) and outpatient (8.1%) total medical expenditures.  
38  
39  
40  
41  
42  
43  
44

45  
46 Regarding public hospitals' inpatient and outpatient care in 31  
47  
48 provinces, autonomous regions and municipalities in mainland China,  
49  
50 growth in the service volume contributed more than growth in the service  
51  
52 price and intensity to the growth in the real total medical expenditures  
53  
54 in public hospital inpatient and outpatient care in most provinces from  
55  
56 2011 to 2018 (Table 3a). Regarding inpatient care, the growth in service  
57  
58  
59  
60

1  
2  
3  
4 volume contributed more than the growth in service price and intensity  
5  
6 to the growth in the real total medical expenditures in all provinces  
7  
8 except for Tibet. For example, the growth in service volume was associated  
9  
10 with 87.3% of the observed growth in the real total medical expenditure  
11  
12 in the inpatient sector in Zhejiang Province (38.2 billion yuan of the  
13  
14 43.8 billion yuan increase) . Regarding outpatient care, the growth in  
15  
16 service volume contributed more to growth in public hospital outpatient  
17  
18 real total medical expenditures in most provinces (23 of the 31  
19  
20 provinces) .  
21  
22  
23  
24  
25

26  
27 Increases in hospital utilization rates accounted for most increases  
28  
29 in real total medical expenditures on inpatient and outpatient care in  
30  
31 public hospitals in 31 provinces, autonomous regions and municipalities  
32  
33 in mainland China from 2011 to 2018 (Table 3b) . Regarding inpatient care,  
34  
35 increases in hospital utilization rates accounted for the largest  
36  
37 increases in real total medical expenditures of public hospitals in all  
38  
39 31 provinces, autonomous regions and municipalities. Regarding  
40  
41 outpatient care, increases in hospital utilization rates accounted for  
42  
43 the largest increases in real total medical expenditures of public  
44  
45 hospitals in 25 provinces, autonomous regions and municipalities, except  
46  
47 for 6 provinces, autonomous regions and municipalities, where increases  
48  
49 in price and intensity accounted for the largest increases in the real  
50  
51 total medical expenditures of public hospitals. Changes in the share  
52  
53  
54  
55  
56  
57  
58  
59  
60

1  
2  
3  
4 of public hospital service utilization were associated with reductions  
5  
6 in both inpatient and outpatient real total medical expenditures of  
7  
8 public hospitals in 30 provinces, autonomous regions and municipalities,  
9  
10 except for Xinjiang. Changes in the population size were associated with  
11  
12 increases in both inpatient and outpatient real total medical  
13  
14 expenditures of public hospitals in 28 provinces, autonomous regions  
15  
16 and municipalities, except for 3 provinces (Liaoning, Jilin and Heilong).  
17  
18  
19  
20  
21  
22  
23  
24  
25  
26  
27  
28  
29  
30  
31  
32  
33  
34  
35  
36  
37  
38  
39  
40  
41  
42  
43  
44  
45  
46  
47  
48  
49  
50  
51  
52  
53  
54  
55  
56  
57  
58  
59  
60



**Table 3a** Contributions of growths in the service volume and price and intensity to the growths of public hospital real total medical expenditures on inpatient and outpatient care in 31 provinces, autonomous regions and municipalities in mainland China, 2011-2018

| Province  | Inpatient      |                     | Outpatient     |                     |
|-----------|----------------|---------------------|----------------|---------------------|
|           | Service volume | Price and intensity | Service volume | Price and intensity |
| Beijing   | 77.7           | 22.3                | 51.5           | 48.5                |
| Tianjin   | 70.0           | 30.0                | 47.7           | 52.3*               |
| Hebei     | 56.7           | 43.3                | 67.2           | 32.8                |
| Shanxi    | 62.4           | 37.6                | 60.8           | 39.2                |
| IM        | 78.5           | 21.5                | 66.5           | 33.5                |
| Liaoning  | 65.9           | 34.1                | 48.3           | 51.7*               |
| Jilin     | 54.8           | 45.2                | 45.2           | 54.8*               |
| HLJ       | 72.2           | 27.8                | 54.7           | 45.3                |
| Shanghai  | 74.5           | 25.5                | 58.2           | 41.8                |
| Jiangsu   | 77.7           | 22.3                | 60.5           | 39.5                |
| Zhejiang  | 87.3           | 12.7                | 70.6           | 29.4                |
| Anhui     | 76.1           | 23.9                | 65.3           | 34.7                |
| Fujian    | 56.9           | 43.1                | 45.0           | 55.0*               |
| Jiangxi   | 59.6           | 40.4                | 46.1           | 53.9*               |
| Shandong  | 62.6           | 37.4                | 68.1           | 31.9                |
| Henan     | 59.8           | 40.2                | 59.0           | 41.0                |
| Hubei     | 67.4           | 32.6                | 70.4           | 29.6                |
| Hunan     | 66.2           | 33.8                | 61.5           | 38.5                |
| Guangdong | 65.1           | 34.9                | 36.0           | 64.0*               |
| Guangxi   | 63.8           | 36.2                | 58.1           | 41.9                |
| Hainan    | 68.9           | 31.1                | 55.7           | 44.3                |
| Chongqing | 76.1           | 23.9                | 59.1           | 40.9                |
| Sichuan   | 68.9           | 31.1                | 59.8           | 40.2                |
| Guizhou   | 82.3           | 17.7                | 76.0           | 24.0                |
| Yunnan    | 79.6           | 20.4                | 58.1           | 41.9                |
| Tibet     | 49.3           | 50.7*               | 34.7           | 65.3*               |
| Shaanxi   | 69.5           | 30.5                | 63.4           | 36.6                |
| Gansu     | 81.2           | 18.8                | 65.1           | 34.9                |
| Qinghai   | 60.9           | 39.1                | 37.5           | 62.5*               |
| Ningxia   | 68.8           | 31.2                | 58.7           | 41.3                |
| Xinjiang  | 63.6           | 36.4                | 63.7           | 36.3                |

**Table 3b** Contributions of changes in each factor in the 4-factor decomposition to the growth in real total medical expenditure on public hospital inpatient and outpatient care in 31 provinces, autonomous regions and municipalities in mainland China, 2011-2018

| Province  | Inpatient |                  |              |                     | Outpatient |                  |              |                     |
|-----------|-----------|------------------|--------------|---------------------|------------|------------------|--------------|---------------------|
|           | Pop. size | Utilization rate | Share of PHU | Price and intensity | Pop. size  | Utilization rate | Share of PHU | Price and intensity |
| Beijing   | 9.5       | 75.2             | -7.0         | 22.2                | 11.5       | 50.8             | -10.8        | 48.6                |
| Tianjin   | 24.4      | 44.6             | 1.2          | 29.8                | 35.8       | 37.2             | -25.4        | 52.4*               |
| Hebei     | 5.6       | 65.2             | -14.3        | 43.6                | 5.9        | 75.1             | -13.9        | 33.0                |
| Shanxi    | 4.7       | 74.3             | -17.0        | 38.0                | 5.0        | 65.1             | -9.5         | 39.3                |
| IM        | 3.0       | 82.6             | -7.2         | 21.6                | 3.0        | 69.5             | -6.0         | 33.5                |
| Liaoning  | -1.0      | 92.3             | -25.8        | 34.6                | -1.1       | 71.0             | -22.0        | 52.1                |
| Jilin     | -2.6      | 79.1             | -22.2        | 45.8                | -2.6       | 58.5             | -11.0        | 55.1                |
| HLJ       | -2.9      | 98.3             | -23.6        | 28.1                | -3.9       | 78.0             | -19.7        | 45.6                |
| Shanghai  | 4.6       | 72.0             | -2.0         | 25.5                | 6.0        | 55.1             | -2.9         | 41.8                |
| Jiangsu   | 2.9       | 85.4             | -10.7        | 22.5                | 3.1        | 69.6             | -12.3        | 39.7                |
| Zhejiang  | 7.6       | 88.8             | -9.1         | 12.7                | 9.1        | 72.1             | -10.7        | 29.4                |
| Anhui     | 8.5       | 82.0             | -14.5        | 24.0                | 7.0        | 65.6             | -7.3         | 34.7                |
| Fujian    | 9.4       | 57.5             | -9.9         | 43.1                | 8.3        | 40.1             | -3.3         | 54.9*               |
| Jiangxi   | 4.0       | 65.2             | -9.8         | 40.6                | 4.4        | 48.8             | -7.2         | 54.0*               |
| Shandong  | 5.9       | 70.4             | -13.9        | 37.6                | 6.2        | 73.3             | -11.5        | 32.0                |
| Henan     | 2.6       | 76.5             | -20.0        | 40.9                | 3.0        | 72.2             | -16.7        | 41.5                |
| Hubei     | 3.3       | 73.6             | -9.7         | 32.8                | 4.0        | 71.7             | -8.7         | 32.9                |
| Hunan     | 6.0       | 79.4             | -19.5        | 34.2                | 6.3        | 68.1             | -13.1        | 38.7                |
| Guangdong | 10.3      | 60.6             | -5.8         | 34.8                | 12.5       | 26.9             | -3.3         | 63.9*               |
| Guangxi   | 6.9       | 63.8             | -7.0         | 36.3                | 7.9        | 52.8             | -2.5         | 41.8                |
| Hainan    | 9.8       | 70.1             | -11.0        | 31.1                | 8.8        | 52.9             | -5.9         | 44.3                |
| Chongqing | 7.8       | 92.9             | -25.1        | 24.4                | 6.9        | 60.4             | -8.3         | 40.9                |
| Sichuan   | 4.6       | 80.4             | -16.4        | 31.4                | 4.2        | 63.3             | -7.8         | 40.3                |
| Guizhou   | 4.0       | 92.8             | -14.8        | 18.0                | 3.9        | 84.7             | -12.9        | 24.3                |
| Yunnan    | 5.5       | 83.0             | -9.0         | 20.5                | 5.0        | 59.5             | -6.5         | 41.9                |
| Tibet     | 10.8      | 55.5             | -17.5        | 51.3                | 12.1       | 36.6             | -14.3        | 65.6*               |
| Shaanxi   | 3.8       | 80.0             | -14.6        | 30.8                | 4.2        | 65.1             | -6.0         | 36.6                |
| Gansu     | 3.3       | 86.9             | -9.0         | 18.9                | 3.3        | 67.9             | -6.2         | 34.9                |
| Qinghai   | 7.2       | 65.4             | -11.8        | 39.3                | 8.0        | 42.0             | -12.7        | 62.7*               |
| Ningxia   | 11.2      | 77.7             | -20.3        | 31.5                | 9.2        | 57.8             | -8.3         | 41.3                |
| Xinjiang  | 20.9      | 42.7             | 0.1          | 36.2                | 17.2       | 43.2             | 3.6          | 36.0                |

**NOTES:** IM is Inner Mongolia, HLJ is Heilongjiang, Pop size is population size, Share of PHU

1  
2  
3 is the share of public hospitals' utilization. Provincial expenditures per admission discharged  
4 or per visit, admission and visit volume data have only been available since 2011 from the China  
5 Health Statistical Yearbooks in 2012-2019. \* The exception of provinces where increases in price  
6 and intensity accounted for the largest increases in the real total medical expenditures of  
7 public hospitals.  
8  
9

## 10 11 12 13 **Discussion**

14  
15 This study measured the increases in inpatient and outpatient real total  
16 medical expenditures of public hospitals and how service use and price  
17 were collectively associated with these increases from 2008 to 2018.  
18  
19 Our results show that the inpatient and outpatient real total medical  
20 expenditures of public hospitals increased annually, but the growth rate  
21 decreased. The growth in service use explains more of the growth in the  
22 real total medical expenditures of public hospitals in China than the  
23 growth in service price and intensity, especially for inpatient care.  
24  
25

26 The annual growth rate of inpatient and outpatient real total medical  
27 expenditures of public hospitals decreased by nearly half from 2013 to  
28 2018 compared to that during the period from 2008 to 2013. This finding  
29 is consistent with the goal of containing the excess growth of medical  
30 expenditures of public hospital reform since 2012.<sup>13</sup> Empirical studies  
31 in Beijing<sup>21 22</sup> and Guangdong<sup>23</sup> showed the same trend. Payment method  
32 reforms since 2011 have played a role in containing the excess growth  
33 of public hospital expenses.<sup>24</sup>  
34  
35

36 Our findings of the major drivers of public hospitals' medical  
37 expenditures differ from those reported by Zhai et al., who used data  
38  
39  
40  
41  
42  
43  
44  
45  
46  
47  
48  
49  
50  
51  
52  
53  
54  
55  
56  
57  
58  
59  
60

1  
2  
3  
4 from the 1993-2012 period and reported that the contribution of  
5  
6 increasing health expenditure per prevalent case to the growth in health  
7  
8 expenditures was more than 70%.<sup>3</sup> This study contradicts our finding that  
9  
10 approximately 70% of the increase in the inpatient real total medical  
11  
12 expenditure of public hospitals was associated with the service volume  
13  
14 based on data from the 2008-2018 period. Several differences can  
15  
16 contribute to the varying results across the studies, such as different  
17  
18 perspectives (e.g., cost of disease vs. hospital care) and component  
19  
20 factors. A key source of the differences may be the varying time periods.  
21  
22 Yip et al.'s results closely parallel ours. Using data from the 2008-2017  
23  
24 period, Yip et al. found that the increase in service volume accounted  
25  
26 for approximately 70% of the increase in total health spending in China.<sup>4</sup>  
27  
28  
29  
30  
31  
32  
33

34  
35 Our findings also suggest that most of the service volume effect is  
36  
37 due to an increase in the hospital utilization rate. Our findings closely  
38  
39 parallel Moses et al.'s<sup>25</sup> results. Moses et al.'s decomposition of change  
40  
41 in the volume of outpatient visits and inpatient admissions by countries  
42  
43 from 1990-2016 showed that in China, more than 80% of the increase in  
44  
45 volume of outpatient visits and inpatient admissions was due to an  
46  
47 increase in age-sex utilization rates, and less than 20% could be  
48  
49 attributed to changes in the other three factors (population growth,  
50  
51 population ageing, and sex composition).<sup>25</sup>  
52  
53  
54  
55  
56  
57

58 Is the increase in service use acceptable? One study indicated that  
59  
60

1  
2  
3  
4 the need factor (i.e., whether one had a chronic disease) was a dominant  
5  
6 factor determining health service utilization among rural residents in  
7  
8  
9 China.<sup>26</sup> According to the China National Health Services Survey, the  
10  
11 prevalence of chronic diseases among respondents aged 65 and above  
12  
13 increased from 46.8% in 2008 to 62.3% in 2018.<sup>27 28</sup> The share of population  
14  
15 aged 65 and above increased from 8.3% in 2008 to 11.9% in 2018.<sup>17</sup> Coupled  
16  
17 with the soaring real gross domestic product and declining share of  
18  
19 out-of-pocket spending on health services, the affordability of health  
20  
21 services has improved.<sup>4,29</sup> An extensive body of literature highlights the  
22  
23 impact of expanding China's basic medical insurance on increasing health  
24  
25 service use, especially inpatient services.<sup>30-34</sup> It is plausible that  
26  
27 rising hospital service utilization is related to the increase in the  
28  
29 underlying need for and improvements in access to hospital services.  
30  
31  
32 However, the increase in health service utilization may also be  
33  
34 supply-induced.<sup>35</sup> However, because underutilization was a concern before  
35  
36 the health system reform initiated in 2009, the increase in hospital  
37  
38 service utilization currently represents as improvements in access.  
39  
40  
41  
42  
43  
44  
45  
46  
47

48 These findings may inform health policy makers, whose current cost  
49  
50 contains policy instruments mainly to control the cost per visit or per  
51  
52 admission,<sup>13</sup> that controlling price and intensity growth are crucial,  
53  
54 but their effect on containing medical costs could be limited. In the  
55  
56 coming years, health service utilization is likely to increase due to  
57  
58  
59  
60

1  
2  
3  
4 the ageing population and the increased burden of noncommunicable  
5  
6 diseases. A study of China's health expenditure projections showed that  
7  
8 the increase in services per case of disease and unit cost would  
9  
10 contribute 4.3 and 2.4 percentage points, respectively, of the 8.4%  
11  
12 annual average growth rate in health expenditure during the 2015–2035  
13  
14 period.<sup>36</sup> Controlling service utilization growth can be essential through  
15  
16 a nationwide effort for a healthier population, which could include  
17  
18 disease prevention, healthy ageing, ensuring quality care and minimizing  
19  
20 unreasonable healthcare demands.<sup>37,38</sup> Positive incentive mechanisms  
21  
22 should be established to enhance an integrated medical and long-term  
23  
24 care delivery system, which would be expected to increase outpatient  
25  
26 and long-term care in primary facilities and prevent unnecessary  
27  
28 hospitalization.  
29  
30  
31  
32  
33  
34  
35  
36

37 However, this study has several limitations. First, the analysis relies  
38  
39 on government administrative data, which may be subject to reporting  
40  
41 errors. Second, due to the lack of a price index specific to the health  
42  
43 sector in China, this study cannot distinguish between the contributions  
44  
45 of service price and service intensity. Third, due to the lack of  
46  
47 age-specific price and intensity of public hospitals' inpatient and  
48  
49 outpatient care for disease conditions in both base year and end year,  
50  
51 this study did not consider changes in types of conditions prompting  
52  
53 people to visit the hospitals and the aging of the population. Further  
54  
55  
56  
57  
58  
59  
60

1  
2  
3  
4 research is needed to identify the sources of the increase in public  
5  
6 hospital medical expenditures by type of condition and by controlling  
7  
8 for ageing, which could provide crucial evidence for decision makers.  
9  
10  
11  
12  
13

## 14 **Conclusions**

15  
16 We conclude that service use, rather than price, appears to be the major  
17  
18 driver of the increases in China's hospital medical expenditures. An  
19  
20 important policy implication for China and other countries with similar  
21  
22 drivers is that the effect of controlling price and intensity growth  
23  
24 on containing medical costs could be limited and controlling service  
25  
26 utilization growth could be essential.  
27  
28  
29  
30  
31  
32  
33  
34

## 35 **Author Contributions**

36  
37 YX and LY designed and conceptualized the study. YX conducted the  
38  
39 acquisition, analysis and interpretation of the data and drafted the  
40  
41 manuscript. LY reviewed the manuscript. LJ and RK reviewed and edited  
42  
43 the manuscript. All authors read and approved the final manuscript.  
44  
45  
46

## 47 **Funding**

48  
49 This research received no specific grants from any funding agency in  
50  
51 the public, commercial or not-for-profit sectors.  
52  
53  
54  
55  
56

## 57 **Competing interests**

58  
59 The authors declare that they have no competing interests.  
60

### **Date availability statement**

Raw data used in our study are publicly available, and all data sources have been cited in the methods section. The data used to support the findings of this study are available from the corresponding author upon request.

### **Patient consent for publication**

Not required.

### **Ethics statement**

No human participants included.

### **Acknowledgements**

We would like to acknowledge Guangyu Hu, Ayan Mao and Zhenzhen Rao for providing feedback on early paper drafts.

### **References**

1. Dieleman J, Campbell M, Chapin A, et al. Evolution and patterns of global health financing 1995–2014: development assistance for health, and government, prepaid private, and out-of-pocket health spending in 184 countries. *The Lancet* 2017;389(10083):1981–2004.



- 1  
2  
3  
4 doi: 10.1016/s0140-6736(17)30874-7  
5  
6  
7 2. Fan VY, Savedoff WD. The health financing transition: a conceptual  
8  
9 framework and empirical evidence. *Soc Sci Med* 2014;105:112-21. doi:  
10  
11 10.1016/j.socscimed.2014.01.014 [published Online First:  
12  
13 2014/02/15]  
14  
15  
16  
17 3. Zhai T, Goss J, Li J. Main drivers of health expenditure growth in  
18  
19 China: a decomposition analysis. *BMC Health Services Research*  
20  
21 2017;17(1):185. doi: 10.1186/s12913-017-2119-1  
22  
23  
24  
25 4. Yip WN, Fu HQ, Chen AT, et al. 10 years of health-care reform in China:  
26  
27 progress and gaps in Universal Health Coverage. *Lancet*  
28  
29 2019;394(10204):1192-204. doi: Doi 10.1016/S0140-6736(19)32136-1  
30  
31  
32  
33 5. Roehrig CS, Rousseau DM. The Growth In Cost Per Case Explains Far  
34  
35 More Of US Health Spending Increases Than Rising Disease Prevalence.  
36  
37 *Health Affairs* 2011;30(9):1657-63.  
38  
39  
40  
41 6. Starr M, Dominiak L, Aizcorbe A. Decomposing Growth In Spending Finds  
42  
43 Annual Cost Of Treatment Contributed Most To Spending Growth,  
44  
45 1980-2006. *Health Affairs* 2014;33(5):823-31.  
46  
47  
48  
49 7. Dieleman JL, Squires E, Bui AL, et al. Factors Associated With  
50  
51 Increases in US Health Care Spending, 1996-2013. *Jama-J Am Med Assoc*  
52  
53 2017;318(17):1668-78. doi: 10.1001/jama.2017.15927  
54  
55  
56  
57 8. Stucki M. Factors related to the change in Swiss inpatient costs by  
58  
59 disease: a 6-factor decomposition. *The European journal of health*  
60

- 1  
2  
3  
4 *economics : HEPAC : health economics in prevention and care*  
5  
6 2021;22(2):195-221. doi: 10.1007/s10198-020-01243-3 [published  
7  
8 Online First: 2021/01/13]  
9  
10  
11 9. Alves JD, Osorio-de-Castro CGS, Wettermark B, et al.  
12  
13  
14 Immunosuppressants in Brazil: underlying drivers of spending trends,  
15  
16 2010-2015. *Expert Review of Pharmacoeconomics & Outcomes Research*  
17  
18 2018;18(5):565-72. doi: 10.1080/14737167.2018.1485098  
19  
20  
21  
22 10. The National Health Commission. China Health Statistical  
23  
24 Yearbook-2019. Beijing, China: Peking Union Medical College Press  
25  
26 2019.  
27  
28  
29  
30 11. Xu J, Jian W, Zhu K, et al. Reforming public hospital financing in  
31  
32 China: progress and challenges. *BMJ* 2019;365:14015. doi:  
33  
34 10.1136/bmj.14015 [published Online First: 2019/06/23]  
35  
36  
37  
38 12. Meng QY, Mills A, Wang LD, et al. What can we learn from China's  
39  
40 health system reform? *BMJ* 2019;365(12349) doi:  
41  
42 <https://doi.org/10.1136/bmj.12349>  
43  
44  
45  
46 13. Xinhua News Agency. Five departments of the State Council jointly  
47  
48 issued a document to control the unreasonable increase of medical  
49  
50 expenses in public hospitals 2015 [Available from:  
51  
52 [http://www.gov.cn/xinwen/2015-11/06/content\\_5005927.htm](http://www.gov.cn/xinwen/2015-11/06/content_5005927.htm) accessed  
53  
54  
55 8 Dec. 2020.  
56  
57  
58  
59 14. Fu HQ, Li L, Yip W. Intended and unintended impacts of price changes  
60

- 1  
2  
3  
4 for drugs and medical services: Evidence from China. *Social Science*  
5  
6 & *Medicine* 2018;211:114-22. doi: 10.1016/j.socscimed.2018.06.007  
7  
8
- 9 15. Wang Y, Zhang Y, Ma C, et al. Limited effects of the comprehensive  
10  
11 pricing healthcare reform in China. *Public Health* 2019;175:4-7. doi:  
12  
13 10.1016/j.puhe.2019.06.014  
14  
15
- 16 16. Xinhua News Agency. The state council institutional reform plan 2018  
17  
18 [Available from:  
19  
20 [http://www.gov.cn/xinwen/2018-03/17/content\\_5275116.htm](http://www.gov.cn/xinwen/2018-03/17/content_5275116.htm) accessed  
21  
22  
23 Jun 25 2021.  
24  
25
- 26 17. National Bureau of Statistics. China Statistical Yearbook 2019.  
27  
28 Beijing, China: China Statistics Press 2019.  
29  
30
- 31 18. International Monetary Fund. IMF Executive Board Concludes 2019  
32  
33 Article IV Consultation with the People's Republic of China. 2019.  
34  
35 [https://www.imf.org/en/News/Articles/2019/08/09/pr19314-china-i](https://www.imf.org/en/News/Articles/2019/08/09/pr19314-china-imf-executive-board-concludes-2019-article-iv-consultation)  
36  
37  
38  
39  
40  
41  
42  
43 (accessed 30 Sep 2019).  
44
- 45 19. Das Gupta P. Decomposition of the difference between two rates and  
46  
47 its consistency when more than two populations are involved.  
48  
49 *Mathematical Population Studies:: An International Journal of*  
50  
51 *Mathematical Demography* 1991;3(2):105-25.  
52  
53  
54
- 55 20. Das Gupta P. Standardization and decomposition of rates: a users's  
56  
57 manual: US Department of Commerce, Economics and Statistics  
58  
59  
60

- Administration, Bureau of the Census 1993.
21. Liu X, Xu J, Yuan B, et al. Containing medical expenditure: lessons from reform of Beijing public hospitals. *BMJ* 2019;365:12369. doi: 10.1136/bmj.12369 [published Online First: 2019/06/23]
22. Li BY, Man XW, Fang YY, et al. Analysis on the Cost Changes of Total Health Expenditure of Medical Institutions In Beijing During the 12th 5-Year Plan Period. *Chinese Journal of Social Medicine* 2018;35(5):107-10.
23. Deng J, Song XG, Xu CW, et al. Empirical Analysis and Optimization Research of Medical Service Price Reform in Urban Public Hospitals of Guangdong. *Chinese Health Economy* 2018;37(7):37-40.
24. Yan XL, Rao KQ, Hu LL, et al. Discussions on the progress and problems of public hospital payment system reforms in China. *Chin J Hosp Admin* 2015;31(2):84-86.
25. Moses MW, Pedroza P, Baral R, et al. Funding and services needed to achieve universal health coverage: applications of global, regional, and national estimates of utilisation of outpatient visits and inpatient admissions from 1990 to 2016, and unit costs from 1995 to 2016. *Lancet Public Health* 2019;4(1):E49-E73.
26. Li YN, Nong DX, Wei B, et al. The impact of predisposing, enabling, and need factors in utilization of health services among rural residents in Guangxi, China. *Bmc Health Services Research* 2016;16:9.

1  
2  
3  
4 doi: 10.1186/s12913-016-1825-4  
5

- 6  
7 27. Center for Health Statistics and Information NHC. An Analysis Report  
8  
9 of National Health Service Survey in China, 2018. Beijing, China:  
10  
11 People's Medical Publishing House 2021.  
12  
13  
14 28. Center for Health Statistics and Information MOH. An Analysis Report  
15  
16 of National Health Service Survey in China, 2008. Beijing, China:  
17  
18 Peking Union Medical College Press 2009.  
19  
20  
21  
22 29. Meng Q, Xu L, Zhang Y, et al. Trends in access to health services  
23  
24 and financial protection in China between 2003 and 2011: a  
25  
26 cross-sectional study. *Lancet* 2012;379(9818):805-14. doi:  
27  
28 10.1016/s0140-6736(12)60278-5  
29  
30  
31  
32 30. Su D, Chen Y, Gao H, et al. Effect of integrated urban and rural  
33  
34 residents medical insurance on the utilization of medical services  
35  
36 by residents in China: a propensity score matching with  
37  
38 difference-in-differences regression approach. *BMJ Open*  
39  
40 2019(9):E026408.  
41  
42  
43  
44  
45 31. Liu H, Zhao Z. Does health insurance matter? Evidence from China's  
46  
47 urban resident basic medical insurance. *Journal of Comparative*  
48  
49 *Economics* 2014;42(4):1007-20.  
50  
51  
52  
53 32. Zhang YG, Dong D, Xu L, et al. Equity in health care after 10 years  
54  
55 of the New Rural Co-operative Medical Insurance Scheme in China:  
56  
57 an analysis of national survey data. *Lancet* 2018;392:35-35.  
58  
59  
60

- 1  
2  
3  
4 33. Babiarz KS, Miller G, Yi HM, et al. China's New Cooperative Medical  
5  
6 Scheme Improved Finances Of Township Health Centers But Not The  
7  
8 Number Of Patients Served. *Health Affairs* 2012;31(5):1065-74. doi:  
9  
10 10.1377/hlthaff.2010.1311  
11  
12  
13  
14 34. Xu J, Wang J, King M, et al. Rural-urban disparities in the utilization  
15  
16 of mental health inpatient services in China: the role of health  
17  
18 insurance. *Int J Health Econ Manag* 2018;18(4):377-93. doi:  
19  
20 10.1007/s10754-018-9238-z [published Online First: 2018/03/29]  
21  
22  
23  
24 35. Zhang H, Hu HM, Wu C, et al. Impact of China's Public Hospital Reform  
25  
26 on Healthcare Expenditures and Utilization: A Case Study in ZJ  
27  
28 Province. *Plos One* 2015;10(11) doi: 10.1371/journal.pone.0143130  
29  
30  
31  
32 36. Zhai TM, Goss J, Dmytraczenko T, et al. China's Health Expenditure  
33  
34 Projections To 2035: Future Trajectory And The Estimated Impact Of  
35  
36 Reforms. *HEALTH AFFAIRS* 2019;38(5):835-43. doi:  
37  
38 10.1377/hlthaff.2018.05324  
39  
40  
41  
42 37. Meng Y, Yan X, li X, et al. Principal concept and practices and  
43  
44 enlightenment of managing health demand in developed countries.  
45  
46 *Chinese Journal of Health Management* 2016;10(3):241-45.  
47  
48  
49  
50 38. Stadhouders N, Kruse F, Tanke M, et al. Effective healthcare  
51  
52 cost-containment policies: A systematic review. *Health Policy*  
53  
54 2019;123(1):71-79. doi:  
55  
56 <https://doi.org/10.1016/j.healthpol.2018.10.015>  
57  
58  
59  
60

## Figure legends

Figure 1 Contributions of growth in service volume and price and intensity to growth in the real total medical expenditure of public hospitals, 2008-2018

(A) The first panel shows the absolute contribution (billion yuan) of each factor; (B) The second panel shows the relative contribution (%) of each factor. Colours represent the contribution of each factor to the overall growth in real total medical expenditure.

Figure 2 Growth in the real total medical expenditure of public hospitals associated with changes in each factor in the 4-factor decomposition by type of care, 2008-2018

Growth in the real total medical expenditure of public hospitals from 2008 to 2018 were decomposed into changes in four factors: population size, utilization rate, share of service utilization in public hospitals, and price and intensity. (A) The first panel shows the absolute contribution (billion yuan) of each factor; (B) The second panel shows the relative contribution (%) of each factor. Colours represent the contribution of each factor to the overall growth in real total medical expenditure. Bars below zero show that the factor contributed to a decrease and bars above zero show an increase.

1  
2  
3  
4  
5  
6  
7  
8  
9  
10  
11  
12  
13  
14  
15  
16  
17  
18  
19  
20  
21  
22  
23  
24  
25  
26  
27  
28  
29  
30  
31  
32  
33  
34  
35  
36  
37  
38  
39  
40  
41  
42  
43  
44  
45  
46  
47  
48  
49  
50  
51  
52  
53  
54  
55  
56  
57  
58  
59  
60

For peer review only



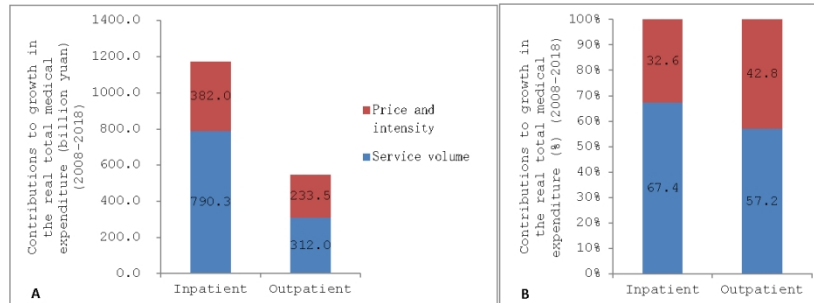

Figure 1 Contributions of growth in service volume and price and intensity to growth in the real total medical expenditure of public hospitals, 2008-2018  
 (A) The first panel shows the absolute contribution (billion yuan) of each factor; (B) The second panel shows the relative contribution (%) of each factor. Colours represent the contribution of each factor to the overall growth in real total medical expenditure.

Figure 1 Contributions of growth in service volume and price and intensity to growth in the real total medical expenditure of public hospitals, 2008-2018

(A) The first panel shows the absolute contribution (billion yuan) of each factor; (B) The second panel shows the relative contribution (%) of each factor. Colours represent the contribution of each factor to the overall growth in real total medical expenditure.

209x113mm (200 x 200 DPI)

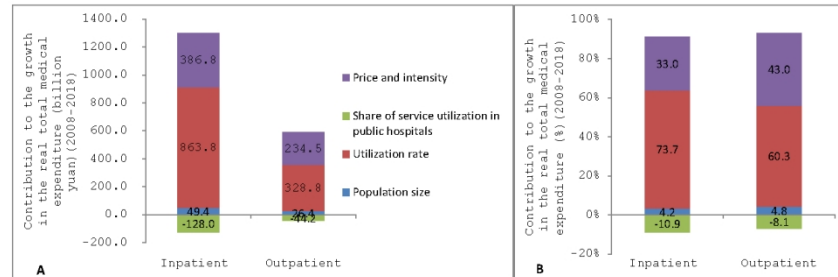

Figure 2 Growth in the real total medical expenditure of public hospitals associated with changes in each factor in the 4-factor decomposition by type of care, 2008-2018  
Growth in the real total medical expenditure of public hospitals from 2008 to 2018 were decomposed into changes in four factors: population size, utilization rate, share of service utilization in public hospitals, and price and intensity. (A) The first panel shows the absolute contribution (billion yuan) of each factor; (B) The second panel shows the relative contribution (%) of each factor. Colours represent the contribution of each factor to the overall growth in real total medical expenditure. Bars below zero show that the factor contributed to a decrease and bars above zero show an increase.

Figure 2 Growth in the real total medical expenditure of public hospitals associated with changes in each factor in the 4-factor decomposition by type of care, 2008-2018

Growth in the real total medical expenditure of public hospitals from 2008 to 2018 were decomposed into changes in four factors: population size, utilization rate, share of service utilization in public hospitals, and price and intensity. (A) The first panel shows the absolute contribution (billion yuan) of each factor; (B) The second panel shows the relative contribution (%) of each factor. Colours represent the contribution of each factor to the overall growth in real total medical expenditure. Bars below zero show that the factor contributed to a decrease and bars above zero show an increase.

206x117mm (200 x 200 DPI)

## Appendix exhibit 1.

### Decomposition-standardization methods

#### 1.1 The case of two factors

To measure the relative effect of each of the two factors, we used the decomposition method described by Das Gupta<sup>1,2</sup>. This decomposition was based on the calculation of the standardized rates of each factor, and then, we calculated the additive contributions of each factor to the changes in hospital outpatient or inpatient total expenditure in different years from 2008 to 2018 using the following equations:

Price and intensity standardized medical expenditure:  $y_0: \frac{P_{y1}+P_{y0}}{2} V_{y0}$

Price and intensity standardized medical expenditure:  $y_1: \frac{P_{y1}+P_{y0}}{2} V_{y1}$ .

The difference between the  $y_0$  price and intensity standardized medical expenditure and the  $y_1$  price and intensity standardized medical expenditure is the effect of the difference in the service volume, or the contribution of the difference in the service volume to the difference in the medical expenditure between  $y_0$  and  $y_1$  based on the following equation:

$$V_a = \frac{P_{y1}+P_{y0}}{2} (V_{y1} - V_{y0}).$$

Similarly, the difference between the  $y_0$  service volume standardized medical expenditure and the  $y_1$  service volume standardized medical expenditure is the effect of the difference in the price and intensity, or the contribution of the difference in the price and intensity to the difference in the medical expenditure between  $y_0$  and  $y_1$  based on the following equation:

$$P_a = \frac{V_{y1}+V_{y0}}{2} (P_{y1} - P_{y0}).$$

1  
2  
3  
4 Then, we obtain the following identity:

$$5 \quad \Delta TME = TME_{y_1} - TME_{y_0} = V_a + P_a.$$

6  
7  
8 The relative contributions of the two factors can be expressed as follows:

$$9 \quad V_r = V_a / \Delta TME * 100\%,$$

$$10 \quad P_r = P_a / \Delta TME * 100\%,$$

11  
12  
13  
14  
15  
16  
17 where  $\Delta TME$  is the change in the total medical expenditures between  $y_1$   
18  
19 and  $y_0$  (e.g., 2008 and 2018).  $V_a$  is the difference in the total medical  
20  
21 expenditures associated with the difference in the service volume in  
22  
23 counterfactual scenarios if the price and intensities were identical  
24  
25 in the two years;  $P_a$  is the difference in the total medical expenditures  
26  
27 associated with the difference in the service price and intensity in  
28  
29 counterfactual scenarios if the service volumes were identical in the  
30  
31 two years;  $V_r$  is the relative contribution rate of the difference in the  
32  
33 total medical expenditure attributed to the in the service volume by  
34  
35 expressed as a percentage; and  $P_r$  is the relative contribution rate of  
36  
37 the difference in the total medical expenditure attributed to the  
38  
39 difference in the service price and intensity by expressed as a  
40  
41 percentage.  
42  
43  
44  
45  
46  
47  
48  
49

## 50 1.2 The case of four factors

51  
52 The following four factors were constructed: (1) the total Chinese  
53  
54 population, (2) the utilization rate (hospital visits per capita), (3)  
55  
56 the share of public hospital service utilization, (4) the service price  
57  
58 and intensity; then, the total medical expenditure of public hospitals  
59  
60 can be written as follows:

$$TME_y = Pop_y \times \frac{V_{th,y}}{Pop_y} \times \frac{V_{ph,y}}{V_{th,y}} \times P_y,$$

where  $y$  indicates the year;  $TME_y$  is the total medical expenditure of public hospitals;  $Pop_y$  is the population size;  $V_{th,y}$  is the service volume of all hospitals (including public and private hospitals);  $V_{ph,y}$  is the service volume of public hospitals; and  $P_y$  is the service price and intensity of public hospital care.

To make it easier to write the above equation, the total medical expenditure can be written as follows:

$$TME_y = \alpha \beta \gamma \delta.$$

Then, we can express the total medical expenditure in  $y_0$  and  $y_1$  as follows:

$$TME_{y_0} = ABCD, \quad TME_{y_1} = abcd$$

From the decomposition method described by Das Gupta<sup>1,2</sup>, we obtain  $\beta \gamma \delta$ -standardized expenditure as follows:

$$\text{in } y_0 = Q(A),$$

$$\text{in } y_1 = Q(a),$$

such that

$$\alpha\_effect = Q(a-A),$$

where  $Q$  is a function of  $b, c, d, B, C, D$  given by the following:

$$Q = Q(b, c, d, B, C, D) = \frac{bcd + BCD}{4} + \frac{bcd + bCd + Bcd + BCD + Bcd + bcd}{12}.$$

Other standardized total medical expenditure and factor effects can be easily derived by interchanging the letters in the above equations. For example, the  $\alpha \gamma \delta$  standardized total medical expenditure and effect are obtained by substituting  $b, a, B, A$  for  $a, b, A, B$ , respectively.

Then, we obtain the following identity:

$$\Delta TME = TME_{y_1} - TME_{y_0} = \alpha\_effect + \beta\_effect + \gamma\_effect + \delta\_effect$$

1  
2  
3  
4  
5  
6  
7  
8  
9  
10  
11  
12  
13  
14  
15  
16  
17  
18  
19  
20  
21  
22  
23  
24  
25  
26  
27  
28  
29  
30  
31  
32  
33  
34  
35  
36  
37  
38  
39  
40  
41  
42  
43  
44  
45  
46  
47  
48  
49  
50  
51  
52  
53  
54  
55  
56  
57  
58  
59  
60

**Note**

1. Das Gupta P. Decomposition of the difference between two rates and its consistency when more than two populations are involved. *Mathematical Population Studies: An International Journal of Mathematical Demography* 1991;3(2):105-25.
2. Das Gupta P. Standardization and decomposition of rates: a users's manual: US Department of Commerce, Economics and Statistics Administration, Bureau of the Census 1993.

For peer review only

**The RECORD statement – checklist of items, extended from the STROBE statement, that should be reported in observational studies using routinely collected health data.**

|                           | Item No. | STROBE items                                                                                                                                                                               | Location in manuscript where items are reported | RECORD items                                                                                                                                                                                                                                                                                                                                                                                                                                | Location in manuscript where items are reported                                   |
|---------------------------|----------|--------------------------------------------------------------------------------------------------------------------------------------------------------------------------------------------|-------------------------------------------------|---------------------------------------------------------------------------------------------------------------------------------------------------------------------------------------------------------------------------------------------------------------------------------------------------------------------------------------------------------------------------------------------------------------------------------------------|-----------------------------------------------------------------------------------|
| <b>Title and abstract</b> |          |                                                                                                                                                                                            |                                                 |                                                                                                                                                                                                                                                                                                                                                                                                                                             |                                                                                   |
|                           | 1        | (a) Indicate the study's design with a commonly used term in the title or the abstract (b) Provide in the abstract an informative and balanced summary of what was done and what was found |                                                 | RECORD 1.1: The type of data used should be specified in the title or abstract. When possible, the name of the databases used should be included.<br><br>RECORD 1.2: If applicable, the geographic region and timeframe within which the study took place should be reported in the title or abstract.<br><br>RECORD 1.3: If linkage between databases was conducted for the study, this should be clearly stated in the title or abstract. | RECORD 1.1 and 1.2 were reported in the Design section of the abstract in page 2. |
| <b>Introduction</b>       |          |                                                                                                                                                                                            |                                                 |                                                                                                                                                                                                                                                                                                                                                                                                                                             |                                                                                   |
| Background rationale      | 2        | Explain the scientific background and rationale for the investigation being reported                                                                                                       |                                                 |                                                                                                                                                                                                                                                                                                                                                                                                                                             | Page 4, 5 and 6.                                                                  |
| Objectives                | 3        | State specific objectives, including any prespecified hypotheses                                                                                                                           |                                                 |                                                                                                                                                                                                                                                                                                                                                                                                                                             | Page 6 and 7.                                                                     |
| <b>Methods</b>            |          |                                                                                                                                                                                            |                                                 |                                                                                                                                                                                                                                                                                                                                                                                                                                             |                                                                                   |
| Study Design              | 4        | Present key elements of study design early in the paper                                                                                                                                    |                                                 |                                                                                                                                                                                                                                                                                                                                                                                                                                             | Page 10, 11 and 12.                                                               |
| Setting                   | 5        | Describe the setting, locations, and relevant dates, including periods of recruitment, exposure, follow-up, and data collection                                                            |                                                 |                                                                                                                                                                                                                                                                                                                                                                                                                                             | Page 7 and 8.                                                                     |
| Participants              | 6        | (a) <i>Cohort study</i> - Give the eligibility criteria, and the                                                                                                                           |                                                 | RECORD 6.1: The methods of study population selection (such as codes or                                                                                                                                                                                                                                                                                                                                                                     | Not applicable.                                                                   |

|                              |    |                                                                                                                                                                                                                                                                                                                                                                                                                                                                                                                                                                                                                                                             |  |                                                                                                                                                                                                                                                                                                                                                                                                                                                                                                                                                                                                                              |                      |
|------------------------------|----|-------------------------------------------------------------------------------------------------------------------------------------------------------------------------------------------------------------------------------------------------------------------------------------------------------------------------------------------------------------------------------------------------------------------------------------------------------------------------------------------------------------------------------------------------------------------------------------------------------------------------------------------------------------|--|------------------------------------------------------------------------------------------------------------------------------------------------------------------------------------------------------------------------------------------------------------------------------------------------------------------------------------------------------------------------------------------------------------------------------------------------------------------------------------------------------------------------------------------------------------------------------------------------------------------------------|----------------------|
|                              |    | <p>sources and methods of selection of participants. Describe methods of follow-up</p> <p><i>Case-control study</i> - Give the eligibility criteria, and the sources and methods of case ascertainment and control selection. Give the rationale for the choice of cases and controls</p> <p><i>Cross-sectional study</i> - Give the eligibility criteria, and the sources and methods of selection of participants</p> <p><i>(b) Cohort study</i> - For matched studies, give matching criteria and number of exposed and unexposed</p> <p><i>Case-control study</i> - For matched studies, give matching criteria and the number of controls per case</p> |  | <p>algorithms used to identify subjects) should be listed in detail. If this is not possible, an explanation should be provided.</p> <p>RECORD 6.2: Any validation studies of the codes or algorithms used to select the population should be referenced. If validation was conducted for this study and not published elsewhere, detailed methods and results should be provided.</p> <p>RECORD 6.3: If the study involved linkage of databases, consider use of a flow diagram or other graphical display to demonstrate the data linkage process, including the number of individuals with linked data at each stage.</p> |                      |
| Variables                    | 7  | Clearly define all outcomes, exposures, predictors, potential confounders, and effect modifiers. Give diagnostic criteria, if applicable.                                                                                                                                                                                                                                                                                                                                                                                                                                                                                                                   |  | RECORD 7.1: A complete list of codes and algorithms used to classify exposures, outcomes, confounders, and effect modifiers should be provided. If these cannot be reported, an explanation should be provided.                                                                                                                                                                                                                                                                                                                                                                                                              | Page 8 and 9 and 10. |
| Data sources/<br>measurement | 8  | For each variable of interest, give sources of data and details of methods of assessment (measurement). Describe comparability of assessment methods if there is more than one group                                                                                                                                                                                                                                                                                                                                                                                                                                                                        |  |                                                                                                                                                                                                                                                                                                                                                                                                                                                                                                                                                                                                                              | Page 7 and 8.        |
| Bias                         | 9  | Describe any efforts to address potential sources of bias                                                                                                                                                                                                                                                                                                                                                                                                                                                                                                                                                                                                   |  |                                                                                                                                                                                                                                                                                                                                                                                                                                                                                                                                                                                                                              | Not applicable.      |
| Study size                   | 10 | Explain how the study size was                                                                                                                                                                                                                                                                                                                                                                                                                                                                                                                                                                                                                              |  |                                                                                                                                                                                                                                                                                                                                                                                                                                                                                                                                                                                                                              | Not applicable.      |

1  
2  
3  
4  
5  
6  
7  
8  
9  
10  
11  
12  
13  
14  
15  
16  
17  
18  
19  
20  
21  
22  
23  
24  
25  
26  
27  
28  
29  
30  
31  
32  
33  
34  
35  
36  
37  
38  
39  
40  
41  
42  
43  
44  
45  
46  
47



|                                                                                                                                           |                                  |            |                                                                                                                                                                                                                                                                                                                                                                                                                                                                                                                                                                      |                                                                                                                                                                                                                                                              |
|-------------------------------------------------------------------------------------------------------------------------------------------|----------------------------------|------------|----------------------------------------------------------------------------------------------------------------------------------------------------------------------------------------------------------------------------------------------------------------------------------------------------------------------------------------------------------------------------------------------------------------------------------------------------------------------------------------------------------------------------------------------------------------------|--------------------------------------------------------------------------------------------------------------------------------------------------------------------------------------------------------------------------------------------------------------|
|                                                                                                                                           |                                  | arrived at |                                                                                                                                                                                                                                                                                                                                                                                                                                                                                                                                                                      |                                                                                                                                                                                                                                                              |
| 1<br>2<br>3<br>4<br>5<br>6                                                                                                                | Quantitative variables           | 11         | Explain how quantitative variables were handled in the analyses. If applicable, describe which groupings were chosen, and why                                                                                                                                                                                                                                                                                                                                                                                                                                        | Page 8, 9 and 10.                                                                                                                                                                                                                                            |
| 7<br>8<br>9<br>10<br>11<br>12<br>13<br>14<br>15<br>16<br>17<br>18<br>19<br>20<br>21<br>22<br>23<br>24<br>25<br>26<br>27<br>28<br>29<br>30 | Statistical methods              | 12         | (a) Describe all statistical methods, including those used to control for confounding<br>(b) Describe any methods used to examine subgroups and interactions<br>(c) Explain how missing data were addressed<br>(d) <i>Cohort study</i> - If applicable, explain how loss to follow-up was addressed<br><i>Case-control study</i> - If applicable, explain how matching of cases and controls was addressed<br><i>Cross-sectional study</i> - If applicable, describe analytical methods taking account of sampling strategy<br>(e) Describe any sensitivity analyses | Page 10, 11 and 12.                                                                                                                                                                                                                                          |
| 31<br>32<br>33<br>34<br>35<br>36<br>37<br>38<br>39<br>40<br>41                                                                            | Data access and cleaning methods |            | ..                                                                                                                                                                                                                                                                                                                                                                                                                                                                                                                                                                   | RECORD 12.1: Authors should describe the extent to which the investigators had access to the database population used to create the study population.<br><br>RECORD 12.2: Authors should provide information on the data cleaning methods used in the study. |
| 42<br>43<br>44                                                                                                                            | Linkage                          |            | ..                                                                                                                                                                                                                                                                                                                                                                                                                                                                                                                                                                   | RECORD 12.3: State whether the study included person-level, institutional-                                                                                                                                                                                   |

|                  |    |                                                                                                                                                                                                                                                                                                                                                 |  |                                                                                                                                                                                                                                                                                                                    |                 |
|------------------|----|-------------------------------------------------------------------------------------------------------------------------------------------------------------------------------------------------------------------------------------------------------------------------------------------------------------------------------------------------|--|--------------------------------------------------------------------------------------------------------------------------------------------------------------------------------------------------------------------------------------------------------------------------------------------------------------------|-----------------|
|                  |    |                                                                                                                                                                                                                                                                                                                                                 |  | level, or other data linkage across two or more databases. The methods of linkage and methods of linkage quality evaluation should be provided.                                                                                                                                                                    |                 |
| <b>Results</b>   |    |                                                                                                                                                                                                                                                                                                                                                 |  |                                                                                                                                                                                                                                                                                                                    |                 |
| Participants     | 13 | (a) Report the numbers of individuals at each stage of the study ( <i>e.g.</i> , numbers potentially eligible, examined for eligibility, confirmed eligible, included in the study, completing follow-up, and analysed)<br>(b) Give reasons for non-participation at each stage.<br>(c) Consider use of a flow diagram                          |  | RECORD 13.1: Describe in detail the selection of the persons included in the study ( <i>i.e.</i> , study population selection) including filtering based on data quality, data availability and linkage. The selection of included persons can be described in the text and/or by means of the study flow diagram. | Not applicable. |
| Descriptive data | 14 | (a) Give characteristics of study participants ( <i>e.g.</i> , demographic, clinical, social) and information on exposures and potential confounders<br>(b) Indicate the number of participants with missing data for each variable of interest<br>(c) <i>Cohort study</i> - summarise follow-up time ( <i>e.g.</i> , average and total amount) |  |                                                                                                                                                                                                                                                                                                                    | Not applicable. |
| Outcome data     | 15 | <i>Cohort study</i> - Report numbers of outcome events or summary measures over time<br><i>Case-control study</i> - Report numbers in each exposure category, or summary measures of exposure<br><i>Cross-sectional study</i> - Report numbers of outcome events or summary measures                                                            |  |                                                                                                                                                                                                                                                                                                                    | Not applicable. |
| Main results     | 16 | (a) Give unadjusted estimates                                                                                                                                                                                                                                                                                                                   |  |                                                                                                                                                                                                                                                                                                                    | Page 13 and 14  |

|                                                                         |                  |                                                                                                                                                                                                                                                                                                                                                                                   |                                                                                                                                                                            |                                                                                                                                                                                                                                                                                                          |                     |
|-------------------------------------------------------------------------|------------------|-----------------------------------------------------------------------------------------------------------------------------------------------------------------------------------------------------------------------------------------------------------------------------------------------------------------------------------------------------------------------------------|----------------------------------------------------------------------------------------------------------------------------------------------------------------------------|----------------------------------------------------------------------------------------------------------------------------------------------------------------------------------------------------------------------------------------------------------------------------------------------------------|---------------------|
| 1<br>2<br>3<br>4<br>5<br>6<br>7<br>8<br>9<br>10<br>11<br>12<br>13<br>14 |                  | and, if applicable, confounder-adjusted estimates and their precision (e.g., 95% confidence interval). Make clear which confounders were adjusted for and why they were included<br>(b) Report category boundaries when continuous variables were categorized<br>(c) If relevant, consider translating estimates of relative risk into absolute risk for a meaningful time period |                                                                                                                                                                            |                                                                                                                                                                                                                                                                                                          |                     |
| 15<br>16<br>17<br>18<br>19                                              | Other analyses   | 17                                                                                                                                                                                                                                                                                                                                                                                | Report other analyses done—e.g., analyses of subgroups and interactions, and sensitivity analyses                                                                          |                                                                                                                                                                                                                                                                                                          | Page 14-19.         |
| <b>Discussion</b>                                                       |                  |                                                                                                                                                                                                                                                                                                                                                                                   |                                                                                                                                                                            |                                                                                                                                                                                                                                                                                                          |                     |
| 21<br>22                                                                | Key results      | 18                                                                                                                                                                                                                                                                                                                                                                                | Summarise key results with reference to study objectives                                                                                                                   |                                                                                                                                                                                                                                                                                                          | Page 19             |
| 23<br>24<br>25<br>26<br>27<br>28<br>29<br>30<br>31<br>32                | Limitations      | 19                                                                                                                                                                                                                                                                                                                                                                                | Discuss limitations of the study, taking into account sources of potential bias or imprecision. Discuss both direction and magnitude of any potential bias                 | RECORD 19.1: Discuss the implications of using data that were not created or collected to answer the specific research question(s). Include discussion of misclassification bias, unmeasured confounding, missing data, and changing eligibility over time, as they pertain to the study being reported. | Page 22             |
| 33<br>34<br>35<br>36<br>37<br>38<br>39<br>40                            | Interpretation   | 20                                                                                                                                                                                                                                                                                                                                                                                | Give a cautious overall interpretation of results considering objectives, limitations, multiplicity of analyses, results from similar studies, and other relevant evidence |                                                                                                                                                                                                                                                                                                          | Page 19, 20 and 21. |
| 41<br>42<br>43<br>44                                                    | Generalisability | 21                                                                                                                                                                                                                                                                                                                                                                                | Discuss the generalisability (external validity) of the study results                                                                                                      |                                                                                                                                                                                                                                                                                                          | Page 21 and 22.     |

| Other Information                                         |    |                                                                                                                                                               |  |                                                                                                                                                          |         |
|-----------------------------------------------------------|----|---------------------------------------------------------------------------------------------------------------------------------------------------------------|--|----------------------------------------------------------------------------------------------------------------------------------------------------------|---------|
| Funding                                                   | 22 | Give the source of funding and the role of the funders for the present study and, if applicable, for the original study on which the present article is based |  |                                                                                                                                                          | Page 23 |
| Accessibility of protocol, raw data, and programming code |    | ..                                                                                                                                                            |  | RECORD 22.1: Authors should provide information on how to access any supplemental information such as the study protocol, raw data, or programming code. | Page 24 |

\*Reference: Benchimol EI, Smeeth L, Guttman A, Harron K, Moher D, Petersen I, Sørensen HT, von Elm E, Langan SM, the RECORD Working Committee. The REporting of studies Conducted using Observational Routinely-collected health Data (RECORD) Statement. *PLoS Medicine* 2015; in press.

\*Checklist is protected under Creative Commons Attribution ([CC BY](https://creativecommons.org/licenses/by/4.0/)) license.
