# Supplementary material for: What is the major driver of China’s hospital medical expenditure growth? A decomposing analysis
Source: PubMed Central journal article supplement — BMJ Open. 2022 Feb 8;12(2):e048308. doi: 10.1136/bmjopen-2020-048308 (PMC8830235; doi:10.1136/bmjopen-2020-048308), 2022-02-08
Supplement: bmjopen-2020-048308supp001.pdf [file bmjopen-2020-048308supp001.pdf]

**Appendix exhibit 1.****Decomposition-standardization methods**

## 1.1 The case of two factors

To measure the relative effect of each of the two factors, we used the decomposition method described by Das Gupta<sup>1,2</sup>. This decomposition was based on the calculation of the standardized rates of each factor, and then, we calculated the additive contributions of each factor to the changes in hospital outpatient or inpatient total expenditure in different years from 2008 to 2018 using the following equations:

Price and intensity standardized medical expenditure:  $y_0: \frac{P_{y1}+P_{y0}}{2} V_{y0}$

Price and intensity standardized medical expenditure:  $y_1: \frac{P_{y1}+P_{y0}}{2} V_{y1}$ .

The difference between the  $y_0$  price and intensity standardized medical expenditure and the  $y_1$  price and intensity standardized medical expenditure is the effect of the difference in the service volume, or the contribution of the difference in the service volume to the difference in the medical expenditure between  $y_0$  and  $y_1$  based on the following equation:

$$V_a = \frac{P_{y1}+P_{y0}}{2} (V_{y1} - V_{y0}).$$

Similarly, the difference between the  $y_0$  service volume standardized medical expenditure and the  $y_1$  service volume standardized medical expenditure is the effect of the difference in the price and intensity, or the contribution of the difference in the price and intensity to the difference in the medical expenditure between  $y_0$  and  $y_1$  based on the following equation:

$$P_a = \frac{V_{y1}+V_{y0}}{2} (P_{y1} - P_{y0}).$$

Then, we obtain the following identity:

$$\Delta TME = TME_{y_1} - TME_{y_0} = V_a + P_a.$$

The relative contributions of the two factors can be expressed as follows:

$$V_r = V_a / \Delta TME * 100\%,$$

$$P_r = P_a / \Delta TME * 100\%,$$

where  $\Delta TME$  is the change in the total medical expenditures between  $y_1$  and  $y_0$  (e.g., 2008 and 2018).  $V_a$  is the difference in the total medical expenditures associated with the difference in the service volume in counterfactual scenarios if the price and intensities were identical in the two years;  $P_a$  is the difference in the total medical expenditures associated with the difference in the service price and intensity in counterfactual scenarios if the service volumes were identical in the two years;  $V_r$  is the relative contribution rate of the difference in the total medical expenditure attributed to the in the service volume by expressed as a percentage; and  $P_r$  is the relative contribution rate of the difference in the total medical expenditure attributed to the difference in the service price and intensity by expressed as a percentage.

## 1.2 The case of four factors

The following four factors were constructed: (1) the total Chinese population, (2) the utilization rate (hospital visits per capita), (3) the share of public hospital service utilization, (4) the service price and intensity; then, the total medical expenditure of public hospitals can be written as follows:

$$TME_y = Pop_y \times \frac{V_{th,y}}{Pop_y} \times \frac{V_{ph,y}}{V_{th,y}} \times P_y,$$

where  $y$  indicates the year;  $TME_y$  is the total medical expenditure of public hospitals;  $Pop_y$  is the population size;  $V_{th,y}$  is the service volume of all hospitals (including public and private hospitals);  $V_{ph,y}$  is the service volume of public hospitals; and  $P_y$  is the service price and intensity of public hospital care.

To make it easier to write the above equation, the total medical expenditure can be written as follows:

$$TME_y = \alpha \beta \gamma \delta.$$

Then, we can express the total medical expenditure in  $y_0$  and  $y_1$  as follows:

$$TME_{y_0} = ABCD, \quad TME_{y_1} = abcd$$

From the decomposition method described by Das Gupta<sup>1,2</sup>, we obtain  $\beta \gamma \delta$ -standardized expenditure as follows:

$$\text{in } y_0 = Q(A),$$

$$\text{in } y_1 = Q(a),$$

such that

$$\alpha\_effect = Q(a-A),$$

where  $Q$  is a function of  $b, c, d, B, C, D$  given by the following:

$$Q = Q(b, c, d, B, C, D) = \frac{bcd + BCD}{4} + \frac{bcD + bCd + Bcd + BCD + BcD + bCD}{12}.$$

Other standardized total medical expenditure and factor effects can be easily derived by interchanging the letters in the above equations. For example, the  $\alpha \gamma \delta$  standardized total medical expenditure and effect are obtained by substituting  $b, a, B, A$  for  $a, b, A, B$ , respectively.

Then, we obtain the following identity:

$$\Delta TME = TME_{y_1} - TME_{y_0} = \alpha\_effect + \beta\_effect + \gamma\_effect + \delta\_effect$$

**Note**

1. Das Gupta P. Decomposition of the difference between two rates and its consistency when more than two populations are involved. *Mathematical Population Studies:: An International Journal of Mathematical Demography* 1991;3(2):105-25.
2. Das Gupta P. Standardization and decomposition of rates: a users's manual: US Department of Commerce, Economics and Statistics Administration, Bureau of the Census 1993.
